# Supplementary material for: Increased DNA methylation, cellular senescence and premature epigenetic aging in guinea pigs and humans with tuberculosis
Source: Aging (Albany NY). 2022 Mar 7;14(5):2174–93. doi: 10.18632/aging.203936 (PMC8954968; doi:10.18632/aging.203936)
Supplement: Supplementary Tables 1-3 [file aging-14-203936-s002.xlsx]

## Sheet: Supplementary Table 1
Supplementary Table 1. DNA Methylation results in the guinea pig (Cavia Porcellus) model of TB infection.
Cavia_hypermethylated _Lung	Cavia_hypomethylated _Lung	Cavia_hypermethylated _Spleen	Cavia_hypomethylated _Spleen
GRM4	BTBD11	SYN3	BLCAP
NKAIN2	TSHZ2	BTBD11	ENSCPOG00000000165
RIN2	BCAS1	WDFY4	BRD1
SORCS2	RPL34	CAMTA1	CANT1
MINK1	ENSCPOG00000021466	HOXA3	CASZ1
TSHZ2	GRM4	STAB2	CCND3
TMEM132C	CDH4	ZFPM1	CCNK
JPH2	ENSCPOG00000031832	GRM4	CD5
CAPZB	ENSCPOG00000036145	RFX4	CNKSR1
IL1R2	GRHL2	LARGE1	ENPEP
PARD3	SEPTIN9	MKNK2	ENSCPOG00000005740
PAX7	MVB12B	RXRA	ENSCPOG00000021409
SYN3	OSBPL2	TNS3	ENSCPOG00000023079
CAMTA1	RREB1	ENSCPOG00000006951	ENSCPOG00000026684
ERG	MYH9	ENSCPOG00000007591	ENSCPOG00000031348
PTPRM	ECE1	FHAD1	ENSCPOG00000031832
CACHD1	GGACT	PRDM16	ENSCPOG00000034105
CDH4	ITPK1	SEPTIN9	ENSCPOG00000034414
ENSCPOG00000006777	PTPN14	TNKS1BP1	ENSCPOG00000035742
SEMA3E	ENSCPOG00000026214	SORCS2	ENSCPOG00000036145
VAC14	ENSCPOG00000034414	ERG	ENSCPOG00000037249
APC2	ENSCPOG00000035742	PTPRM	ENSCPOG00000037311
DAAM2	ENSCPOG00000037311	FSTL4	ENSCPOG00000039513
KSR2	ENSCPOG00000039513	GRHL2	ERGIC1
MVB12B	ESRRG	NTSR1	GABBR2
RBBP8NL	TIAM1	PDE4B	GRIK1
STK10	AGAP1	ZMYND8	HTR3B
TBC1D22A	NTM	ALS2CL	KIF6
BTBD9	TM4SF5	ANKS1A	LRRK2
EFCAB6	DENND1A	ARHGAP28	MAPK8IP3
ENSCPOG00000003726	EDN1	ATP8B4	OSBPL2
ENSCPOG00000031832	ENSCPOG00000038409	CD82	PDE9A
ENSCPOG00000036145	FBN1	CDH13	PGM1
GPRASP2	SORCS3	CHST11	POC1B
HDAC2	TNFRSF19	FRMD4A	PPP1R37
LCA5L	UNC13C	PITPNC1	REM1
LIPC	WLS	RERE	RREB1
MATN2	CFAP54	SCARB1	SAAL1
PARD3B	ENSCPOG00000035752	SKAP1	SH3TC1
RUFY3	ARAP3	SRCIN1	STAB2
SELE	DCP2	ZMAT4	TIAM1
ACRBP	DNAJB12	MINK1	TMEM95
ARMC2	ENSCPOG00000008684		TNK1
C19ORF25	ENSCPOG00000032558	CACHD1	TTC7A
CAD	ENSCPOG00000037854	CDH4	VPS13C
CAMK2G	ENSCPOG00000038107	ENSCPOG00000006777	VPS53
CDH1	EPAS1	SEMA3E	VSTM2L
CLCN2	FCHSD1	VAC14	ZNF217
EIF4G1	GABRP	ADAMTSL2	ZNF593
ENSCPOG00000004930	GAS6	ANKRD39	AGO2
ENSCPOG00000015087	KRT23	CAMKK2	AKAP1
ENSCPOG00000022638	LAX1	COL14A1	ALG12
ENSCPOG00000023598	MICU1	CSMD1	ALG6
ENSCPOG00000038430	RELL2	DAB2IP	ALPK2
ERFE	SYK	MYO10	ANKH
FAM131A	XKRX	PWWP3A	ARHGAP22
FNIP2	ZFHX3	WWOX	ARHGAP27
GADD45B	AGPS	ADARB1	ARHGAP35
GALNT10	CPNE2	ATOH8	ASCL1
GRID1	INHA	BAHCC1	ATP6V1C1
ILKAP	MANBA	BAIAP2	B3GALNT1
KLHL30	OBSL1	CBX6	BANF2
MYH14	PROP1	COL26A1	BICDL1
MYOF	CAMTA1	COL4A2	BOP1
PAX2	RFX4	CPNE5	BTBD9
PERP	PRDM16	CYTH2	C12ORF73
PIP5K1C	TNS3	DNM2	C1QL2
PREX1	CDH13	DSCAM	CA10
SLC30A3	FHAD1	ENSCPOG00000000165	CACNA1I
SPON2	FSTL4	ENSCPOG00000006637	CADM1
TOX	KIF6	ENSCPOG00000026334	CAMK2A
VIPR2	EFCAB6	FAM83E	CDH13
ADAMTS16	KSR2	FECH	CDH4
ANO3	COL26A1	FLI1	CEP83
B3GALT4	ENSCPOG00000003726	GADD45A	CHAF1A
BCAS3	KLHL29	GASK1A	CIITA
CA4	MACROD1	GNG12	CLCN5
CCER1	REM1	HSPG2	COL6A2
CD8A	SEMA3A	IGFBP7	CREG2
CDC42EP4	SNTB1	KCNJ14	CSAD
CMC2	SYT3	KIF6	DDX6
COLGALT2	ABLIM2	KLHL29	DEXI
CPM	ADAMTS2	LEMD2	DIXDC1
CRYBG2	BANP	LIMD1	DNAH2
CTSW	BLCAP	LRMDA	DOCK4
CUL2	CAPZB	MACROD1	DOCK5
CYP4V2	CDC42BPB	MCPH1	DRC1
DCC	CDH23	MOB3A	DSCAML1
DNAAF1	CORO2B	MYH9	DYNLRB2
ELOA	EFCC1	NAV1	EFCAB6
ENSCPOG00000003403	ENSCPOG00000025309	NFATC2	EHD4
ENSCPOG00000007158	KSR1	NFIA	ENSCPOG00000001181
ENSCPOG00000013370	NCOR2	NGFR	ENSCPOG00000002549
ENSCPOG00000015175	NHLRC4	NOL4L	ENSCPOG00000002594
ENSCPOG00000025128	PARD3	NR5A1	ENSCPOG00000002804
ENSCPOG00000034758	PRSS56	PLCG2	ENSCPOG00000003851
EOGT	RASGRF2	PLEKHM1	ENSCPOG00000006779
EPYC	TRAF3IP1	PMEPA1	ENSCPOG00000007052
FGD2	ACVRL1	POMGNT2	ENSCPOG00000009459
FIBP	ADGRD1	RNF220	ENSCPOG00000015087
FN1	BCAS3	SCUBE1	ENSCPOG00000021466
GAL3ST3	CAPN15	SDK2	ENSCPOG00000021540
GNG7	CHMP6	SMAD6	ENSCPOG00000022803
HEG1	CNKSR1	SPHK2	ENSCPOG00000024067
INPP5K	CTIF	SPOP	ENSCPOG00000024747
KIF13B	DOCK5	SYT3	ENSCPOG00000026008
LDB2	ENSCPOG00000008089	TCF4	ENSCPOG00000026037
LDB3	ENSCPOG00000015684	WFDC1	ENSCPOG00000031478
MAP11	ENSCPOG00000031348	ZMIZ1	ENSCPOG00000033032
MED27	EOGT	NKAIN2	ENSCPOG00000033145
NDUFAF6	EXT1	APC2	ENSCPOG00000034863
PFDN6	FRYL	DAAM2	ENSCPOG00000035752
PITPNA	LRRC1	KSR2	ENSCPOG00000038409
PLEKHH1	MLN	MVB12B	ENSCPOG00000038951
PLXNC1	NXN	RBBP8NL	ENSCPOG00000039540
PPP1R21	PPP1R9B	STK10	ETV5
PRKAR2B	PRKAR2B	TBC1D22A	EVI5L
RGL2	SHE	AK8	FAM83A
RMND5A	SMOC1	ANKRD23	FBP2
RPL34	ZNF593	ANKRD44	FCN1
RPS18	AFF3	CABLES1	GCM1
SCARB2	AGFG1	CHST3	GMDS
SCYL2	ALPK2	CMIP	GPD2
SF3B2	AOPEP	DNAH10	GRM4
SGCB	BCAN	DSCAML1	GRPEL1
SLC44A5	CACNA2D4	ENSCPOG00000002778	HOXD3
SMOC1	CARMIL1	ENSCPOG00000003488	HSP90B1
SMTN	CGNL1	GSG1L	ICOS
TRIO	CHKA	HPCAL1	IFNGR2
TRPS1	CHST9	MAP4K4	IRX1
TSHZ1	CRB3	MICALL1	ITGB2
TTC13	CRMP1	MYLK	ITGB3BP
VPS52	DENND1C	MYO5A	JARID2
WDR46	DLGAP2	NCALD	KATNAL2
ZNF217	DNAJB1	NRP2	KCNAB1
ZNF683	ECE2	PARVB	KCNAB2
ZNF862	ENSCPOG00000004733	PPP2R2C	KCNJ15
HOXA3	ENSCPOG00000009257	PRKCZ	KIF1C
STAB2	ENSCPOG00000011101	SAMD4A	LIN7B
RFX4	ENSCPOG00000021540	SEMA3A	MAN1A1
FSTL4	ENSCPOG00000037382	SEMA4C	MCCC1
GRHL2	EYA2	SGMS2	MED30
NTSR1	FAM155A	SNTB1	METAP2
PDE4B	FAM180A	TBC1D31	MYO10
ZMYND8	FBLN1	UGDH	NKX3-2
ADAMTSL2	FBXL7	ABLIM2	NPTX2
ANKRD39	FNBP1	ADAMTS10	PARD3B
CAMKK2	GATA2	ADAMTS2	PCNX2
COL14A1	GPD2	ADAMTS8	PDK2
CSMD1	IFIT3	ADGRD2	PIK3R6
DAB2IP	IL10RA	AEN	PIP4K2B
MYO10	KCNJ4	AGAP2	PLEKHM1
PWWP3A	MAN1C1	AIFM1	POU2F2
WWOX	MEIS1	AOC3	PPARD
AK8	NEO1	APBB1IP	PPFIA3
ANKRD23	NEURL1B	ATP2C2	PPP1R9A
ANKRD44	NFKB1	AURKC	PRDM16
CABLES1	NHS	BANP	PSMB3
CHST3	NPR2	BMP7	PSMF1
CMIP	OAS2	BRD1	RAB35
DNAH10	PCDHGA6	C20ORF27	RAB3GAP2
DSCAML1	PCLO	CACNA1G	RAB7A
ENSCPOG00000002778	PCP4	CACNA2D1	RASAL1
ENSCPOG00000003488	PDSS2	CASZ1	RASGRF2
GSG1L	PTPRG	CDC42BPB	RFTN1
HPCAL1	RHEB	CDH23	ROR1
MAP4K4	RYR3	CDK5RAP3	RPA2
MICALL1	SASH1	CLDN14	SAMD14
MYLK	SCARA5	CLYBL	SCX
MYO5A	SEL1L	DGKD	SEC24D
NCALD	SLC27A1	ECE1	SH3GL1
NRP2	SNX6	EFCC1	SHROOM4
PARVB	SSBP2	EFHD2	SIK3
PPP2R2C	TECR	ENG	SINHCAF
PRKCZ	TUBB4A	ENSCPOG00000000591	SLA
SAMD4A	VIT	ENSCPOG00000005099	SLC12A7
SEMA3A	ZBTB40	ENSCPOG00000008956	SLC15A3
SEMA4C	ZNF423	ENSCPOG00000019962	SLC16A14
SGMS2	ZNF609	ENSCPOG00000031491	SLC22A5
SNTB1	ABCA1	ENSCPOG00000032985	SLC35F1
TBC1D31	ALKBH4	ENSCPOG00000038397	SLC4A3
UGDH	AR	ENSCPOG00000040408	SLCO5A1
ACSF3	ASAP2	EPHB2	SNRNP70
ANO4	ATP6V0A1	FAM222B	SPRTN
ARID3A	BASP1	FAM43A	SULF2
CACNA1A	BRAP	FMNL1	SYNRG
CELSR1	CA5A	FSD1	TADA2B
COL4A1	CALM1	GALK2	TBC1D22A
CORO2B	CALR	GGACT	TBX3
CRX	CCDC91	GGT5	TG
CYFIP1	CCKAR	GLIS1	THSD7B
CYTH1	CCR3	GRIK4	TLR8
DLGAP1	CD276	GRK5	TM4SF5
DPYSL2	CDC23	GTPBP3	TMEM132A
ENOX1	CDKN3	HECW2	TMEM9
ENSCPOG00000005190	CENPP	HOXA5	TMIGD1
ENSCPOG00000009133	CHRNA9	HSPA12B	TNRC6B
ENSCPOG00000030916	CLK1	IGFBP4	TTBK1
FYN	CNKSR3	IL17RC	USP3
GTF2IRD1	COMMD3	IL4R	WASHC4
HOXA2	COX10	IQGAP2	WDR20
IDUA	CPNE4	IRF2BPL	WWOX
IKZF1	CTNND2	ITPR3	WWP1
ITPK1	DAB1	JUP	ZBED4
LAMA1	DCPS	KCNIP4	ZCCHC14
LTBP2	DIP2B	KCNN4	ZDHHC15
MAGI2	DOHH	KIF26A	ZFAND3
MAST3	DUOX1	KSR1	ZMIZ1
MYO1E	ELMO1	LEF1	ZNF182
NBEAL2	EMC10	LEPR	ZNF205
NCAPH	EML5	LMNA	ZNF367
NDUFS7	ENSCPOG00000002226	LRRC18	ZNF395
NELFB	ENSCPOG00000002586	LRRK1	ZNF574
NRTN	ENSCPOG00000003855	MAPK14	ZNF667
OSBPL2	ENSCPOG00000005481	MEAK7	ENSCPOG00000025309
PARVG	ENSCPOG00000008471	MYO16
PKN1	ENSCPOG00000011024	MYOC
POC1B	ENSCPOG00000021011	NCOR2
PTGER1	ENSCPOG00000021491	NEURL3
RORA	ENSCPOG00000023341	NFIB
SH2D4A	ENSCPOG00000023409	NHLRC4
SLC26A1	ENSCPOG00000025122	NMRK1
TBC1D16	ENSCPOG00000025306	NOTCH1
TTC7B	ENSCPOG00000025434	NRG3
WFS1	ENSCPOG00000026280	OPA1
ADAMTS13	ENSCPOG00000030030	OSBPL11
AGAP1	ENSCPOG00000030135	OTOG
ARHGEF15	ENSCPOG00000031995	OXR1
ARHGEF16	ENSCPOG00000033745	P2RX4
ATG7	ENSCPOG00000033869	PALD1
ATP8B1	ENSCPOG00000035778	PATJ
ATXN10	ENSCPOG00000036704	PIEZO2
BCAS1	ENSCPOG00000036731	PLBD2
BCL11B	ENSCPOG00000037775	PPP2R2A
BCL9L	ENSCPOG00000037915	PRSS56
C12ORF50	ENSCPOG00000038786	PTPN14
CACNG2	ENSCPOG00000040438	RAB33A
CADM1	ENSCPOG00000040651	RBFOX1
CRADD	ETNPPL	RCAN2
EBF2	FAM155B	RELB
ELK3	FBXO17	SCARA3
ENSCPOG00000008967	FURIN	SDC3
ENSCPOG00000015684	FZD10	SEMA6C
ENSCPOG00000024067	GAB1	SH2D3C
ENSCPOG00000025639	GADD45GIP1	SLC12A7
ENSCPOG00000025754	GAR1	SLC15A1
ENSCPOG00000037083	GLTPD2	SLC24A4
ESRRG	GNAI2	SLCO4A1
EXT1	GPATCH2	SMYD2
FADS2	H2BC1	SPARC
FRY	HSF2BP	SPSB1
FZD6	IFT74	SSRP1
GAMT	IGSF8	SYNPO
GBGT1	IL16	TCF7L1
GNL1	IL6R	TIMP3
GOLT1A	INF2	TLE2
GRIN3B	KCNJ1	TMIE
GSTM1	KCNJ9	TOR2A
HLCS	KCTD20	TRAF3IP1
HTR6	KIF5B	TRPM3
KCNJ6	KLF7	TTC16
KIF1B	LAMA3	UBASH3A
KIF3C	LINGO1	ULK1
KLC1	LRTM2	UQCC2
LMX1B	MACF1	USP2
LRRC47	MAMLD1	USP40
MAD1L1	MAPK7	VGLL4
MLLT1	MFAP4	VWA8
MRPL58	MMP19	ZC2HC1B
MTSS2	MORC3	ZDHHC7
MYO5C	MRPS12	RIN2
NOS3	MYBPC2	TMEM132C
NOSIP	MYOZ2	BTBD9
NPNT	MYRFL	EFCAB6
OLFML2A	NEUROD2	ENSCPOG00000003726
OSTF1	NOTCH2	ENSCPOG00000031832
PLEKHA6	NR1I2	ENSCPOG00000036145
PRR3	NSL1	GPRASP2
PTGES	NSUN4	HDAC2
PTPA	OGN	LCA5L
PTPRS	OMD	LIPC
RAB3IL1	ORAI2	MATN2
RAPGEF1	PCDH19	PARD3B
REXO4	PCIF1	RUFY3
RFTN2	PCSK7	SELE
RREB1	PCSK9	ACSF3
SCUBE2	PDZD2	ANO4
SEMA3C	PEX14	ARID3A
SH2B2	PLCL1	CACNA1A
SMAD3	PLPP4	CELSR1
SMG6	PRKCE	COL4A1
SMIM1	PRTG	CORO2B
SNRNP200	PXDC1	CRX
SPECC1	RAD23A	CYFIP1
SPNS2	RAI2	CYTH1
SPRTN	RASGRF1	DLGAP1
SYBU	RC3H1	DPYSL2
SYNE3	RNF2	ENOX1
TEX12	RNF214	ENSCPOG00000005190
TLN2	RRH	ENSCPOG00000009133
TMEFF2	S1PR1	ENSCPOG00000030916
TMEM51	SDSL	FYN
TMPRSS11E	SEMA3B	GTF2IRD1
TOR4A	SERPING1	HOXA2
TRIB1	SEZ6	IDUA
TSPAN15	SGTA	IKZF1
TYK2	SHANK2	ITPK1
UTRN	SHF	LAMA1
WDR18	SLC13A4	LTBP2
WWC1	SLC25A23	MAGI2
ZBTB7A	SLC30A10	MAST3
ZFPM2	SLC9A6	MYO1E
ZNF652	SLCO2A1	NBEAL2
AAGAB	SMYD1	NCAPH
ACOT8	SOST	NDUFS7
ACTL7A	SPEN	NELFB
ACTL7B	SPG7	NRTN
ADAP2	SPTA1	OSBPL2
AFAP1L1	SRPK1	PARVG
AFF3	SRRM3	PKN1
AKAP8L	SS18L1	POC1B
AKT1	STK38	PTGER1
AMT	SUPT3H	RORA
ANAPC13	TBC1D2B	SH2D4A
ANKRD54	TBX2	SLC26A1
ANOS1	TBX5	TBC1D16
AP1S2	THBD	TTC7B
ARHGAP1	THOP1	WFS1
ARHGAP10	TMF1	A4GALT
ARHGEF3	TMLHE	ABCC3
ASAP1	TNNI1	ABCD1
ATP13A2	TSHZ3	ABHD14A
ATP6V1E2	TSPAN2	ABHD14B
ATXN7L1	USP24	ABLIM3
AXIN2	VMO1	ACER2
BLK	WBP1L	ACTRT2
BPIFC	WT1	ACVRL1
BPTF	WWTR1	ADAM23
BTBD17	ZBTB17	ADCK2
CANX	ZDHHC3	ADCY10
CCDC12	ZNF335	ADGRD1
CCN2	ZNF827	ADGRL1
CCNT1		ADI1
CCSER1		ADIPOR2
CD6		ADK
CDR2L		AEBP1
CEP131		AKR7L
CEP63		ALDH1A2
CEP76		ANGPTL2
CFAP46		ANKMY1
CFAP58		ANKRD33
CHD7		ANXA4
CHKA		AQP6
CIAO1		ARG1
CIB4		ARHGAP22
CNTF		ARHGAP23
COL4A4		ARHGAP24
COL6A2		ARHGAP27
COLEC12		ARHGEF10L
CREM		ARHGEF40
CROT		ASPA
CSRP1		ASS1
CTRC		ATCAY
DARS1		ATP10A
DCAF1		ATP5F1D
DDX31		BACE1
DEGS1		BANF2
DLGAP4		BATF
DMD		BCAP31
DNAH11		BDH2
DNAH17		BMPR1B
DNAJB1		BMPR2
DNAJC15		BTBD18
DOCK3		C11ORF95
DOK1		C1QTNF1
DTX3L		C6ORF89
DUPD1		CACNG4
DUSP22		CALCOCO2
ECEL1		CALM3
EIF2B2		CAPN15
ELP1		CARD10
ENO3		CARHSP1
ENSCPOG00000001555		CBY1
ENSCPOG00000004718		CCDC150
ENSCPOG00000004813		CCDC194
ENSCPOG00000004827		CCDC63
ENSCPOG00000005670		CCDC92
ENSCPOG00000005881		CD28
ENSCPOG00000005885		CDCP1
ENSCPOG00000006523		CDH22
ENSCPOG00000006835		CDK18
ENSCPOG00000007533		CDS1
ENSCPOG00000007817		CHMP6
ENSCPOG00000009525		CHRND
ENSCPOG00000010359		CHRNG
ENSCPOG00000010453		CINP
ENSCPOG00000010720		CLCN6
ENSCPOG00000011753		CMKLR1
ENSCPOG00000011993		CNGA3
ENSCPOG00000012222		CNKSR2
ENSCPOG00000014222		COL1A1
ENSCPOG00000014317		COL5A1
ENSCPOG00000014865		COLEC10
ENSCPOG00000014970		COTL1
ENSCPOG00000019324		CPT1A
ENSCPOG00000019712		CRLF3
ENSCPOG00000020022		CROCC2
ENSCPOG00000020782		CRY2
ENSCPOG00000021122		CRYBA4
ENSCPOG00000022546		CST3
ENSCPOG00000024452		CTBP1
ENSCPOG00000026958		CTIF
ENSCPOG00000031431		CUX1
ENSCPOG00000031535		CXXC5
ENSCPOG00000035105		CYTH4
ENSCPOG00000037160		DAZAP1
ENSCPOG00000037287		DBP
ENSCPOG00000038873		DCAF15
ENSCPOG00000039734		DCLK2
ENSCPOG00000040138		DFFA
ERBB3		DGKH
ERRFI1		DHRS7B
EXOC2		DIS3L2
EYA2		DLG5
FADS3		DNAI1
FAM117A		DND1
FAM124B		DPP7
FAM155A		DPYSL3
FAM78A		DRC7
FAN1		DRD2
FCGRT		DRGX
FDX1		EGR1
FOXN3		EHD3
FOXO6		EIF3I
FPGS		EIF4E2
FTCD		ENO2
GATA2		ENSCPOG00000001594
GDF5		ENSCPOG00000002810
GDF5OS		ENSCPOG00000002924
GLIS3		ENSCPOG00000003842
GLYR1		ENSCPOG00000003968
GNAO1		ENSCPOG00000004094
GOLIM4		ENSCPOG00000004811
GPR142		ENSCPOG00000004994
GRPEL2		ENSCPOG00000007962
GTF2I		ENSCPOG00000008089
HCN4		ENSCPOG00000009159
HPD		ENSCPOG00000009706
HSPA1L		ENSCPOG00000010848
IFI30		ENSCPOG00000010976
IFNGR1		ENSCPOG00000011117
IGSF9B		ENSCPOG00000011182
IL22RA2		ENSCPOG00000011190
IQCM		ENSCPOG00000011910
IRS4		ENSCPOG00000015285
ITGA3		ENSCPOG00000015307
ITSN2		ENSCPOG00000020108
JMJD6		ENSCPOG00000020238
KANSL2		ENSCPOG00000020809
KCNQ4		ENSCPOG00000022169
KIAA1217		ENSCPOG00000022774
KIRREL1		ENSCPOG00000023082
KLHL42		ENSCPOG00000024371
KLK4		ENSCPOG00000024469
LMCD1		ENSCPOG00000024494
LOXL3		ENSCPOG00000024719
LRCOL1		ENSCPOG00000024892
LRRC74A		ENSCPOG00000025094
LSM2		ENSCPOG00000026214
M1AP		ENSCPOG00000026466
MAST1		ENSCPOG00000026703
MEIS1		ENSCPOG00000026831
MFSD11		ENSCPOG00000030015
MICAL2		ENSCPOG00000030298
MLC1		ENSCPOG00000030460
MLH3		ENSCPOG00000030593
MOV10L1		ENSCPOG00000030932
MPHOSPH10		ENSCPOG00000035156
MPV17L2		ENSCPOG00000035419
MTOR		ENSCPOG00000035729
MTR		ENSCPOG00000035962
MUC15		ENSCPOG00000036087
MYL9		ENSCPOG00000036241
MYO9A		ENSCPOG00000037877
NAV2		ENSCPOG00000038111
NBEAL1		ENSCPOG00000038131
NBL1		ENSCPOG00000038899
NDUFB7		ENSCPOG00000039527
NEO1		ENSCPOG00000039530
NHS		ERCC6
NME6		EVA1B
NOS2		F2R
NOXO1		FAM167B
NQO2		FAM240A
NR6A1		FAM71D
OTUD7A		FAM92B
P2RX2		FBP2
PADI3		FBXL13
PDK2		FGD5
PDLIM3		FRYL
PFN1		FZD5
PGPEP1L		GABBR2
PHEX		GADD45G
PHF5A		GALNTL6
PKNOX1		GAS2
PLCB3		GATA5
PLEKHA2		GFI1
PLOD3		GFI1B
POU2F2		GFOD1
PPP1R11		GINS2
PPP1R12C		GIPC1
PPP1R13B		GIPC3
PRDM11		GJB5
PRDM4		GLP1R
PRICKLE2		GLRA2
PRIMA1		GLT8D2
PROM2		GNAQ
PSMD14		GNPDA1
PTK2B		GOLGA5
PTPN18		GPC1
PTPN3		GPR157
RAB3A		GPRC5C
RAB9A		GRIFIN
RABGAP1L		GSE1
RAC2		HACL1
RADIL		HARS1
RANBP3		HCN2
RBL2		HDAC5
RBP1		HDDC3
RCAN1		HIP1R
RCN3		HLA-DMA
RCSD1		HRH3
RFX2		IGSF21
RHOA		IK
RNF151		IL1R1
RNF167		INO80
ROGDI		IQSEC1
RPL3		ISG20
RPS6KA1		IZUMO4
RPTOR		KCNH2
RUNX1		KCNIP3
SAMD5		KDM2B
SCN5A		KDM4B
SEC14L1		KIAA0930
SEPTIN12		KIDINS220
SH2D3A		KIRREL3
SHANK3		KLHL20
SLC22A23		KLHL34
SLC25A11		KMT2D
SLC27A1		LCK
SLC29A1		LCTL
SLC6A1		LITAFD
SMIM22		LONP1
SNX21		LPIN3
SNX6		LRRC1
SORCS3		LRRC23
SPATA17		LTBP4
SSBP2		MAMSTR
TAF1C		MAN1A1
TBC1D1		MAN1B1
TBC1D22B		MAP7D1
TBL3		MARK1
TCTA		MAST4
TECR		MCCC1
TEKT5		MGRN1
TENM2		MIDN
TENM4		MIER1
TFCP2		MLN
TM4SF5		MLPH
TMEM127		MMP17
TMEM17		MOCS1
TNFRSF19		MRPS18A
TNRC18		MYMK
TOB2		MYO18B
TOLLIP		MYO1F
TRANK1		MYPN
TRIM47		MYT1
TRIM7		NACC2
TRIP10		NAGS
TSPEAR		NCAM1
TTC17		NDUFB2
TTC37		NFAM1
TUBB2B		NFIX
TXNDC16		NKD2
UBR5		NKX2-3
UPB1		NPEPL1
URB1		NT5DC3
VARS1		NTM
VMA21		NTN4
VPS13D		NUP160
VWA7		NXN
WDFY2		OAS3
WLS		OLR1
YIPF1		OPCML
YTHDF2		OS9
ZADH2		OSGIN1
ZHX2		PABPC4L
ZNF185		PAPLN
ZNF574		PCCA
ZNHIT1		PDE1A

## Sheet: Supplementary Table 2
Supplementary Table 2. Pathway analysis of hypermethylated genes in humans and guinea pig (Cavia Porcellus) with TB.
KEGG								REACTOME								WIKIPATHWAYS
GeneSet	-log10(pValue) Cavia_lung.ALL_genes	-log10(pValue) Cavia_Spleen.ALL_genes	-log10(pValue) CD14_TB.ALL_genes	-log10(pValue) CD4_TB.ALL_genes	-log10(pValue) CD8_TB.ALL_genes			GeneSet	-log10(pValue) Cavia_lung.ALL_genes	-log10(pValue) Cavia_Spleen.ALL_genes	-log10(pValue) CD14_TB.ALL_genes	-log10(pValue) CD4_TB.ALL_genes	-log10(pValue) CD8_TB.ALL_genes			GeneSet	-log10(pValue) Cavia_lung.ALL_genes	-log10(pValue) Cavia_Spleen.ALL_genes	-log10(pValue) CD14_TB.ALL_genes	-log10(pValue) CD4_TB.ALL_genes	-log10(pValue) CD8_TB.ALL_genes
KEGG_FOCAL_ADHESION	6.833	13.781	7.95	4.249	31.204			REACTOME_HEMOSTASIS	5.379	20.624	8.143	2.584	23.256			WP_VEGFAVEGFR2_SIGNALING_PATHWAY	10.877	13.462	9.886	1.351	33.262
KEGG_PATHWAYS_IN_CANCER	5.394	13.67	7.95	8.802	46.702			REACTOME_DEVELOPMENTAL_BIOLOGY	9.166	20.291	18.991	6.815	77.556			WP_FOCAL_ADHESION	8.38	13.334	7.726	3.874	30.2
KEGG_MAPK_SIGNALING_PATHWAY	1.506	12.557	6.873	4.034	25.833			REACTOME_NERVOUS_SYSTEM_DEVELOPMENT	10.18	20.231	15.762	8.724	58.584			WP_MYOMETRIAL_RELAXATION_AND_CONTRACTION_PATHWAYS	1.71	10.676	7.006	3.802	13.916
KEGG_NEUROACTIVE_LIGAND_RECEPTOR_INTERACTION	1.473	11.174	11.017	9.573	19.44			REACTOME_NEURONAL_SYSTEM	4.41	20.231	21.588	12.308	47.23			WP_MAPK_SIGNALING_PATHWAY		10.213	6.578	3.551	26.446
KEGG_CALCIUM_SIGNALING_PATHWAY	3.831	11.174	12.276	7.338	19.514			REACTOME_SIGNALING_BY_RHO_GTPASES_MIRO_GTPASES_AND_RHOBTB3	6.419	20.008	14.262	1.751	31.841			WP_EPITHELIAL_TO_MESENCHYMAL_TRANSITION_IN_COLORECTAL_CANCER	2.044	9.681	5.7	3.679	15.141
KEGG_ADHERENS_JUNCTION	3.245	9.771	4.574	4.194	14.195			REACTOME_RHO_GTPASE_CYCLE	5.018	20.008	13.635		35.437			WP_INSULIN_SIGNALING	2.949	8.607	8.341	1.532	15.117
KEGG_AXON_GUIDANCE	3.701	8.883	7.227	4.968	25.833			REACTOME_TRANSPORT_OF_SMALL_MOLECULES	1.719	19.036	18.493	3.011	65.265			WP_PHOSPHODIESTERASES_IN_NEURONAL_FUNCTION		8.252	3.789	2.51	9.23
KEGG_ARRHYTHMOGENIC_RIGHT_VENTRICULAR_CARDIOMYOPATHY_ARVC	1.328	8.868	5.129	2.825	17.248			REACTOME_SIGNALING_BY_GPCR	2.259	18.408	19.622	10.116	41.221			WP_ARRHYTHMOGENIC_RIGHT_VENTRICULAR_CARDIOMYOPATHY	1.374	8.135	4.627	2.478	16.153
KEGG_DILATED_CARDIOMYOPATHY		8.8	5.768	2.968	14.17			REACTOME_MEMBRANE_TRAFFICKING	3.812	17.516	5.758	4.731	30.182			WP_ANGIOPOIETIN_LIKE_PROTEIN_8_REGULATORY_PATHWAY	2.928	7.545	7.481		10.592
KEGG_WNT_SIGNALING_PATHWAY	3.349	8.034	5.986	1.368	12.706			REACTOME_VESICLE_MEDIATED_TRANSPORT	4.069	16.841	5.166	4.731	27.404			WP_THERMOGENESIS		7.407	6.689	3.375	7.995
KEGG_REGULATION_OF_ACTIN_CYTOSKELETON	2.909	7.894	7.287	3.08	23.261			REACTOME_EXTRACELLULAR_MATRIX_ORGANIZATION	3.869	16.457	12.676	6.037	46.731			WP_TGFBETA_RECEPTOR_SIGNALLING_IN_SKELETAL_DYSPLASIAS		7.337	2.774		9.369
KEGG_MELANOGENESIS		7.106	6.773	5.823	11.728			REACTOME_SIGNALING_BY_RECEPTOR_TYROSINE_KINASES	8.06	15.74	12.851	7.13	48.819			WP_THYROID_HORMONES_PRODUCTION_AND_THEIR_PERIPHERAL_DOWNSTREAM_SIGNALLING_EFFECTS		7.146	4.081		10.157
KEGG_INSULIN_SIGNALING_PATHWAY	3.586	6.507	5.306		7.734			REACTOME_TRANSMISSION_ACROSS_CHEMICAL_SYNAPSES	3.853	14.826	10.51	7.344	30.22			WP_FOCAL_ADHESIONPI3KAKTMTORSIGNALING_PATHWAY	3.188	7.04	10.164	9.382	35.004
KEGG_SMALL_CELL_LUNG_CANCER	2.909	6.426			12.776			REACTOME_NEUROTRANSMITTER_RECEPTORS_AND_POSTSYNAPTIC_SIGNAL_TRANSMISSION	2.699	14.294	8.667	6.815	20.268			WP_PI3KAKT_SIGNALING_PATHWAY	2.587	7.018	6.392	7.809	31.475
KEGG_TIGHT_JUNCTION	2.591	6.262	5.986	3.084	11.967			REACTOME_CELL_CELL_COMMUNICATION	2.89	12.13	5.785	2.262	14.293			WP_SMALL_CELL_LUNG_CANCER	2.98	6.971			11.366
KEGG_T_CELL_RECEPTOR_SIGNALING_PATHWAY		5.999	3.256		10.998			REACTOME_POST_TRANSLATIONAL_PROTEIN_MODIFICATION		12.046	11.979	3.277	45.086			WP_IL18_SIGNALING_PATHWAY	2.087	6.955	6.689		12.577
KEGG_GAP_JUNCTION		5.999	4.652	4.216	7.855			REACTOME_PLATELET_ACTIVATION_SIGNALING_AND_AGGREGATION	1.844	11.585	5.149		17.121			WP_BRAINDERIVED_NEUROTROPHIC_FACTOR_BDNF_SIGNALING_PATHWAY	3.151	6.948	3.754	2.589	15.837
KEGG_PURINE_METABOLISM		5.922	1.984		6.97			REACTOME_DISEASES_OF_SIGNAL_TRANSDUCTION_BY_GROWTH_FACTOR_RECEPTORS_AND_SECOND_MESSENGERS	2.104	11.131	10.503	2.643	29.18			WP_HYPOTHESIZED_PATHWAYS_IN_PATHOGENESIS_OF_CARDIOVASCULAR_DISEASE	1.758	6.45	1.646		5.781
KEGG_HYPERTROPHIC_CARDIOMYOPATHY_HCM		5.903	4.537	1.952	14.439			REACTOME_MUSCLE_CONTRACTION		10.301	8.151	4.461	22.893			WP_WNT_SIGNALING_PATHWAY_AND_PLURIPOTENCY	1.878	6.404	4.481	2.828	11.061
KEGG_BASAL_CELL_CARCINOMA		5.454	2.262	4.975	6.541			REACTOME_INFECTIOUS_DISEASE	2.162	10.179	6.377	2.276	21.245			WP_PRIMARY_FOCAL_SEGMENTAL_GLOMERULOSCLEROSIS_FSGS	4.547	6.266	6.125		10.033
KEGG_ENDOCYTOSIS	1.843	5.398	5.615	5.265	22.17			REACTOME_RAC1_GTPASE_CYCLE	3.06	9.802	8.21	1.947	29.817			WP_BREAST_CANCER_PATHWAY	1.374	6.266	3.724	3.834	10.145
KEGG_CHRONIC_MYELOID_LEUKEMIA	1.333	5.348	1.52	1.591	9.177			REACTOME_RHOA_GTPASE_CYCLE	3.114	9.754	5.793	2.751	17.481			WP_ENDOMETRIAL_CANCER	2.059	5.81	2.24	2.828	7.791
KEGG_PHOSPHATIDYLINOSITOL_SIGNALING_SYSTEM	1.303	5.136	4.983		7.43			REACTOME_CDC42_GTPASE_CYCLE	2.412	8.98	5.793	2.24	22.125			WP_CIRCADIAN_RHYTHM_RELATED_GENES		5.81	2.919		9.342
KEGG_PROGESTERONE_MEDIATED_OOCYTE_MATURATION		5.136	2.377	3.084	4.662			REACTOME_ION_CHANNEL_TRANSPORT	1.47	8.615	3.071		28.575			WP_HAIR_FOLLICLE_DEVELOPMENT_CYTODIFFERENTIATION_PART_3_OF_3		5.739	2.948	1.666	7.239
KEGG_VASCULAR_SMOOTH_MUSCLE_CONTRACTION		5.067	5.89	1.397	9.775			REACTOME_DISEASES_OF_METABOLISM	2.259	8.443	3.061	1.947	11.061			WP_SPINAL_CORD_INJURY		5.593	5.451	1.653	12.175
KEGG_LEUKOCYTE_TRANSENDOTHELIAL_MIGRATION		5.023	3.832	1.388	12.515			REACTOME_DEGRADATION_OF_THE_EXTRACELLULAR_MATRIX	1.844	8.418	3.777	2.48	20.285			WP_OSTEOBLAST_DIFFERENTIATION		5.593	8.289	5.589	12.791
KEGG_GNRH_SIGNALING_PATHWAY		4.736	4.043	2.711	6.777			REACTOME_CELL_JUNCTION_ORGANIZATION	1.578	8.217	4.677		9.337			WP_REGULATION_OF_ACTIN_CYTOSKELETON	1.762	5.533	5.844	2.02	15.316
KEGG_ECM_RECEPTOR_INTERACTION	2.29	4.6	3.389	2.531	14.195			REACTOME_DISEASES_OF_GLYCOSYLATION	1.822	8.217	2.857		8.826			WP_NEURAL_CREST_CELL_MIGRATION_IN_CANCER	1.351	5.524			8.129
KEGG_FC_GAMMA_R_MEDIATED_PHAGOCYTOSIS	1.519	4.459	4.869		9.1			REACTOME_LEISHMANIA_INFECTION		8.101	4.768	3.277	8.256			WP_CALCIUM_REGULATION_IN_THE_CARDIAC_CELL	1.758	5.45	10.164	3.423	18.581
KEGG_MELANOMA		4.228		2.895	10.998			REACTOME_CARDIAC_CONDUCTION		8.101	5.943	4.496	17.654			WP_AMPACTIVATED_PROTEIN_KINASE_AMPK_SIGNALING	1.486	5.441	4.023		8.045
KEGG_COLORECTAL_CANCER	3.586	4.228			8.262			REACTOME_ADAPTIVE_IMMUNE_SYSTEM	1.77	7.966	8.305	1.812	24.967			WP_ENVELOPE_PROTEINS_AND_THEIR_POTENTIAL_ROLES_IN_EDMD_PHYSIOPATHOLOGY	1.851	5.318	1.616	2.089	1.763
KEGG_TYPE_II_DIABETES_MELLITUS	1.804	4.052	5.387		7.606			REACTOME_STIMULI_SENSING_CHANNELS		7.728	2.545		15.619			WP_ENDODERM_DIFFERENTIATION	2.7	5.305	3.724	5.855	11.698
KEGG_CELL_CYCLE	1.628	4.052			4.927			REACTOME_FACTORS_INVOLVED_IN_MEGAKARYOCYTE_DEVELOPMENT_AND_PLATELET_PRODUCTION	5.257	7.701	2.094	2.109	3.319			WP_WNT_SIGNALING	1.744	5.191	4.423	1.306	13.158
KEGG_NEUROTROPHIN_SIGNALING_PATHWAY	2.645	4.015	3.419	2.173	11.291			REACTOME_INTEGRATION_OF_ENERGY_METABOLISM		7.577	10.112	2.222	12.372			WP_ESC_PLURIPOTENCY_PATHWAYS		5.14	3.94	4.161	11.78
KEGG_ADIPOCYTOKINE_SIGNALING_PATHWAY	1.444	3.899	3.256		7.865			REACTOME_DEACTIVATION_OF_THE_BETA_CATENIN_TRANSACTIVATING_COMPLEX		7.496			1.346			WP_NEURAL_CREST_CELL_MIGRATION_DURING_DEVELOPMENT	1.38	5.098			6.695
KEGG_P53_SIGNALING_PATHWAY		3.84			5.477			REACTOME_SLC_MEDIATED_TRANSMEMBRANE_TRANSPORT		7.277	5.948		27.744			WP_TCELL_ANTIGEN_RECEPTOR_TCR_SIGNALING_PATHWAY		5.057	2.859		5.518
KEGG_LONG_TERM_POTENTIATION		3.713	5.415	3.579	9.177			REACTOME_GPCR_LIGAND_BINDING		7.183	5.961	7.344	16.381			WP_REGULATION_OF_MICROTUBULE_CYTOSKELETON		5.045	1.94		6.247
KEGG_TASTE_TRANSDUCTION		3.687		1.477	2.034			REACTOME_INNATE_IMMUNE_SYSTEM		7.136	9.301	1.956	42.843			WP_CILIARY_LANDSCAPE		4.971	2.934		7.379
KEGG_GLIOMA		3.422		1.762	9.588			REACTOME_GLYCOSAMINOGLYCAN_METABOLISM		7.051	1.99		13.595			WP_TGFBETA_RECEPTOR_SIGNALING		4.948	2.472	1.305	8.216
KEGG_CHEMOKINE_SIGNALING_PATHWAY	2.266	3.409	4.04	2.107	13.145			REACTOME_ECM_PROTEOGLYCANS	2.259	6.797	2.017	2.373	18.055			WP_LNCRNA_INVOLVEMENT_IN_CANONICAL_WNT_SIGNALING_AND_COLORECTAL_CANCER		4.923	2.819	1.487	6.263
KEGG_PATHOGENIC_ESCHERICHIA_COLI_INFECTION	1.628	3.409		1.402	2.372			REACTOME_METABOLISM_OF_LIPIDS	2.057	6.751	7.847	1.837	38.474			WP_INTEGRATED_BREAST_CANCER_PATHWAY		4.923	3.41		11.872
KEGG_VEGF_SIGNALING_PATHWAY		3.384	1.832		5.821			REACTOME_PLATELET_HOMEOSTASIS		6.629	3.381		8.086			WP_MELANOMA		4.827			6.28
KEGG_ACUTE_MYELOID_LEUKEMIA		3.357			10.144			REACTOME_RAB_REGULATION_OF_TRAFFICKING	1.638	6.56	1.446		4.413			WP_NEPHROTIC_SYNDROME	3.144	4.709	3.85		6.447
KEGG_OOCYTE_MEIOSIS		3.16	1.481	3.556	6.205			REACTOME_SEMAPHORIN_INTERACTIONS	5.018	6.469	3.041	1.675	10.83			WP_PATHWAYS_REGULATING_HIPPO_SIGNALING	2.98	4.586	7.936	5.589	18.073
KEGG_MTOR_SIGNALING_PATHWAY	1.689	3.068	1.412		5.32			REACTOME_TRANSPORT_OF_INORGANIC_CATIONS_ANIONS_AND_AMINO_ACIDS_OLIGOPEPTIDES		6.418	2.545		12.146			WP_NCRNAS_INVOLVED_IN_WNT_SIGNALING_IN_HEPATOCELLULAR_CARCINOMA		4.556	2.467	1.658	4.748
KEGG_ENDOMETRIAL_CANCER	1.689	3.068	1.879	2.874	7.812			REACTOME_CELL_CELL_JUNCTION_ORGANIZATION	1.484	6.387	2.017		7.194			WP_ADIPOGENESIS	1.582	4.507	4.246		14.103
KEGG_B_CELL_RECEPTOR_SIGNALING_PATHWAY		2.895			7.599			REACTOME_G_ALPHA_S_SIGNALLING_EVENTS		6.387	5.027	3.347	10.658			WP_ANDROGEN_RECEPTOR_SIGNALING_PATHWAY		4.506	3.314		8.531
KEGG_TGF_BETA_SIGNALING_PATHWAY		2.891	3.808	1.383	9.127			REACTOME_O_GLYCOSYLATION_OF_TSR_DOMAIN_CONTAINING_PROTEINS	1.958	6.1	1.361	2.269	2.744			WP_THE_INFLUENCE_OF_LAMINOPATHIES_ON_WNT_SIGNALING		4.469			1.939
KEGG_CELL_ADHESION_MOLECULES_CAMS	2.591	2.861	5.455	5.394	16.642			REACTOME_SIGNALING_BY_HEDGEHOG		6.03	4.284	1.652	4.124			WP_FRAGILE_X_SYNDROME	2.587	4.462	8.617	1.621	12.81
KEGG_ERBB_SIGNALING_PATHWAY		2.859	1.862	2.452	12.776			REACTOME_NEPHRIN_FAMILY_INTERACTIONS	1.793	5.806			4.518			WP_HAIR_FOLLICLE_DEVELOPMENT_ORGANOGENESIS_PART_2_OF_3		4.462		2.631	8.241
KEGG_PROSTATE_CANCER		2.77	2.675	3.596	12.967			REACTOME_SIGNALING_BY_VEGF	3.483	5.779	5.562	1.419	7.083			WP_MECHANOREGULATION_AND_PATHOLOGY_OF_YAPTAZ_VIA_HIPPO_AND_NONHIPPO_MECHANISMS		4.46	1.537		7.138
KEGG_FC_EPSILON_RI_SIGNALING_PATHWAY		2.731	3.646		6.938			REACTOME_ADENYLATE_CYCLASE_ACTIVATING_PATHWAY		5.718		1.436	2.073			WP_MAJOR_RECEPTORS_TARGETED_BY_EPINEPHRINE_AND_NOREPINEPHRINE		4.44			1.809
KEGG_GLYCOSAMINOGLYCAN_BIOSYNTHESIS_CHONDROITIN_SULFATE		2.731			4.457			REACTOME_CYTOKINE_SIGNALING_IN_IMMUNE_SYSTEM	2.412	5.718	10.18	1.947	32.466			WP_CHROMOSOMAL_AND_MICROSATELLITE_INSTABILITY_IN_COLORECTAL_CANCER	4.547	4.439			6.958
KEGG_PANCREATIC_CANCER		2.657		1.657	7.343			REACTOME_ADENYLATE_CYCLASE_INHIBITORY_PATHWAY		5.684	1.729		1.873			WP_DISRUPTION_OF_POSTSYNAPTIC_SIGNALLING_BY_CNV	1.521	4.382	5.844	4.148	5.583
KEGG_LONG_TERM_DEPRESSION		2.657	7.287	2.919	7.343			REACTOME_MAPK_FAMILY_SIGNALING_CASCADES	1.975	5.65	5.303	4.385	21.395			WP_INTEGRINMEDIATED_CELL_ADHESION	1.486	4.382	7.628		10.842
KEGG_ARGININE_AND_PROLINE_METABOLISM		2.389		1.446				REACTOME_GABA_B_RECEPTOR_ACTIVATION		5.626	1.64	2.175	5.333			WP_DNA_DAMAGE_RESPONSE_ONLY_ATM_DEPENDENT	1.374	4.382	2.423	2.66	10.246
KEGG_INOSITOL_PHOSPHATE_METABOLISM	1.65	2.389	3.435		2.565			REACTOME_CHONDROITIN_SULFATE_DERMATAN_SULFATE_METABOLISM		5.626	1.778		5.196			WP_PATHWAYS_AFFECTED_IN_ADENOID_CYSTIC_CARCINOMA		4.382	2.585		7.22
KEGG_GLYCOSAMINOGLYCAN_BIOSYNTHESIS_HEPARAN_SULFATE		2.357			2.325			REACTOME_RNA_POLYMERASE_II_TRANSCRIPTION	1.499	5.626	9.166	2.395	27.764			WP_G_PROTEIN_SIGNALING_PATHWAYS	2.556	4.268	7.628	3.084	8.819
KEGG_GLYCEROPHOSPHOLIPID_METABOLISM		2.339	1.398		5.681			REACTOME_NETRIN_1_SIGNALING	3.836	5.626	6.119	3.133	11.883			WP_THE_OVERLAP_BETWEEN_SIGNAL_TRANSDUCTION_PATHWAYS_THAT_CONTRIBUTE_TO_A_RANGE_OF_LMNA_LAMINOPATHIES		4.181	1.929		3.484
KEGG_HEDGEHOG_SIGNALING_PATHWAY		2.297	4.574	4.968	4.662			REACTOME_ANTI_INFLAMMATORY_RESPONSE_FAVOURING_LEISHMANIA_PARASITE_INFECTION		5.626	3.313	2.191	3.563			WP_NETRINUNC5B_SIGNALING_PATHWAY	5.691	4.141	3.94		6.263
KEGG_ALZHEIMERS_DISEASE		2.278	1.52		6.293			REACTOME_SIGNALING_BY_WNT	1.958	5.55	4.467		8.395			WP_PANCREATIC_ADENOCARCINOMA_PATHWAY	2.118	4.109	1.74		7.239
KEGG_CARDIAC_MUSCLE_CONTRACTION		2.27		2.048	7.478			REACTOME_INTRA_GOLGI_AND_RETROGRADE_GOLGI_TO_ER_TRAFFIC	2.287	5.55		2.077	7.178			WP_CHEMOKINE_SIGNALING_PATHWAY	2.037	4.049	4.176	2.19	10.832
KEGG_THYROID_CANCER		2.135		1.474	5.62			REACTOME_INTRACELLULAR_SIGNALING_BY_SECOND_MESSENGERS	2.428	5.55	9.166	1.991	21.245			WP_TCELL_ANTIGEN_RECEPTOR_TCR_PATHWAY_DURING_STAPHYLOCOCCUS_AUREUS_INFECTION		4.045	1.449		6.202
KEGG_GLYCEROLIPID_METABOLISM		2.125			4.141			REACTOME_O_LINKED_GLYCOSYLATION	1.77	5.519	2.777	2.569	9.445			WP_MESODERMAL_COMMITMENT_PATHWAY	2.118	4.008	3.754	2.379	10.767
KEGG_O_GLYCAN_BIOSYNTHESIS		2.07	1.984	2.228	3.97			REACTOME_NON_INTEGRIN_MEMBRANE_ECM_INTERACTIONS	2.048	5.514	1.451		10.69			WP_CELL_CYCLE	1.685	4.008			4.645
KEGG_APOPTOSIS		1.966	3.256		5.778			REACTOME_POTASSIUM_CHANNELS		5.435	5.758	2.286	13.479			WP_ECTODERM_DIFFERENTIATION	1.486	4.006	10.413	2.089	17.044
KEGG_AMYOTROPHIC_LATERAL_SCLEROSIS_ALS		1.929	2.371	3.556	6.938			REACTOME_DISEASES_ASSOCIATED_WITH_O_GLYCOSYLATION_OF_PROTEINS	1.909	5.43	1.911	1.593	6.639			WP_IL4_SIGNALING_PATHWAY		3.923		1.351	3.199
KEGG_NON_SMALL_CELL_LUNG_CANCER		1.885	2.86	1.446	9.462			REACTOME_GABA_RECEPTOR_ACTIVATION		5.43	1.418	3.377	8.269			WP_RAS_SIGNALING	1.486	3.748	3.897	3.272	18.81
KEGG_ABC_TRANSPORTERS		1.842	6.397		6.255			REACTOME_SENSORY_PROCESSING_OF_SOUND		5.387	3.342		8.553			WP_PROTEOGLYCAN_BIOSYNTHESIS	1.31	3.748
KEGG_EPITHELIAL_CELL_SIGNALING_IN_HELICOBACTER_PYLORI_INFECTION		1.787		2.336	4.476			REACTOME_G_PROTEIN_MEDIATED_EVENTS	1.638	5.252	4.325	1.364	6.91			WP_ASSOCIATION_BETWEEN_PHYSICOCHEMICAL_FEATURES_AND_TOXICITY_ASSOCIATED_PATHWAYS	2.556	3.643		1.608	7.432
KEGG_PRION_DISEASES		1.766		1.318	1.72			REACTOME_SIGNALING_BY_MET		5.241	1.572	1.387	15.314			WP_HUMAN_THYROID_STIMULATING_HORMONE_TSH_SIGNALING_PATHWAY	1.962	3.643	3.493	2.077	4.752
KEGG_RENAL_CELL_CARCINOMA		1.718	5.415		8.534			REACTOME_PHOSPHOLIPID_METABOLISM		5.241	4.079		14.162			WP_SPLICING_FACTOR_NOVA_REGULATED_SYNAPTIC_PROTEINS	2.587	3.607	7.324	1.636	11.329
KEGG_NOTCH_SIGNALING_PATHWAY		1.708	2.137		2.486			REACTOME_METABOLISM_OF_CARBOHYDRATES		5.241	4.858		15.733			WP_ENDOTHELIN_PATHWAYS	1.521	3.607	4.141	2.589	5.583
KEGG_SNARE_INTERACTIONS_IN_VESICULAR_TRANSPORT		1.609			2.231			REACTOME_ADHERENS_JUNCTIONS_INTERACTIONS	1.529	5.23			4.252			WP_KIT_RECEPTOR_SIGNALING_PATHWAY	2.118	3.565	2.369	1.726	5.986
KEGG_JAK_STAT_SIGNALING_PATHWAY		1.574			10.035			REACTOME_NCAM_SIGNALING_FOR_NEURITE_OUT_GROWTH	1.982	5.177	3.073	3.277	10.366			WP_TGFBETA_SIGNALING_PATHWAY		3.533	5.755		14.984
KEGG_ALDOSTERONE_REGULATED_SODIUM_REABSORPTION		1.417	2.425		6.705			REACTOME_G_ALPHA_12_13_SIGNALLING_EVENTS	3.495	5.177	4.307	1.383	6.311			WP_MICRORNAS_IN_CARDIOMYOCYTE_HYPERTROPHY	1.495	3.502	3.322		10.825
KEGG_GLYCINE_SERINE_AND_THREONINE_METABOLISM		1.415			1.339			REACTOME_OPIOID_SIGNALLING	2.026	5.101	5.995	2.094	9.119			WP_SYNAPTIC_VESICLE_PATHWAY		3.502	1.391		6.263
KEGG_ALANINE_ASPARTATE_AND_GLUTAMATE_METABOLISM		1.365	1.314		2.998			REACTOME_CHROMATIN_MODIFYING_ENZYMES		5.078	1.928		4.189			WP_WNT_SIGNALING_PATHWAY_NETPATH	1.71	3.426	1.766		6.084
KEGG_AMINO_SUGAR_AND_NUCLEOTIDE_SUGAR_METABOLISM		1.345			2.026			REACTOME_NEUTROPHIL_DEGRANULATION		5.049	5.903	2.48	25.767			WP_NONSMALL_CELL_LUNG_CANCER		3.417	1.519		8.487
KEGG_PPAR_SIGNALING_PATHWAY		1.345			3.037			REACTOME_ONCOGENIC_MAPK_SIGNALING		5.038			7.073			WP_GASTRIN_SIGNALING_PATHWAY	1.374	3.407	3.673	1.344	9.705
KEGG_BIOSYNTHESIS_OF_UNSATURATED_FATTY_ACIDS		1.345			1.421			REACTOME_SIGNALING_BY_BRAF_AND_RAF_FUSIONS	1.484	5.019	1.64		6.601			WP_CORTICOTROPINRELEASING_HORMONE_SIGNALING_PATHWAY		3.386	3.228		6.654
KEGG_SULFUR_METABOLISM		1.325						REACTOME_RHOC_GTPASE_CYCLE	1.822	4.982	1.718	1.942	8.533			WP_TCELL_RECEPTOR_AND_COSTIMULATORY_SIGNALING	1.655	3.37	1.425		4.017
KEGG_CIRCADIAN_RHYTHM_MAMMAL		1.325						REACTOME_ADORA2B_MEDIATED_ANTI_INFLAMMATORY_CYTOKINES_PRODUCTION		4.87	4.564	3.093	6.874			WP_VITAMIN_D_IN_INFLAMMATORY_DISEASES		3.359	1.842		2.902
KEGG_VIRAL_MYOCARDITIS	2.616	1.325	6.679	4.249	9.177			REACTOME_CLATHRIN_MEDIATED_ENDOCYTOSIS		4.788	1.526	2.825	7.641			WP_NEOVASCULARISATION_PROCESSES		3.359			6.263
KEGG_GLYCOSPHINGOLIPID_BIOSYNTHESIS_LACTO_AND_NEOLACTO_SERIES			3.808		2.325			REACTOME_REGULATION_OF_INSULIN_SECRETION		4.674	10.206	1.865	10.282			WP_SUDDEN_INFANT_DEATH_SYNDROME_SIDS_SUSCEPTIBILITY_PATHWAYS	2.525	3.343	3.527	4.791	13.836
KEGG_LYSINE_DEGRADATION					4.401			REACTOME_ELASTIC_FIBRE_FORMATION	1.83	4.649	3.074		5.561			WP_PATHOGENIC_ESCHERICHIA_COLI_INFECTION	1.679	3.314		1.351	2.398
KEGG_NATURAL_KILLER_CELL_MEDIATED_CYTOTOXICITY			3.85		6.471			REACTOME_RHOB_GTPASE_CYCLE	2.363	4.613	1.482	1.553	10.756			WP_THYMIC_STROMAL_LYMPHOPOIETIN_TSLP_SIGNALING_PATHWAY	1.313	3.238			4.823
KEGG_TAURINE_AND_HYPOTAURINE_METABOLISM					2.272			REACTOME_DEFECTIVE_EXT2_CAUSES_EXOSTOSES_2		4.566			2.504			WP_AGERAGE_PATHWAY	2.587	3.223	2.585	1.632	6.084
KEGG_VALINE_LEUCINE_AND_ISOLEUCINE_DEGRADATION					1.333			REACTOME_REPRESSION_OF_WNT_TARGET_GENES		4.566			3.217			WP_PROLACTIN_SIGNALING_PATHWAY	1.374	3.223	3.05	3.062	7.186
KEGG_ETHER_LIPID_METABOLISM			1.801		2.351			REACTOME_RAB_GEFS_EXCHANGE_GTP_FOR_GDP_ON_RABS	1.59	4.496			3.364			WP_HEAD_AND_NECK_SQUAMOUS_CELL_CARCINOMA		3.223	4.081	1.91	5.596
KEGG_AUTOIMMUNE_THYROID_DISEASE			2.416	2.874	4.744			REACTOME_CLASS_A_1_RHODOPSIN_LIKE_RECEPTORS		4.469	1.929	2.078	10.407			WP_SENESCENCE_AND_AUTOPHAGY_IN_CANCER		3.218			6.557
KEGG_UBIQUITIN_MEDIATED_PROTEOLYSIS					6.276			REACTOME_SIGNALING_BY_INTERLEUKINS	2.912	4.469	7.103		23.123			WP_PATHWAYS_IN_CLEAR_CELL_RENAL_CELL_CARCINOMA		3.194	3.508		7.55
KEGG_CYSTEINE_AND_METHIONINE_METABOLISM					2.244			REACTOME_SENSORY_PROCESSING_OF_SOUND_BY_OUTER_HAIR_CELLS_OF_THE_COCHLEA		4.466	1.991		6.077			WP_B_CELL_RECEPTOR_SIGNALING_PATHWAY	3.595	3.186	4.401		9.623
KEGG_OXIDATIVE_PHOSPHORYLATION					1.545			REACTOME_L1CAM_INTERACTIONS	1.638	4.434	3.224	3.347	10.547			WP_NOCGMPPKG_MEDIATED_NEUROPROTECTION	1.31	3.186		1.507	6.447
KEGG_ARACHIDONIC_ACID_METABOLISM					3.878			REACTOME_TCF_DEPENDENT_SIGNALING_IN_RESPONSE_TO_WNT		4.405			3.214			WP_CANONICAL_AND_NONCANONICAL_TGFB_SIGNALING		3.178	1.593		2.651
KEGG_PANTOTHENATE_AND_COA_BIOSYNTHESIS					1.717			REACTOME_HEDGEHOG_OFF_STATE		4.314	2.708	1.727	2.863			WP_NANOPARTICLE_TRIGGERED_AUTOPHAGIC_CELL_DEATH		3.156			3.782
KEGG_TYROSINE_METABOLISM					3.61			REACTOME_DISEASES_ASSOCIATED_WITH_GLYCOSAMINOGLYCAN_METABOLISM		4.312			4.501			WP_ANGIOGENESIS		3.156			5.268
KEGG_BLADDER_CANCER			1.359	1.755	3.61			REACTOME_MET_PROMOTES_CELL_MOTILITY	1.909	4.312	2.194	1.672	12.575			WP_G13_SIGNALING_PATHWAY	1.995	3.152			3.258
KEGG_RENIN_ANGIOTENSIN_SYSTEM					2.122			REACTOME_DAG_AND_IP3_SIGNALING	1.334	4.312	3.373	1.672	4.501			WP_MRNA_PROCESSING		3.152			3.422
KEGG_HEMATOPOIETIC_CELL_LINEAGE			2.761		8.955			REACTOME_SIGNALING_BY_NTRKS	2.273	4.312	3.155	2.595	5.913			WP_VITAMIN_DSENSITIVE_CALCIUM_SIGNALING_IN_DEPRESSION		3.152	1.888	1.666	5.576
KEGG_CYTOKINE_CYTOKINE_RECEPTOR_INTERACTION			1.342		16.883			REACTOME_G_ALPHA_I_SIGNALLING_EVENTS		4.242	6.077	2.798	22.277			WP_MONOAMINE_TRANSPORT		3.13	2.978	1.325	4.038
KEGG_PROXIMAL_TUBULE_BICARBONATE_RECLAMATION					1.75			REACTOME_GLUCAGON_LIKE_PEPTIDE_1_GLP1_REGULATES_INSULIN_SECRETION		4.217	4	2.191	3.266			WP_NEURAL_CREST_DIFFERENTIATION		3.023	4.182	3.551	10.063
KEGG_COMPLEMENT_AND_COAGULATION_CASCADES					3.037			REACTOME_NCAM1_INTERACTIONS	1.884	4.217	2.708	1.643	9.361			WP_SYNAPTIC_SIGNALING_PATHWAYS_ASSOCIATED_WITH_AUTISM_SPECTRUM_DISORDER	2.338	2.999	2.313	1.434	7.789
KEGG_ONE_CARBON_POOL_BY_FOLATE	2.159							REACTOME_G_ALPHA_Q_SIGNALLING_EVENTS		4.217	7.023	3.377	9.389			WP_NUCLEAR_RECEPTORS_METAPATHWAY	1.495	2.946	6.398	1.357	16.226
KEGG_NITROGEN_METABOLISM					1.325			REACTOME_CRMPS_IN_SEMA3A_SIGNALING	2.048	4.163			2.714			WP_EGFR_TYROSINE_KINASE_INHIBITOR_RESISTANCE		2.841	2.275	4.791	13.89
KEGG_PRIMARY_IMMUNODEFICIENCY			1.687		1.72			REACTOME_NRAGE_SIGNALS_DEATH_THROUGH_JNK	2.644	4.163	3.313		6.53			WP_HEPATITIS_B_INFECTION		2.829	2.313	1.608	11.872
KEGG_GLYCOLYSIS_GLUCONEOGENESIS					2.232			REACTOME_HIGHLY_SODIUM_PERMEABLE_POSTSYNAPTIC_ACETYLCHOLINE_NICOTINIC_RECEPTORS		4.163			2.15			WP_PROSTAGLANDIN_SYNTHESIS_AND_REGULATION		2.771		1.578	3.545
KEGG_METABOLISM_OF_XENOBIOTICS_BY_CYTOCHROME_P450					1.386			REACTOME_NITRIC_OXIDE_STIMULATES_GUANYLATE_CYCLASE		4.119	1.729		4.07			WP_INITIATION_OF_TRANSCRIPTION_AND_TRANSLATION_ELONGATION_AT_THE_HIV1_LTR	1.486	2.693			2.254
KEGG_GALACTOSE_METABOLISM					2.325			REACTOME_P75_NTR_RECEPTOR_MEDIATED_SIGNALLING	3.744	4.119	2.068		6.373			WP_ONCOSTATIN_M_SIGNALING_PATHWAY	1.49	2.686	1.326		4.09
KEGG_DORSO_VENTRAL_AXIS_FORMATION			3.256	2.545	5.487			REACTOME_PROGRAMMED_CELL_DEATH		4.09	2.422		10.703			WP_UREA_CYCLE_AND_METABOLISM_OF_AMINO_GROUPS		2.676			1.478
KEGG_NOD_LIKE_RECEPTOR_SIGNALING_PATHWAY					2.232			REACTOME_AUTOPHAGY		4.065	1.412		1.604			WP_TYPE_I_INTERFERON_INDUCTION_AND_SIGNALING_DURING_SARSCOV2_INFECTION		2.658			1.866
KEGG_STEROID_HORMONE_BIOSYNTHESIS					1.78			REACTOME_ORGANELLE_BIOGENESIS_AND_MAINTENANCE		4.049	3.708		4.429			WP_HIPPOMERLIN_SIGNALING_DYSREGULATION	1.679	2.651	5.769	4.096	17.044
KEGG_INTESTINAL_IMMUNE_NETWORK_FOR_IGA_PRODUCTION			3.256	2.995	5.456			REACTOME_TBC_RABGAPS		4.041			3.012			WP_WNT_SIGNALING_IN_KIDNEY_DISEASE		2.633	1.982	1.722	4.114
KEGG_GLYCOSAMINOGLYCAN_DEGRADATION					2.034			REACTOME_DEATH_RECEPTOR_SIGNALLING	2.656	4.026	3.31		9.581			WP_CARDIAC_HYPERTROPHIC_RESPONSE		2.633	3.602	1.322	8.455
KEGG_GLYCOSPHINGOLIPID_BIOSYNTHESIS_GLOBO_SERIES					1.477			REACTOME_RHO_GTPASE_EFFECTORS	2.644	3.993	3.063		5.086			WP_REGULATORY_CIRCUITS_OF_THE_STAT3_SIGNALING_PATHWAY	1.351	2.58		1.404	7.78
KEGG_PHENYLALANINE_METABOLISM			1.54		4			REACTOME_CA_DEPENDENT_EVENTS	1.43	3.972	3.07	1.751	4.092			WP_IL3_SIGNALING_PATHWAY		2.52		2.019	7.565
KEGG_TRYPTOPHAN_METABOLISM					2.026			REACTOME_SIGNALING_BY_MODERATE_KINASE_ACTIVITY_BRAF_MUTANTS		3.955	1.556	1.56	2.895			WP_NRF2ARE_REGULATION		2.475			2.715
KEGG_SYSTEMIC_LUPUS_ERYTHEMATOSUS				1.477				REACTOME_PECAM1_INTERACTIONS		3.942			1.657			WP_CANCER_IMMUNOTHERAPY_BY_PD1_BLOCKADE		2.475			4.017
KEGG_HUNTINGTONS_DISEASE			2.761		5.284			REACTOME_MOLECULES_ASSOCIATED_WITH_ELASTIC_FIBRES	1.404	3.871	2.392		5.79			WP_HEPATITIS_C_AND_HEPATOCELLULAR_CARCINOMA	1.758	2.468	1.458		5.456
KEGG_BETA_ALANINE_METABOLISM					2.999			REACTOME_GOLGI_TO_ER_RETROGRADE_TRANSPORT	1.533	3.856		2.222	4.092			WP_STRUCTURAL_PATHWAY_OF_INTERLEUKIN_1_IL1		2.468			2.902
KEGG_STARCH_AND_SUCROSE_METABOLISM					2.034			REACTOME_EPH_EPHRIN_SIGNALING		3.856	2.24	1.643	11.872			WP_GPCRS_CLASS_C_METABOTROPIC_GLUTAMATE_PHEROMONE		2.438	4.081	1.91	4.487
KEGG_BASAL_TRANSCRIPTION_FACTORS					1.356			REACTOME_SARS_COV_INFECTIONS		3.819	2.057		5.472			WP_DEREGULATION_OF_RAB_AND_RAB_EFFECTOR_GENES_IN_BLADDER_CANCER		2.438	3.188	1.91	3.628
KEGG_VASOPRESSIN_REGULATED_WATER_REABSORPTION			1.762	2.433	2.827			REACTOME_ACTIVATION_OF_NMDA_RECEPTORS_AND_POSTSYNAPTIC_EVENTS	1.967	3.742	4.026	5.031	6.798			WP_OXIDATIVE_DAMAGE		2.434			1.844
KEGG_LEISHMANIA_INFECTION			4.043	4.214	4.904			REACTOME_RHO_GTPASES_ACTIVATE_IQGAPS		3.714						WP_UREA_CYCLE_AND_ASSOCIATED_PATHWAYS		2.394
KEGG_LYSOSOME			2.761	1.755	6.563			REACTOME_MAP2K_AND_MAPK_ACTIVATION		3.682	2.255		2.617			WP_GPCRS_CLASS_B_SECRETINLIKE		2.394	2.31		4.487
KEGG_RETINOL_METABOLISM					1.473			REACTOME_RET_SIGNALING		3.682	1.769	1.681	3.071			WP_STEROL_REGULATORY_ELEMENTBINDING_PROTEINS_SREBP_SIGNALLING		2.37			2.932
KEGG_TOLL_LIKE_RECEPTOR_SIGNALING_PATHWAY					4.478			REACTOME_CLASS_I_MHC_MEDIATED_ANTIGEN_PROCESSING_PRESENTATION		3.675	3.071		9.647			WP_RESISTIN_AS_A_REGULATOR_OF_INFLAMMATION		2.36			2.753
KEGG_GLYCOSPHINGOLIPID_BIOSYNTHESIS_GANGLIO_SERIES					6.165			REACTOME_OTHER_SEMAPHORIN_INTERACTIONS		3.655	1.357		4.134			WP_HOSTPATHOGEN_INTERACTION_OF_HUMAN_CORONA_VIRUSES_INTERFERON_INDUCTION		2.36			2.281
KEGG_CITRATE_CYCLE_TCA_CYCLE					2.159			REACTOME_CELL_DEATH_SIGNALLING_VIA_NRAGE_NRIF_AND_NADE	2.259	3.648	2.44		5.353			WP_AIRWAY_SMOOTH_MUSCLE_CELL_CONTRACTION	1.351	2.338			2.042
KEGG_GRAFT_VERSUS_HOST_DISEASE			4.527	3.316	5.577			REACTOME_CD28_CO_STIMULATION	1.529	3.616	2.751		3.09			WP_VITAMIN_D_RECEPTOR_PATHWAY		2.338	3.179		9.696
KEGG_BUTANOATE_METABOLISM					2.244			REACTOME_PROTEIN_PROTEIN_INTERACTIONS_AT_SYNAPSES		3.582	7.728	7.116	10.933			WP_AMPLIFICATION_AND_EXPANSION_OF_ONCOGENIC_PATHWAYS_AS_METASTATIC_TRAITS		2.338			5.032
KEGG_GLYCOSAMINOGLYCAN_BIOSYNTHESIS_KERATAN_SULFATE					2.493			REACTOME_METABOLISM_OF_VITAMINS_AND_COFACTORS	1.413	3.519	4.043	1.57	9.038			WP_NOTCH_SIGNALING_PATHWAY_NETPATH		2.338	1.421		4.017
KEGG_MISMATCH_REPAIR					1.325			REACTOME_EPHB_MEDIATED_FORWARD_SIGNALING		3.508			4.908			WP_RELATIONSHIP_BETWEEN_INFLAMMATION_COX2_AND_EGFR		2.32			2.395
KEGG_PROPANOATE_METABOLISM					2.351			REACTOME_CHONDROITIN_SULFATE_BIOSYNTHESIS		3.508	2.542	1.71	4.62			WP_APOPTOSIS		2.313	2.199		7.186
KEGG_CYTOSOLIC_DNA_SENSING_PATHWAY					1.477			REACTOME_ASPARAGINE_N_LINKED_GLYCOSYLATION		3.475	3.8		9.168			WP_7Q1123_COPY_NUMBER_VARIATION_SYNDROME		2.305	1.826		3.227
KEGG_SPHINGOLIPID_METABOLISM					3.538			REACTOME_INTEGRIN_SIGNALING		3.475	1.952		4.937			WP_SIGNALING_OF_HEPATOCYTE_GROWTH_FACTOR_RECEPTOR		2.305	2.819		4.261
KEGG_TYPE_I_DIABETES_MELLITUS			5.768	5.736	9.467			REACTOME_CIRCADIAN_CLOCK		3.429	2.722		4.276			WP_LEPTIN_SIGNALING_PATHWAY	2.358	2.26	1.762	1.91	6.107
KEGG_PEROXISOME			1.371		2.591			REACTOME_COLLAGEN_FORMATION	2.508	3.427	8.151		16.899			WP_WNTBETACATENIN_SIGNALING_PATHWAY_IN_LEUKEMIA	1.744	2.241	2.166		8.134
KEGG_SPLICEOSOME	1.613				2.244			REACTOME_INTERLEUKIN_37_SIGNALING		3.367	2.44		3.585			WP_TGFB_SIGNALING_IN_THYROID_CELLS_FOR_EPITHELIALMESENCHYMAL_TRANSITION	2.902	2.239			2.444
KEGG_GLYCOSYLPHOSPHATIDYLINOSITOL_GPI_ANCHOR_BIOSYNTHESIS					1.516			REACTOME_TRP_CHANNELS		3.361			6.267			WP_INTERFERON_TYPE_I_SIGNALING_PATHWAYS	2.216	2.236	2.619		5.154
KEGG_ALLOGRAFT_REJECTION			3.435	3.556	8.036			REACTOME_REGULATION_OF_INSULIN_LIKE_GROWTH_FACTOR_IGF_TRANSPORT_AND_UPTAKE_BY_INSULIN_LIKE_GROWTH_FACTOR_BINDING_PROTEINS_IGFBPS		3.343	1.99		9.028			WP_EGFEGFR_SIGNALING_PATHWAY	2.05	2.236	7.726	3.683	13.117
KEGG_HISTIDINE_METABOLISM					2.928			REACTOME_CA2_PATHWAY	2.001	3.34	2.134		8.495			WP_RANKLRANK_RECEPTOR_ACTIVATOR_OF_NFKB_LIGAND_SIGNALING_PATHWAY		2.236			4.621
KEGG_ASTHMA			2.667	3.969	3.338			REACTOME_SYNTHESIS_OF_PIPS_AT_THE_PLASMA_MEMBRANE	1.656	3.329	2.578		4.681			WP_PRADERWILLI_AND_ANGELMAN_SYNDROME		2.224	2.118	2.102	5.034
KEGG_RIBOSOME					4.331			REACTOME_IONOTROPIC_ACTIVITY_OF_KAINATE_RECEPTORS		3.276			2.858			WP_CAMKK2_PATHWAY	2.103	2.178	1.593		2.365
KEGG_HOMOLOGOUS_RECOMBINATION					2.538			REACTOME_ION_HOMEOSTASIS		3.262	3.655	1.364	9.773			WP_GENES_TARGETED_BY_MIRNAS_IN_ADIPOCYTES	1.31	2.146			1.736
KEGG_PROTEASOME					1.492			REACTOME_EPHA_MEDIATED_GROWTH_CONE_COLLAPSE	2.244	3.262	1.834	2.648	6.798			WP_MIR5093P_ALTERATION_OF_YAP1ECM_AXIS		2.146			2.875
KEGG_PYRIMIDINE_METABOLISM					2.672			REACTOME_INTRAFLAGELLAR_TRANSPORT		3.262			1.409			WP_ERBB_SIGNALING_PATHWAY		2.14	2.029	1.651	10.919
KEGG_MATURITY_ONSET_DIABETES_OF_THE_YOUNG					1.516			REACTOME_RHOH_GTPASE_CYCLE		3.244	1.909		1.741			WP_SCFA_AND_SKELETAL_MUSCLE_SUBSTRATE_METABOLISM		2.121
KEGG_ANTIGEN_PROCESSING_AND_PRESENTATION			3.225	3.612	2.798			REACTOME_CLASS_B_2_SECRETIN_FAMILY_RECEPTORS		3.238	4.564	6.815	4.905			WP_PRION_DISEASE_PATHWAY		2.121			5.576
KEGG_VIBRIO_CHOLERAE_INFECTION					5.539			REACTOME_MITOCHONDRIAL_BIOGENESIS		3.238	1.496		1.657			WP_BONE_MORPHOGENIC_PROTEIN_BMP_SIGNALLING_AND_REGULATION		2.12			2.42
								REACTOME_COLLAGEN_DEGRADATION	1.492	3.225	3.041		10.116			WP_BIOMARKERS_FOR_UREA_CYCLE_DISORDERS		2.12
								REACTOME_HEPARAN_SULFATE_HEPARIN_HS_GAG_METABOLISM		3.2			4.392			WP_APOPTOSIS_MODULATION_AND_SIGNALING		2.074			5.268
								REACTOME_INTEGRIN_CELL_SURFACE_INTERACTIONS	2.092	3.166	3.429	2.191	12.103			WP_ENERGY_METABOLISM		2.069			3.619
								REACTOME_NEUREXINS_AND_NEUROLIGINS		3.131	7.981	5.385	6.502			WP_SLEEP_REGULATION		2.066			2.569
								REACTOME_DOWNREGULATION_OF_SMAD2_3_SMAD4_TRANSCRIPTIONAL_ACTIVITY		3.129	1.661		3.137			WP_CILIOPATHIES		2.065	3.57		5.562
								REACTOME_TRANSCRIPTIONAL_REGULATION_BY_TP53	1.77	3.09	3.342		8.814			WP_GPCRS_OTHER		2.046	4.627		4.728
								REACTOME_ANTIGEN_PROCESSING_UBIQUITINATION_PROTEASOME_DEGRADATION		3.09	1.843		9.26			WP_NANOPARTICLEMEDIATED_ACTIVATION_OF_RECEPTOR_SIGNALING		2.04	1.425	2.038	2.325
								REACTOME_PLATELET_AGGREGATION_PLUG_FORMATION		3.081	1.808		4.295			WP_NONGENOMIC_ACTIONS_OF_125_DIHYDROXYVITAMIN_D3	1.437	2.031	3.316	2.02	4.827
								REACTOME_PRESYNAPTIC_DEPOLARIZATION_AND_CALCIUM_CHANNEL_OPENING	1.54	3.077	1.322	2.222	4.399			WP_GLUCOCORTICOID_RECEPTOR_PATHWAY	1.437	2.031	1.933		5.321
								REACTOME_APOPTOSIS		3.077	2.186		9.772			WP_RETT_SYNDROME_CAUSING_GENES		2.031	2.978		11.467
								REACTOME_HS_GAG_BIOSYNTHESIS		3.077			4.66			WP_SEROTONIN_AND_ANXIETYRELATED_EVENTS		2.009	1.94	2.089	2.902
								REACTOME_FCGAMMA_RECEPTOR_FCGR_DEPENDENT_PHAGOCYTOSIS		3.075	1.572		1.727			WP_CELLTYPE_DEPENDENT_SELECTIVITY_OF_CCK2R_SIGNALING		2.009	2.755	1.305	4.728
								REACTOME_NOTCH1_INTRACELLULAR_DOMAIN_REGULATES_TRANSCRIPTION		3.068	2.886		2.554			WP_MECP2_AND_ASSOCIATED_RETT_SYNDROME	1.896	1.995	2.308		7.291
								REACTOME_COLLAGEN_BIOSYNTHESIS_AND_MODIFYING_ENZYMES	2.428	3.061	5.244		14.92			WP_EXTRACELLULAR_VESICLEMEDIATED_SIGNALING_IN_RECIPIENT_CELLS	1.626	1.986	1.901	5.589	3.222
								REACTOME_SIGNALING_BY_NTRK3_TRKC		3.059		1.85	1.433			WP_MATRIX_METALLOPROTEINASES		1.986			4.455
								REACTOME_PKA_ACTIVATION_IN_GLUCAGON_SIGNALLING		3.059	3.777	1.85				WP_EICOSANOID_METABOLISM_VIA_CYCLO_OXYGENASES_COX		1.986			2.676
								REACTOME_RAC2_GTPASE_CYCLE	3.241	3.037	2.393		8.891			WP_MICROGLIA_PATHOGEN_PHAGOCYTOSIS_PATHWAY		1.975	1.412		6.247
								REACTOME_SIGNALING_BY_ERBB4		3.03		1.768	7.359			WP_PDGF_PATHWAY		1.975			4.928
								REACTOME_SLC_TRANSPORTER_DISORDERS		3.03	4.821		7.594			WP_MBDNF_AND_PROBDNF_REGULATION_OF_GABA_NEUROTRANSMISSION		1.975		1.666	2.769
								REACTOME_SIGNALING_BY_PDGF	1.59	3.03		1.768	7.359			WP_MIR124_PREDICTED_INTERACTIONS_WITH_CELL_CYCLE_AND_DIFFERENTIATION		1.952
								REACTOME_RECYCLING_PATHWAY_OF_L1		3.01		1.45				WP_HEMATOPOIETIC_STEM_CELL_DIFFERENTIATION		1.951	1.85	1.683	3.685
								REACTOME_SIGNALING_BY_FGFR1		2.938		1.436	3.623			WP_TYPE_II_DIABETES_MELLITUS	1.878	1.918	3.236		2.902
								REACTOME_SIGNALING_BY_ERBB2	2.259	2.938	2.767	2.48	4.128			WP_DEVELOPMENT_AND_HETEROGENEITY_OF_THE_ILC_FAMILY	1.571	1.86	3.666		3.447
								REACTOME_CROSSLINKING_OF_COLLAGEN_FIBRILS	1.967	2.923	2.022		2.299			WP_OVARIAN_INFERTILITY_GENES		1.86			4.038
								REACTOME_SIGNAL_AMPLIFICATION		2.909			1.747			WP_HIPPOYAP_SIGNALING_PATHWAY		1.837			3.335
								REACTOME_NEGATIVE_REGULATION_OF_THE_PI3K_AKT_NETWORK	1.323	2.909	5.699	3.023	16.059			WP_ENDOCHONDRAL_OSSIFICATION		1.827	2.166	2.786	9.369
								REACTOME_SIGNALING_BY_TGFB_FAMILY_MEMBERS	1.463	2.901	4.637		8.203			WP_ENDOCHONDRAL_OSSIFICATION_WITH_SKELETAL_DYSPLASIAS		1.827	2.166	2.786	9.369
								REACTOME_METABOLISM_OF_RNA	1.306	2.849			6.601			WP_APOPTOSISRELATED_NETWORK_DUE_TO_ALTERED_NOTCH3_IN_OVARIAN_CANCER	1.688	1.811	1.319		5.894
								REACTOME_KINESINS	2.026	2.849		2.222	2.095			WP_REGUCALCIN_IN_PROXIMAL_TUBULE_EPITHELIAL_KIDNEY_CELLS		1.811			2.753
								REACTOME_ASSEMBLY_OF_COLLAGEN_FIBRILS_AND_OTHER_MULTIMERIC_STRUCTURES	2.026	2.849	4.409		9.417			WP_WHITE_FAT_CELL_DIFFERENTIATION		1.811	3.57		3.275
								REACTOME_SIGNALLING_TO_ERKS		2.832			2.04			WP_INFLAMMATORY_RESPONSE_PATHWAY		1.811	1.74		2.753
								REACTOME_SIGNALING_BY_WNT_IN_CANCER		2.832			2.941			WP_TUMOR_SUPPRESSOR_ACTIVITY_OF_SMARCB1		1.811		1.904	2.281
								REACTOME_CALNEXIN_CALRETICULIN_CYCLE		2.832						WP_EFFECTS_OF_NITRIC_OXIDE	1.744	1.806	1.74
								REACTOME_A_TETRASACCHARIDE_LINKER_SEQUENCE_IS_REQUIRED_FOR_GAG_SYNTHESIS		2.832	1.491		1.678			WP_EXRNA_MECHANISM_OF_ACTION_AND_BIOGENESIS		1.806
								REACTOME_AQUAPORIN_MEDIATED_TRANSPORT		2.82	3.193	2.414	1.847			WP_FTO_OBESITY_VARIANT_MECHANISM		1.806
								REACTOME_SIGNALING_BY_SCF_KIT		2.815	1.64	2.175	6.703			WP_INSULIN_SIGNALLING_IN_HUMAN_ADIPOCYTES_DIABETIC_CONDITION		1.806			1.971
								REACTOME_DISORDERS_OF_TRANSMEMBRANE_TRANSPORTERS		2.815	5.943		7.966			WP_INSULIN_SIGNALLING_IN_HUMAN_ADIPOCYTES_NORMAL_CONDITION		1.806			1.971
								REACTOME_VASOPRESSIN_REGULATES_RENAL_WATER_HOMEOSTASIS_VIA_AQUAPORINS		2.815	3.899	2.697				WP_NEURODEGENERATION_WITH_BRAIN_IRON_ACCUMULATION_NBIA_SUBTYPES_PATHWAY	1.896	1.792	1.702
								REACTOME_EPHRIN_SIGNALING		2.815			4.954			WP_HEDGEHOG_SIGNALING_PATHWAY		1.792	2.178	1.608	3.199
								REACTOME_VOLTAGE_GATED_POTASSIUM_CHANNELS		2.815	4.614	2.175	4.172			WP_GLYCEROLIPIDS_AND_GLYCEROPHOSPHOLIPIDS		1.792
								REACTOME_GLYCEROPHOSPHOLIPID_BIOSYNTHESIS		2.797	1.328		7.966			WP_RENIN_ANGIOTENSIN_ALDOSTERONE_SYSTEM_RAAS		1.792		1.608	8.129
								REACTOME_CELL_CYCLE		2.787	1.796		10.16			WP_AMINO_ACID_METABOLISM		1.79	1.343		5.065
								REACTOME_GPVI_MEDIATED_ACTIVATION_CASCADE	2.048	2.762	3.224		3.862			WP_OXIDATIVE_STRESS		1.771			1.379
								REACTOME_N_GLYCAN_TRIMMING_IN_THE_ER_AND_CALNEXIN_CALRETICULIN_CYCLE		2.762						WP_ID_SIGNALING_PATHWAY	2.118	1.737	4.081		1.658
								REACTOME_COLLAGEN_CHAIN_TRIMERIZATION	1.844	2.752	4.519		11.324			WP_MAPK_PATHWAY_IN_CONGENITAL_THYROID_CANCER		1.737
								REACTOME_PI_METABOLISM	1.656	2.752	3.482		6.233			WP_PHYSIOLOGICAL_AND_PATHOLOGICAL_HYPERTROPHY_OF_THE_HEART		1.729			4.239
								REACTOME_SYNDECAN_INTERACTIONS		2.752	1.434		2.988			WP_DIFFERENTIATION_OF_WHITE_AND_BROWN_ADIPOCYTE		1.729	2.239		3.559
								REACTOME_SIGNALING_BY_NOTCH1		2.722	4.103		4.667			WP_IL1_AND_MEGAKARYOCYTES_IN_OBESITY		1.729			1.466
								REACTOME_CELL_CYCLE_MITOTIC		2.715			6.619			WP_DNA_DAMAGE_RESPONSE		1.71			3.331
								REACTOME_DEGRADATION_OF_BETA_CATENIN_BY_THE_DESTRUCTION_COMPLEX		2.711			3.115			WP_RAC1PAK1P38MMP2_PATHWAY		1.71	1.995	2.66	6.68
								REACTOME_TRANSCRIPTIONAL_REGULATION_BY_RUNX3		2.711			7.528			WP_UREA_CYCLE_AND_RELATED_DISEASES		1.68
								REACTOME_SIGNALING_BY_KIT_IN_DISEASE		2.71		2.395	2.526			WP_BIOTIN_METABOLISM_INCLUDING_IEMS		1.68			1.726
								REACTOME_DEFECTIVE_B4GALT7_CAUSES_EDS_PROGEROID_TYPE		2.71			1.985			WP_DEVELOPMENT_OF_URETERIC_COLLECTION_SYSTEM	1.313	1.667	3.708	2.754	10.462
								REACTOME_PKA_MEDIATED_PHOSPHORYLATION_OF_CREB		2.71	2.542					WP_NOTCH_SIGNALING	1.313	1.667	2.026		2.407
								REACTOME_RESPONSE_TO_ELEVATED_PLATELET_CYTOSOLIC_CA2		2.673			4.933			WP_TRIACYLGLYCERIDE_SYNTHESIS		1.667			2.765
								REACTOME_RUNX3_REGULATES_WNT_SIGNALING		2.673			3.743			WP_EICOSANOID_SYNTHESIS		1.667			1.778
								REACTOME_BINDING_OF_TCF_LEF_CTNNB1_TO_TARGET_GENE_PROMOTERS		2.673			3.743			WP_LEPTIN_INSULIN_OVERLAP	1.351	1.666	3.036		2.651
								REACTOME_LGI_ADAM_INTERACTIONS		2.617			3.217			WP_NEPHROGENESIS	1.351	1.666	1.593		2.042
								REACTOME_REGULATION_OF_TP53_ACTIVITY_THROUGH_ASSOCIATION_WITH_CO_FACTORS	1.394	2.617			3.217			WP_MET_IN_TYPE_1_PAPILLARY_RENAL_CELL_CARCINOMA		1.649	1.552		6.734
								REACTOME_ACETYLCHOLINE_BINDING_AND_DOWNSTREAM_EVENTS		2.617			2.504			WP_INTRACELLULAR_TRAFFICKING_PROTEINS_INVOLVED_IN_CMT_NEUROPATHY		1.609			2.112
								REACTOME_SEMA3A_PLEXIN_REPULSION_SIGNALING_BY_INHIBITING_INTEGRIN_ADHESION	2.158	2.617			4.101			WP_MAMMARY_GLAND_DEVELOPMENT_PATHWAY_EMBRYONIC_DEVELOPMENT_STAGE_1_OF_4	1.318	1.586	1.516		2.444
								REACTOME_BETA_CATENIN_INDEPENDENT_WNT_SIGNALING	2.608	2.614	2.057		9.862			WP_MFAP5_EFFECT_ON_PERMEABILITY_AND_MOTILITY_OF_ENDOTHELIAL_CELLS_VIA_CYTOSKELETON_REARRANGEMENT		1.586			2.444
								REACTOME_CTLA4_INHIBITORY_SIGNALING		2.604	2.44		4.333			WP_TRANSCRIPTION_COFACTORS_SKI_AND_SKIL_PROTEIN_PARTNERS		1.586			3.85
								REACTOME_ER_QUALITY_CONTROL_COMPARTMENT_ERQC		2.604						WP_REGULATION_OF_WNTBCATENIN_SIGNALING_BY_SMALL_MOLECULE_COMPOUNDS		1.586			1.379
								REACTOME_METABOLISM_OF_WATER_SOLUBLE_VITAMINS_AND_COFACTORS		2.573	3.582	1.601	6.303			WP_AMYOTROPHIC_LATERAL_SCLEROSIS_ALS		1.581	1.982		6.031
								REACTOME_CYCLIN_D_ASSOCIATED_EVENTS_IN_G1		2.568			1.917			WP_LEPTIN_AND_ADIPONECTIN		1.573
								REACTOME_COPI_DEPENDENT_GOLGI_TO_ER_RETROGRADE_TRAFFIC	1.484	2.56		2.356	2.595			WP_LIVER_X_RECEPTOR_PATHWAY		1.573	1.506
								REACTOME_SMOOTH_MUSCLE_CONTRACTION		2.554	2.392		2.873			WP_VIRAL_ACUTE_MYOCARDITIS	2.118	1.545	3.023		7.55
								REACTOME_CONSTITUTIVE_SIGNALING_BY_ABERRANT_PI3K_IN_CANCER		2.55	5.029	3.377	12.39			WP_GPCRS_CLASS_A_RHODOPSINLIKE		1.545	1.412		5.646
								REACTOME_ACTIVATION_OF_KAINATE_RECEPTORS_UPON_GLUTAMATE_BINDING	1.59	2.51			2.528			WP_NUCLEAR_RECEPTORS		1.537	4.361		8.826
								REACTOME_MET_ACTIVATES_PTK2_SIGNALING	1.59	2.51		1.365	10.3			WP_OVERVIEW_OF_NANOPARTICLE_EFFECTS	1.31	1.519			4.341
								REACTOME_INTERLEUKIN_3_INTERLEUKIN_5_AND_GM_CSF_SIGNALING		2.51	1.435	1.477	4.425			WP_SMALL_LIGAND_GPCRS		1.519
								REACTOME_CD28_DEPENDENT_PI3K_AKT_SIGNALING	1.83	2.51	2.347		1.71			WP_APOPTOSIS_MODULATION_BY_HSP70		1.519
								REACTOME_HS_GAG_DEGRADATION		2.51			1.71			WP_CANNABINOID_RECEPTOR_SIGNALING		1.508	1.957
								REACTOME_REGULATION_OF_SIGNALING_BY_CBL		2.51	1.729		3.349			WP_LIPID_METABOLISM_PATHWAY		1.508	1.425
								REACTOME_G_ALPHA_Z_SIGNALLING_EVENTS		2.51	4.149	2.01	3.913			WP_GENES_RELATED_TO_PRIMARY_CILIUM_DEVELOPMENT_BASED_ON_CRISPR		1.474			2.003
								REACTOME_LAMININ_INTERACTIONS	2.196	2.51		1.972	6.473			WP_SEROTONIN_TRANSPORTER_ACTIVITY		1.473	2.175	1.389	1.339
								REACTOME_PHASE_2_PLATEAU_PHASE		2.493	2.341		3.739			WP_INTERLEUKIN1_INDUCED_ACTIVATION_OF_NFKAPPAB		1.473
								REACTOME_INTERLEUKIN_23_SIGNALING		2.483			1.634			WP_EBOLA_VIRUS_PATHWAY_ON_HOST		1.465	5.844	3.874	15.316
								REACTOME_INLA_MEDIATED_ENTRY_OF_LISTERIA_MONOCYTOGENES_INTO_HOST_CELLS		2.483						WP_PI3KAKTMTOR_SIGNALING_PATHWAY_AND_THERAPEUTIC_OPPORTUNITIES	2.306	1.457			2.676
								REACTOME_RHOQ_GTPASE_CYCLE	1.574	2.458			5.921			WP_METABOLISM_OF_SPINGOLIPIDS_IN_ER_AND_GOLGI_APPARATUS		1.457			2.106
								REACTOME_CRISTAE_FORMATION		2.429						WP_NONALCOHOLIC_FATTY_LIVER_DISEASE		1.457			5.891
								REACTOME_INTERLEUKIN_1_FAMILY_SIGNALING		2.428	1.361		7.813			WP_TNF_RELATED_WEAK_INDUCER_OF_APOPTOSIS_TWEAK_SIGNALING_PATHWAY		1.415			3.478
								REACTOME_PARASITE_INFECTION		2.414						WP_MELATONIN_METABOLISM_AND_EFFECTS		1.415			1.754
								REACTOME_LONG_TERM_POTENTIATION		2.413		3.012	7.218			WP_COMMON_PATHWAYS_UNDERLYING_DRUG_ADDICTION		1.415	4.081	2.208	3.478
								REACTOME_METABOLISM_OF_AMINO_ACIDS_AND_DERIVATIVES		2.4	1.39		16.765			WP_CELL_MIGRATION_AND_INVASION_THROUGH_P75NTR	2.98	1.411			7.205
								REACTOME_SELECTIVE_AUTOPHAGY		2.385						WP_ETHANOL_EFFECTS_ON_HISTONE_MODIFICATIONS		1.411			1.662
								REACTOME_CGMP_EFFECTS		2.371			4.269			WP_NICOTINE_ACTIVITY_ON_DOPAMINERGIC_NEURONS		1.399	2.592		2.487
								REACTOME_REGULATION_OF_KIT_SIGNALING	1.306	2.371	2.217	1.891	4.269			WP_PATHOGENESIS_OF_SARSCOV2_MEDIATED_BY_NSP9NSP10_COMPLEX		1.399	2.592	1.66	2.487
								REACTOME_ELEVATION_OF_CYTOSOLIC_CA2_LEVELS		2.371			3.418			WP_GLOBO_SPHINGOLIPID_METABOLISM		1.399	2.592		4.551
								REACTOME_PHASE_0_RAPID_DEPOLARISATION		2.358	2.194	3.277	7.521			WP_GALANIN_RECEPTOR_PATHWAY		1.399			1.478
								REACTOME_EPH_EPHRIN_MEDIATED_REPULSION_OF_CELLS		2.348		1.417	8.327			WP_TFS_REGULATE_MIRNAS_RELATED_TO_CARDIAC_HYPERTROPHY		1.39			1.752
								REACTOME_ORGANIC_ANION_TRANSPORTERS		2.303			2.073			WP_GENES_CONTROLLING_NEPHROGENESIS	1.902	1.383	1.74	2.875	7.636
								REACTOME_RHOF_GTPASE_CYCLE		2.299			4.333			WP_TNF_ALPHA_SIGNALING_PATHWAY	1.578	1.377	1.94		4.728
								REACTOME_SIGNALING_BY_TGF_BETA_RECEPTOR_COMPLEX	1.832	2.298	2.126		4.35			WP_TRANSCRIPTION_FACTOR_REGULATION_IN_ADIPOGENESIS		1.338	3.236		2.902
								REACTOME_GLUCAGON_SIGNALING_IN_METABOLIC_REGULATION		2.283	3.388	2.474	2.144			WP_PKCGAMMA_CALCIUM_SIGNALING_PATHWAY_IN_ATAXIA		1.338			3.553
								REACTOME_REELIN_SIGNALLING_PATHWAY		2.266						WP_TYPE_I_COLLAGEN_SYNTHESIS_IN_THE_CONTEXT_OF_OSTEOGENESIS_IMPERFECTA		1.32			3.852
								REACTOME_HDL_CLEARANCE		2.266						WP_SIGNALING_PATHWAYS_IN_GLIOBLASTOMA	1.312	1.312	4.744	4.096	11.331
								REACTOME_COSTIMULATION_BY_THE_CD28_FAMILY		2.255	4.103	1.942	6.193			WP_NO_METABOLISM_IN_CYSTIC_FIBROSIS	1.486	1.311		1.305
								REACTOME_COPI_INDEPENDENT_GOLGI_TO_ER_RETROGRADE_TRAFFIC		2.238						WP_NEUROINFLAMMATION	1.486	1.311
								REACTOME_SIGNALING_BY_ERYTHROPOIETIN		2.235		1.518	1.795			WP_GLYCOLYSIS_AND_GLUCONEOGENESIS		1.311	2.655		1.848
								REACTOME_REGULATION_OF_TP53_ACTIVITY		2.221	3.063		7.207			WP_DEVELOPMENT_OF_PULMONARY_DENDRITIC_CELLS_AND_MACROPHAGE_SUBSETS		1.311	1.94		5.866
								REACTOME_EXTRA_NUCLEAR_ESTROGEN_SIGNALING	1.321	2.213	2.969	2.387	4.127			WP_AUTOSOMAL_RECESSIVE_OSTEOPETROSIS_PATHWAYS		1.311
								REACTOME_INTRA_GOLGI_TRAFFIC		2.186			1.508			WP_FACTORS_AND_PATHWAYS_AFFECTING_INSULINLIKE_GROWTH_FACTOR_IGF1AKT_SIGNALING	2.746		1.541		5.576
								REACTOME_TRANSCRIPTIONAL_ACTIVITY_OF_SMAD2_SMAD3_SMAD4_HETEROTRIMER		2.186			2.581			WP_GENES_INVOLVED_IN_MALE_INFERTILITY	2.587		2.296	2.828	5.268
								REACTOME_TRANSLATION_OF_SARS_COV_2_STRUCTURAL_PROTEINS		2.186	1.6					WP_INTERLEUKIN11_SIGNALING_PATHWAY	2.556			2.134	5.385
								REACTOME_ASSEMBLY_AND_CELL_SURFACE_PRESENTATION_OF_NMDA_RECEPTORS		2.186		2.666	3.012			WP_TRANSLATION_INHIBITORS_IN_CHRONICALLY_ACTIVATED_PDGFRA_CELLS	2.431		3.029		4.121
								REACTOME_SIGNALING_BY_FGFR		2.186		1.71	4.435			WP_ALPHA_6_BETA_4_SIGNALING_PATHWAY	2.118			1.828	6.059
								REACTOME_S_PHASE		2.172			3.273			WP_15Q133_COPY_NUMBER_VARIATION_SYNDROME	1.902		2.592
								REACTOME_SODIUM_CALCIUM_EXCHANGERS		2.155	1.322					WP_SOMATROPH_AXIS_GH_AND_ITS_RELATIONSHIP_TO_DIETARY_RESTRICTION_AND_AGING	1.902				1.748
								REACTOME_DSCAM_INTERACTIONS	1.54	2.155	2.027		1.85			WP_IL7_SIGNALING_PATHWAY	1.758		1.646		3.559
								REACTOME_CELL_EXTRACELLULAR_MATRIX_INTERACTIONS		2.155	1.417		1.308			WP_CALORIC_RESTRICTION_AND_AGING	1.744
								REACTOME_RORA_ACTIVATES_GENE_EXPRESSION		2.155	2.775		1.772			WP_AUTOPHAGY	1.626				1.371
								REACTOME_CLEC7A_DECTIN_1_SIGNALING		2.152			3.542			WP_ONE_CARBON_METABOLISM	1.592
								REACTOME_ION_TRANSPORT_BY_P_TYPE_ATPASES		2.146			10.282			WP_BDNFTRKB_SIGNALING	1.54			1.904	2.753
								REACTOME_FOXO_MEDIATED_TRANSCRIPTION	1.938	2.133	1.979		5.299			WP_FLUOROPYRIMIDINE_ACTIVITY	1.521				1.379
								REACTOME_MHC_CLASS_II_ANTIGEN_PRESENTATION	1.982	2.104	1.937	3.269	4.757			WP_RALA_DOWNSTREAM_REGULATED_GENES	1.51
								REACTOME_RHO_GTPASES_ACTIVATE_WASPS_AND_WAVES		2.088			2.225			WP_TARGET_OF_RAPAMYCIN_TOR_SIGNALING	1.486				2.254
								REACTOME_SARS_COV_2_INFECTION		2.088			1.964			WP_DISORDERS_OF_FOLATE_METABOLISM_AND_TRANSPORT	1.486
								REACTOME_EFFECTS_OF_PIP2_HYDROLYSIS		2.082	1.952		5.743			WP_IL2_SIGNALING_PATHWAY	1.374		1.781	1.636	7.186
								REACTOME_INITIATION_OF_NUCLEAR_ENVELOPE_NE_REFORMATION		2.054						WP_FIBRIN_COMPLEMENT_RECEPTOR_3_SIGNALING_PATHWAY	1.374		1.781		4.009
								REACTOME_INTERLEUKIN_12_FAMILY_SIGNALING		2.046			2.81			WP_JOUBERT_SYNDROME	1.363				2.279
								REACTOME_TRANSPORT_OF_ORGANIC_ANIONS		2.018						WP_MIRNA_TARGETS_IN_ECM_AND_MEMBRANE_RECEPTORS	1.363				1.677
								REACTOME_TP53_REGULATES_TRANSCRIPTION_OF_CASPASE_ACTIVATORS_AND_CASPASES		2.018			1.657			WP_PYRIMIDINE_METABOLISM_AND_RELATED_DISEASES	1.351				1.507
								REACTOME_FORMATION_OF_THE_BETA_CATENIN_TCF_TRANSACTIVATING_COMPLEX		2.011						WP_ATM_SIGNALING_NETWORK_IN_DEVELOPMENT_AND_DISEASE	1.318
								REACTOME_NOTCH_HLH_TRANSCRIPTION_PATHWAY		2.009	3.184		4.68			WP_4HYDROXYTAMOXIFEN_DEXAMETHASONE_AND_RETINOIC_ACIDS_REGULATION_OF_P27_EXPRESSION	1.318				1.872
								REACTOME_PLATELET_CALCIUM_HOMEOSTASIS		2.009	1.389		4.68			WP_ENDOPLASMIC_RETICULUM_STRESS_RESPONSE_IN_CORONAVIRUS_INFECTION	1.313				4.273
								REACTOME_SIGNALING_BY_BMP		2.009	1.901		4.026			WP_HOSTPATHOGEN_INTERACTION_OF_HUMAN_CORONA_VIRUSES_AUTOPHAGY	1.31
								REACTOME_TRANSLATION		2.006			2.96			WP_AFLATOXIN_B1_METABOLISM				1.658
								REACTOME_SIGNALING_BY_NOTCH1_PEST_DOMAIN_MUTANTS_IN_CANCER		2.005	2.84		3.514			WP_VALPROIC_ACID_PATHWAY					2.197
								REACTOME_POTENTIAL_THERAPEUTICS_FOR_SARS		1.987	1.514		3.871			WP_G1_TO_S_CELL_CYCLE_CONTROL					2.666
								REACTOME_PI3K_AKT_SIGNALING_IN_CANCER	1.837	1.987	5.627	2.666	13.702			WP_PDGFRBETA_PATHWAY				2.038	3.401
								REACTOME_LISTERIA_MONOCYTOGENES_ENTRY_INTO_HOST_CELLS		1.971			3.136			WP_16P112_DISTAL_DELETION_SYNDROME				1.475
								REACTOME_SIGNALLING_TO_RAS		1.971		1.71				WP_MAP3K1_ROLE_IN_PROMOTING_AND_BLOCKING_GONADAL_DETERMINATION				1.864	1.507
								REACTOME_APOPTOTIC_CLEAVAGE_OF_CELLULAR_PROTEINS		1.971	2.392		2.017			WP_SULINDAC_METABOLIC_PATHWAY			2.285
								REACTOME_FLT3_SIGNALING		1.971	1.857		5.095			WP_MAPK_CASCADE					1.85
								REACTOME_RAC3_GTPASE_CYCLE	2.428	1.95	1.813		10.757			WP_TLR4_SIGNALING_AND_TOLERANCE					2.2
								REACTOME_EGR2_AND_SOX10_MEDIATED_INITIATION_OF_SCHWANN_CELL_MYELINATION		1.945			3.8			WP_BLADDER_CANCER			1.373	1.653	3.62
								REACTOME_MYOGENESIS		1.945	2.422	1.387	5.149			WP_ARYL_HYDROCARBON_RECEPTOR_PATHWAY					1.943
								REACTOME_DAP12_SIGNALING		1.945		1.387	1.39			WP_FATTY_ACID_BIOSYNTHESIS					1.367
								REACTOME_TP53_REGULATES_TRANSCRIPTION_OF_CELL_CYCLE_GENES		1.93			1.451			WP_PEPTIDE_GPCRS					3.503
								REACTOME_TRANSPORT_TO_THE_GOLGI_AND_SUBSEQUENT_MODIFICATION		1.927	2.34		6.923			WP_TOLLLIKE_RECEPTOR_SIGNALING_PATHWAY					4.487
								REACTOME_TRANSCRIPTIONAL_REGULATION_BY_RUNX2		1.921			8.581			WP_MAMMARY_GLAND_DEVELOPMENT_PATHWAY_INVOLUTION_STAGE_4_OF_4					3.019
								REACTOME_FCGR3A_MEDIATED_IL10_SYNTHESIS		1.921						WP_COMPLEMENT_AND_COAGULATION_CASCADES					2.053
								REACTOME_FGFRL1_MODULATION_OF_FGFR1_SIGNALING		1.91						WP_ALANINE_AND_ASPARTATE_METABOLISM					2.42
								REACTOME_NF_KB_IS_ACTIVATED_AND_SIGNALS_SURVIVAL		1.91						WP_3Q29_COPY_NUMBER_VARIATION_SYNDROME			3.41		3.892
								REACTOME_SUMOYLATION		1.909	3.313		9.693			WP_PI3KAKTMTOR_VITD3_SIGNALLING					1.367
								REACTOME_CELLULAR_RESPONSES_TO_EXTERNAL_STIMULI	1.817	1.909	2.867		16.572			WP_OVERVIEW_OF_LEUKOCYTEINTRINSIC_HIPPO_PATHWAY_FUNCTIONS					4.487
								REACTOME_TRANSLOCATION_OF_SLC2A4_GLUT4_TO_THE_PLASMA_MEMBRANE	1.844	1.898			4.932			WP_MIRNA_REGULATION_OF_PROSTATE_CANCER_SIGNALING_PATHWAYS					2.398
								REACTOME_REGULATION_OF_FZD_BY_UBIQUITINATION		1.893			4.333			WP_IRON_METABOLISM_IN_PLACENTA			1.318		2.42
								REACTOME_SYNAPTIC_ADHESION_LIKE_MOLECULES		1.893		2.373	4.333			WP_CONTROL_OF_IMMUNE_TOLERANCE_BY_VASOACTIVE_INTESTINAL_PEPTIDE					2.197
								REACTOME_TRANSCRIPTIONAL_REGULATION_OF_WHITE_ADIPOCYTE_DIFFERENTIATION		1.892	1.43		3.188			WP_16P112_PROXIMAL_DELETION_SYNDROME			1.762
								REACTOME_FOXO_MEDIATED_TRANSCRIPTION_OF_OXIDATIVE_STRESS_METABOLIC_AND_NEURONAL_GENES	1.59	1.888	1.78		4.903			WP_MTHFR_DEFICIENCY					2.612
								REACTOME_SIGNALING_BY_CSF3_G_CSF		1.888		1.365	3.034			WP_VITAMIN_A_AND_CAROTENOID_METABOLISM			2.722		4.22
								REACTOME_EPIGENETIC_REGULATION_OF_GENE_EXPRESSION		1.876						WP_IL1_SIGNALING_PATHWAY					4.827
								REACTOME_CYCLIN_A_CDK2_ASSOCIATED_EVENTS_AT_S_PHASE_ENTRY		1.857			2.783			WP_PHOTODYNAMIC_THERAPYINDUCED_NFKB_SURVIVAL_SIGNALING			1.635		2.051
								REACTOME_NECTIN_NECL_TRANS_HETERODIMERIZATION		1.848						WP_OLIGODENDROCYTE_SPECIFICATION_AND_DIFFERENTIATION_LEADING_TO_MYELIN_COMPONENTS_FOR_CNS				1.347	1.662
								REACTOME_RHOD_GTPASE_CYCLE		1.845			4.474			WP_TP53_NETWORK					2.106
								REACTOME_GAP_JUNCTION_TRAFFICKING_AND_REGULATION		1.845		1.417				WP_MED_AND_PSEUDOACHONDROPLASIA_GENES				1.747
								REACTOME_PROTEIN_FOLDING		1.834		2.387				WP_SPHINGOLIPID_METABOLISM_INTEGRATED_PATHWAY					2.934
								REACTOME_FATTY_ACID_METABOLISM		1.832		1.681	10.478			WP_NAD_METABOLISM_SIRTUINS_AND_AGING					1.339
								REACTOME_RHOG_GTPASE_CYCLE	2.268	1.829	3.023		8.533			WP_METAPATHWAY_BIOTRANSFORMATION_PHASE_I_AND_II			2.501		4.827
								REACTOME_HEDGEHOG_ON_STATE		1.828			3.027			WP_DRUG_INDUCTION_OF_BILE_ACID_PATHWAY					2.651
								REACTOME_DOWNSTREAM_SIGNALING_OF_ACTIVATED_FGFR1		1.827		1.947	2.391			WP_PURINERGIC_SIGNALING			1.685		1.752
								REACTOME_MTOR_SIGNALLING	1.909	1.823			2.099			WP_METABOLIC_REPROGRAMMING_IN_COLON_CANCER			1.702		1.592
								REACTOME_TCR_SIGNALING		1.823	1.411		3.571			WP_IL10_ANTIINFLAMMATORY_SIGNALING_PATHWAY				1.344
								REACTOME_DCC_MEDIATED_ATTRACTIVE_SIGNALING	2.158	1.812	2.454		6.266			WP_TCA_CYCLE_AKA_KREBS_OR_CITRIC_ACID_CYCLE					1.379
								REACTOME_CARNITINE_METABOLISM		1.812			1.347			WP_LDLRAD4_AND_WHAT_WE_KNOW_ABOUT_IT					2.843
								REACTOME_APOPTOTIC_EXECUTION_PHASE		1.806	2.127		1.847			WP_VITAMIN_B12_METABOLISM					3.441
								REACTOME_NUCLEAR_SIGNALING_BY_ERBB4		1.767			5.87			WP_FAS_LIGAND_FASL_PATHWAY_AND_STRESS_INDUCTION_OF_HEAT_SHOCK_PROTEINS_HSP_REGULATION			2.178		3.689
								REACTOME_THROMBIN_SIGNALLING_THROUGH_PROTEINASE_ACTIVATED_RECEPTORS_PARS		1.767			1.85			WP_IL5_SIGNALING_PATHWAY					6.247
								REACTOME_CELL_SURFACE_INTERACTIONS_AT_THE_VASCULAR_WALL		1.767			2.124			WP_GLYCOGEN_SYNTHESIS_AND_DEGRADATION					2.769
								REACTOME_NUCLEAR_RECEPTOR_TRANSCRIPTION_PATHWAY		1.761	3.733		10.072			WP_HEART_DEVELOPMENT			2.074		2.933
								REACTOME_NUCLEAR_ENVELOPE_NE_REASSEMBLY		1.761						WP_ARYL_HYDROCARBON_RECEPTOR_NETPATH			1.982	1.507	4.121
								REACTOME_C_TYPE_LECTIN_RECEPTORS_CLRS		1.75	1.639		6.092			WP_PROTEASOME_DEGRADATION					2.317
								REACTOME_SIGNALING_BY_NUCLEAR_RECEPTORS		1.745	4.378		5.674			WP_ETHANOL_METABOLISM_RESULTING_IN_PRODUCTION_OF_ROS_BY_CYP2E1			2.31
								REACTOME_RND2_GTPASE_CYCLE		1.721			2.699			WP_FGF23_SIGNALLING_IN_HYPOPHOSPHATEMIC_RICKETS_AND_RELATED_DISORDERS					1.811
								REACTOME_INSULIN_RECEPTOR_SIGNALLING_CASCADE		1.717	4.325	1.871	4.527			WP_CYTOSOLIC_DNASENSING_PATHWAY					1.62
								REACTOME_SIGNALING_BY_PTK6	1.638	1.717	4.325	2.387	8.296			WP_CANCER_IMMUNOTHERAPY_BY_CTLA4_BLOCKADE					4.306
								REACTOME_DEPOLYMERISATION_OF_THE_NUCLEAR_LAMINA		1.716						WP_PREGNANE_X_RECEPTOR_PATHWAY					3.852
								REACTOME_ANCHORING_FIBRIL_FORMATION	1.346	1.716			2.279			WP_GASTRIC_CANCER_NETWORK_2					2.281
								REACTOME_GRB2_SOS_PROVIDES_LINKAGE_TO_MAPK_SIGNALING_FOR_INTEGRINS		1.716			2.279			WP_EXTRACELLULAR_VESICLES_IN_THE_CROSSTALK_OF_CARDIAC_CELLS					2.989
								REACTOME_P130CAS_LINKAGE_TO_MAPK_SIGNALING_FOR_INTEGRINS		1.716	1.64		2.949			WP_EXERCISEINDUCED_CIRCADIAN_REGULATION					3.484
								REACTOME_GLUCAGON_TYPE_LIGAND_RECEPTORS		1.716		3.226	2.596			WP_ERK_PATHWAY_IN_HUNTINGTONS_DISEASE				1.967	1.809
								REACTOME_PLASMA_LIPOPROTEIN_CLEARANCE		1.716	2.129					WP_REGULATION_OF_APOPTOSIS_BY_PARATHYROID_HORMONERELATED_PROTEIN					2.325
								REACTOME_PEPTIDE_HORMONE_METABOLISM		1.708	2.326		4.512			WP_22Q112_COPY_NUMBER_VARIATION_SYNDROME			1.489		4.18
								REACTOME_REGULATION_OF_CYTOSKELETAL_REMODELING_AND_CELL_SPREADING_BY_IPP_COMPLEX_COMPONENTS		1.706	2.525					WP_P38_MAPK_SIGNALING_PATHWAY					2.615
								REACTOME_DEFECTS_IN_BIOTIN_BTN_METABOLISM		1.706						WP_SIGNAL_TRANSDUCTION_THROUGH_IL1R					2.051
								REACTOME_NETRIN_MEDIATED_REPULSION_SIGNALS		1.706			3.743			WP_EDA_SIGNALLING_IN_HAIR_FOLLICLE_DEVELOPMENT				2.089
								REACTOME_NEF_AND_SIGNAL_TRANSDUCTION		1.706	2.525	1.593	2.691			WP_SELENIUM_MICRONUTRIENT_NETWORK					1.677
								REACTOME_AMPK_INHIBITS_CHREBP_TRANSCRIPTIONAL_ACTIVATION_ACTIVITY		1.706						WP_IL9_SIGNALING_PATHWAY					1.736
								REACTOME_ABC_FAMILY_PROTEINS_MEDIATED_TRANSPORT		1.702	1.904		4.736			WP_HEDGEHOG_SIGNALING_PATHWAY_NETPATH				2.819
								REACTOME_INTERLEUKIN_2_FAMILY_SIGNALING		1.69			4.532			WP_FERROPTOSIS			2.983		3.258
								REACTOME_THROMBOXANE_SIGNALLING_THROUGH_TP_RECEPTOR		1.69			1.491			WP_THE_ALTERNATIVE_PATHWAY_OF_FETAL_ANDROGEN_SYNTHESIS				1.344
								REACTOME_RHOJ_GTPASE_CYCLE		1.69			6.7			WP_MIRNA_REGULATION_OF_DNA_DAMAGE_RESPONSE					2.349
								REACTOME_AGGREPHAGY		1.69						WP_PYRIMIDINE_METABOLISM					1.704
								REACTOME_PROCESSING_OF_CAPPED_INTRON_CONTAINING_PRE_MRNA		1.69			2.655			WP_CYTOKINES_AND_INFLAMMATORY_RESPONSE					2.252
								REACTOME_FC_EPSILON_RECEPTOR_FCERI_SIGNALING		1.659			2.269			WP_TYPE_II_INTERFERON_SIGNALING_IFNG					2.254
								REACTOME_REGULATED_NECROSIS		1.646			2.527			WP_PHOTODYNAMIC_THERAPYINDUCED_UNFOLDED_PROTEIN_RESPONSE					2.828
								REACTOME_DAP12_INTERACTIONS		1.64			1.434			WP_NUCLEAR_RECEPTORS_IN_LIPID_METABOLISM_AND_TOXICITY			1.635		4.071
								REACTOME_P75NTR_SIGNALS_VIA_NF_KB		1.632						WP_THE_HUMAN_IMMUNE_RESPONSE_TO_TUBERCULOSIS				1.608
								REACTOME_SEMA3A_PAK_DEPENDENT_AXON_REPULSION	1.306	1.632	1.564		3.418			WP_HYPOTHETICAL_CRANIOFACIAL_DEVELOPMENT_PATHWAY			1.74	1.608
								REACTOME_CILIUM_ASSEMBLY	1.638	1.625	2.557		3.242			WP_DNA_REPAIR_PATHWAYS_FULL_NETWORK					2.496
								REACTOME_NOTCH3_INTRACELLULAR_DOMAIN_REGULATES_TRANSCRIPTION		1.623	2.091		1.795			WP_THIAMINE_METABOLIC_PATHWAYS					1.726
								REACTOME_INACTIVATION_OF_CSF3_G_CSF_SIGNALING		1.623			2.779			WP_TCA_CYCLE_NUTRIENT_UTILIZATION_AND_INVASIVENESS_OF_OVARIAN_CANCER				1.893	2.109
								REACTOME_ADP_SIGNALLING_THROUGH_P2Y_PURINOCEPTOR_1		1.623			1.795			WP_ROBO4_AND_VEGF_SIGNALING_PATHWAYS_CROSSTALK					1.748
								REACTOME_MRNA_SPLICING		1.623			1.815			WP_GENE_REGULATORY_NETWORK_MODELLING_SOMITOGENESIS			1.409
								REACTOME_INWARDLY_RECTIFYING_K_CHANNELS		1.617			5.095			WP_NOVEL_INTRACELLULAR_COMPONENTS_OF_RIGILIKE_RECEPTOR_RLR_PATHWAY					2.577
								REACTOME_RHOBTB_GTPASE_CYCLE		1.617			1.93			WP_H19_ACTION_RBE2F1_SIGNALING_AND_CDKBETACATENIN_ACTIVITY					2.223
								REACTOME_SIGNALING_BY_NOTCH		1.607	3.333		4.455			WP_SEROTONIN_AND_ANXIETY			1.593		2.651
								REACTOME_CARBOXYTERMINAL_POST_TRANSLATIONAL_MODIFICATIONS_OF_TUBULIN		1.601						WP_SARSCOV2_AND_COVID19_PATHWAY					1.508
								REACTOME_PROSTANOID_LIGAND_RECEPTORS		1.579						WP_PHOTODYNAMIC_THERAPYINDUCED_AP1_SURVIVAL_SIGNALING			2.858		3.23
								REACTOME_NR1H2_NR1H3_REGULATE_GENE_EXPRESSION_LINKED_TO_LIPOGENESIS		1.579						WP_TRYPTOPHAN_CATABOLISM_LEADING_TO_NAD_PRODUCTION			1.662
								REACTOME_CA2_ACTIVATED_K_CHANNELS		1.579	1.514		4.359			WP_MAMMARY_GLAND_DEVELOPMENT_PATHWAY_PUBERTY_STAGE_2_OF_4					2.197
								REACTOME_CD163_MEDIATING_AN_ANTI_INFLAMMATORY_RESPONSE		1.579						WP_ZINC_HOMEOSTASIS					2.254
								REACTOME_OAS_ANTIVIRAL_RESPONSE		1.579						WP_DIFFERENTIATION_PATHWAY			1.982	1.507	4.658
								REACTOME_DOWNREGULATION_OF_ERBB4_SIGNALING		1.579						WP_HUMAN_COMPLEMENT_SYSTEM				1.541	2.247
								REACTOME_SIGNALING_BY_ERBB2_IN_CANCER		1.564		2.798	2.116			WP_METABOLISM_OF_ALPHALINOLENIC_ACID			1.888		1.478
								REACTOME_INTERLEUKIN_12_SIGNALING		1.564			2.269			WP_RETINOBLASTOMA_GENE_IN_CANCER					3.396
								REACTOME_MITOTIC_G1_PHASE_AND_G1_S_TRANSITION		1.564			3.88			WP_PROXIMAL_TUBULE_TRANSPORT			2.472		10.396
								REACTOME_METAL_ION_SLC_TRANSPORTERS		1.564	1.491		1.678			WP_INTEGRATED_CANCER_PATHWAY					5.191
								REACTOME_NR1H2_AND_NR1H3_MEDIATED_SIGNALING		1.564	1.479		1.917			WP_DOPAMINERGIC_NEUROGENESIS			1.379	3.628	2.2
								REACTOME_RNA_POLYMERASE_I_TRANSCRIPTION_INITIATION		1.564						WP_METHIONINE_DE_NOVO_AND_SALVAGE_PATHWAY					2.902
								REACTOME_FOXO_MEDIATED_TRANSCRIPTION_OF_CELL_CYCLE_GENES		1.561						WP_EICOSANOID_METABOLISM_VIA_CYTOCHROME_P450_MONOOXYGENASES_CYP_PATHWAY					1.726
								REACTOME_REGULATION_OF_RUNX1_EXPRESSION_AND_ACTIVITY		1.561			3.151			WP_SEROTONIN_RECEPTOR_2_AND_ELKSRFGATA4_SIGNALING					2.672
								REACTOME_INTERLEUKIN_RECEPTOR_SHC_SIGNALING		1.502		1.439	1.584			WP_EV_RELEASE_FROM_CARDIAC_CELLS_AND_THEIR_FUNCTIONAL_EFFECTS					2.482
								REACTOME_VEGFR2_MEDIATED_VASCULAR_PERMEABILITY	1.656	1.502	1.434		1.584			WP_P53_TRANSCRIPTIONAL_GENE_NETWORK			1.897		4.255
								REACTOME_SIGNALING_BY_THE_B_CELL_RECEPTOR_BCR		1.499			1.934			WP_BENZENE_METABOLISM					1.748
								REACTOME_ABC_TRANSPORTERS_IN_LIPID_HOMEOSTASIS		1.476						WP_TYPE_2_PAPILLARY_RENAL_CELL_CARCINOMA			1.593		5.807
								REACTOME_SIGNALING_BY_NOTCH3		1.476	1.813		2.858			WP_MONOAMINE_GPCRS				2.631	3.852
								REACTOME_TP53_REGULATES_TRANSCRIPTION_OF_GENES_INVOLVED_IN_G2_CELL_CYCLE_ARREST		1.476			1.772			WP_PHOSPHOINOSITIDES_METABOLISM			2.978		3.484
								REACTOME_SIGNALING_BY_FGFR2		1.474		1.947	2.775			WP_PHOTODYNAMIC_THERAPYINDUCED_NFE2L2_NRF2_SURVIVAL_SIGNALING			1.766
								REACTOME_ACTIVATION_OF_THE_AP_1_FAMILY_OF_TRANSCRIPTION_FACTORS		1.467						WP_EPO_RECEPTOR_SIGNALING					4.71
								REACTOME_REGULATION_OF_PTEN_GENE_TRANSCRIPTION		1.467			1.795			WP_STATIN_PATHWAY					1.85
								REACTOME_SIGNAL_ATTENUATION		1.467	2.166		2.073			WP_DNA_IRDAMAGE_AND_CELLULAR_RESPONSE_VIA_ATR					2.002
								REACTOME_NEGATIVE_REGULATION_OF_ACTIVITY_OF_TFAP2_AP_2_FAMILY_TRANSCRIPTION_FACTORS		1.467	1.411	1.436				WP_ONE_CARBON_METABOLISM_AND_RELATED_PATHWAYS			1.74		1.792
								REACTOME_CASPASE_ACTIVATION_VIA_DEPENDENCE_RECEPTORS_IN_THE_ABSENCE_OF_LIGAND		1.467			1.434			WP_SIMPLIFIED_INTERACTION_MAP_BETWEEN_LOXL4_AND_OXIDATIVE_STRESS_PATHWAY					1.478
								REACTOME_PI3K_EVENTS_IN_ERBB4_SIGNALING		1.467			2.073			WP_MAMMARY_GLAND_DEVELOPMENT_PATHWAY_PREGNANCY_AND_LACTATION_STAGE_3_OF_4			2.277	1.904	2.281
								REACTOME_TRANSPORT_OF_BILE_SALTS_AND_ORGANIC_ACIDS_METAL_IONS_AND_AMINE_COMPOUNDS		1.467	2.922		11.872			WP_FGFR3_SIGNALLING_IN_CHONDROCYTE_PROLIFERATION_AND_TERMINAL_DIFFERENTIATION			2.089	1.475	2.112
								REACTOME_UREA_CYCLE		1.467						WP_MIRNA_REGULATION_OF_P53_PATHWAY_IN_PROSTATE_CANCER					1.379
								REACTOME_RHO_GTPASES_ACTIVATE_FORMINS		1.462			3.041			WP_DISORDERS_OF_THE_KREBS_CYCLE					1.478
								REACTOME_ADRENALINE_NORADRENALINE_INHIBITS_INSULIN_SECRETION		1.455	3.184	1.417	2.314			WP_CONSTITUTIVE_ANDROSTANE_RECEPTOR_PATHWAY					2.403
								REACTOME_TRANSLATION_OF_SARS_COV_1_STRUCTURAL_PROTEINS		1.455	1.389		1.873			WP_PHOTODYNAMIC_THERAPYINDUCED_HIF1_SURVIVAL_SIGNALING			2.029		1.478
								REACTOME_SYNTHESIS_OF_PC		1.455			2.83			WP_CHOLESTEROL_METABOLISM_INCLUDES_BOTH_BLOCH_AND_KANDUTSCHRUSSELL_PATHWAYS					1.689
								REACTOME_BUDDING_AND_MATURATION_OF_HIV_VIRION		1.455						WP_SPHINGOLIPID_METABOLISM_GENERAL_OVERVIEW					3.135
								REACTOME_IRE1ALPHA_ACTIVATES_CHAPERONES		1.448						WP_GANGLIO_SPHINGOLIPID_METABOLISM					3.762
								REACTOME_HDMS_DEMETHYLATE_HISTONES		1.448						WP_COVID19_ADVERSE_OUTCOME_PATHWAY					1.809
								REACTOME_SARS_COV_1_INFECTION		1.448			2.747			WP_OSTEOBLAST_SIGNALING					1.988
								REACTOME_ER_TO_GOLGI_ANTEROGRADE_TRANSPORT		1.447	1.861		5.012			WP_CYTOPLASMIC_RIBOSOMAL_PROTEINS					4.337
								REACTOME_CONSTITUTIVE_SIGNALING_BY_LIGAND_RESPONSIVE_EGFR_CANCER_VARIANTS		1.413		1.751				WP_FOLLICLE_STIMULATING_HORMONE_FSH_SIGNALING_PATHWAY					3.175
								REACTOME_SCAVENGING_BY_CLASS_A_RECEPTORS		1.413		2.446	3.364			WP_KYNURENINE_PATHWAY_AND_LINKS_TO_CELLULAR_SENESCENCE			2.399
								REACTOME_TRANSCRIPTIONAL_REGULATION_BY_MECP2		1.407	4.897	1.681	7.598			WP_BIOGENIC_AMINE_SYNTHESIS					4.487
								REACTOME_DOWNSTREAM_SIGNAL_TRANSDUCTION		1.405			3.192			WP_CELLS_AND_MOLECULES_INVOLVED_IN_LOCAL_ACUTE_INFLAMMATORY_RESPONSE					2.042
								REACTOME_DOWNREGULATION_OF_ERBB2_SIGNALING	1.602	1.405		1.387	2.676			WP_BMP_SIGNALING_PATHWAY_IN_EYELID_DEVELOPMENT			2.692	1.694
								REACTOME_ENERGY_DEPENDENT_REGULATION_OF_MTOR_BY_LKB1_AMPK		1.405	1.338		1.765			WP_COPPER_HOMEOSTASIS			1.74		2.487
								REACTOME_ACTIVATION_OF_AMPK_DOWNSTREAM_OF_NMDARS		1.405						WP_PPAR_SIGNALING_PATHWAY					3.139
								REACTOME_MATURATION_OF_SARS_COV_2_SPIKE_PROTEIN		1.405	1.338					WP_KISSPEPTINKISSPEPTIN_RECEPTOR_SYSTEM_IN_THE_OVARY			1.888		4.334
								REACTOME_UPTAKE_AND_ACTIONS_OF_BACTERIAL_TOXINS		1.405	2.422		4.445			WP_IL17_SIGNALING_PATHWAY					1.961
								REACTOME_SIGNALING_BY_FGFR3		1.393		1.681	2.196			WP_VITAMIN_B12_DISORDERS				1.305
								REACTOME_MRNA_SPLICING_MINOR_PATHWAY		1.372						WP_CANONICAL_AND_NONCANONICAL_NOTCH_SIGNALING					3.175
								REACTOME_INTERLEUKIN_27_SIGNALING	1.54	1.37		1.383				WP_HEMATOPOIETIC_STEM_CELL_GENE_REGULATION_BY_GABP_ALPHABETA_COMPLEX					4.271
								REACTOME_BIOTIN_TRANSPORT_AND_METABOLISM		1.37			1.85			WP_RAS_AND_BRADYKININ_PATHWAYS_IN_COVID19					1.866
								REACTOME_CLEC7A_DECTIN_1_INDUCES_NFAT_ACTIVATION		1.37			4.399			WP_SARSCOV2_MITOCHONDRIAL_INTERACTIONS					1.56
								REACTOME_SEMA4D_INDUCED_CELL_MIGRATION_AND_GROWTH_CONE_COLLAPSE	1.89	1.356	1.864	1.71	3.136			WP_FOLATE_METABOLISM					2.587
								REACTOME_SUMOYLATION_OF_INTRACELLULAR_RECEPTORS		1.356	3.01	1.365	4.242			WP_REGULATION_OF_SISTER_CHROMATID_SEPARATION_AT_THE_METAPHASEANAPHASE_TRANSITION					1.658
								REACTOME_SIGNALING_BY_FGFR4		1.356		1.672	2.099			WP_UNFOLDED_PROTEIN_RESPONSE					1.897
								REACTOME_SYNTHESIS_SECRETION_AND_INACTIVATION_OF_GLUCAGON_LIKE_PEPTIDE_1_GLP_1		1.356						WP_INHIBITION_OF_EXOSOME_BIOGENESIS_AND_SECRETION_BY_MANUMYCIN_A_IN_CRPC_CELLS				1.803
								REACTOME_TIGHT_JUNCTION_INTERACTIONS		1.356			2.528			WP_CARDIAC_PROGENITOR_DIFFERENTIATION			2.227	1.389	5.5
								REACTOME_DOWNSTREAM_SIGNALING_OF_ACTIVATED_FGFR2		1.356		2.6	1.657			WP_BMP2WNT4FOXO1_PATHWAY_IN_HUMAN_PRIMARY_ENDOMETRIAL_STROMAL_CELL_DIFFERENTIATION					3.762
								REACTOME_TRANSCRIPTIONAL_REGULATION_BY_VENTX		1.356			2.099			WP_TYROBP_CAUSAL_NETWORK			3.236		4.017
								REACTOME_NEDDYLATION		1.356			5.004			WP_SPHINGOLIPID_PATHWAY					1.371
								REACTOME_CELLULAR_RESPONSE_TO_CHEMICAL_STRESS		1.356	2.027		3.137			WP_MAMMALIAN_DISORDER_OF_SEXUAL_DEVELOPMENT				1.507	4.014
								REACTOME_NUCLEAR_ENVELOPE_BREAKDOWN		1.343	1.661		2.086			WP_PILOCYTIC_ASTROCYTOMA					1.748
								REACTOME_SIGNALING_BY_INSULIN_RECEPTOR		1.343	3.308	1.865	6.628			WP_ALZHEIMERS_DISEASE			1.529		4.998
								REACTOME_MITOTIC_METAPHASE_AND_ANAPHASE		1.323			4.092			WP_NANOPARTICLE_TRIGGERED_REGULATED_NECROSIS			1.318
								REACTOME_UNFOLDED_PROTEIN_RESPONSE_UPR		1.318			3.546			WP_SOMATIC_SEX_DETERMINATION					1.809
								REACTOME_TRAFFICKING_OF_AMPA_RECEPTORS		1.314		1.339	3.411			WP_EICOSANOID_METABOLISM_VIA_LIPO_OXYGENASES_LOX				2.038	6.184
								REACTOME_TRANSCRIPTIONAL_REGULATION_OF_PLURIPOTENT_STEM_CELLS		1.314			2.391			WP_NRF2_PATHWAY			2.585		9.705
								REACTOME_RND1_GTPASE_CYCLE		1.314	1.673		2.821			WP_IMATINIB_AND_CHRONIC_MYELOID_LEUKEMIA					3.108
								REACTOME_RUNX2_REGULATES_BONE_DEVELOPMENT		1.314		1.339	5.366			WP_OXYSTEROLS_DERIVED_FROM_CHOLESTEROL					3.909
								REACTOME_AMINE_LIGAND_BINDING_RECEPTORS		1.314	1.673	2.191	2.821			WP_STRIATED_MUSCLE_CONTRACTION_PATHWAY					4.71
								REACTOME_DISASSEMBLY_OF_THE_DESTRUCTION_COMPLEX_AND_RECRUITMENT_OF_AXIN_TO_THE_MEMBRANE		1.314			1.576			WP_SARSCOV2_AND_ANGIOTENSINCONVERTING_ENZYME_2_RECEPTOR_MOLECULAR_MECHANISMS					1.478
								REACTOME_FGFR1_MUTANT_RECEPTOR_ACTIVATION		1.314		1.339	2.883			WP_INTERACTIONS_BETWEEN_IMMUNE_CELLS_AND_MICRORNAS_IN_TUMOR_MICROENVIRONMENT					1.578
								REACTOME_INTERACTION_BETWEEN_L1_AND_ANKYRINS		1.314	3.604	1.947	6.165			WP_SIGNAL_TRANSDUCTION_OF_S1P_RECEPTOR			1.593
								REACTOME_SIGNALING_BY_TYPE_1_INSULIN_LIKE_GROWTH_FACTOR_1_RECEPTOR_IGF1R		1.314	3.071	2.387	4.527			WP_ALLOGRAFT_REJECTION			2.948	3.308	11.331
								REACTOME_CELLULAR_RESPONSE_TO_HYPOXIA					2.941			WP_GDNFRET_SIGNALLING_AXIS				1.608
								REACTOME_UNBLOCKING_OF_NMDA_RECEPTORS_GLUTAMATE_BINDING_AND_ACTIVATION				4.24	5.137			WP_GLYCOSAMINOGLYCAN_DEGRADATION					1.507
								REACTOME_THE_PHOTOTRANSDUCTION_CASCADE					4.659			WP_OXIDATION_BY_CYTOCHROME_P450					2.4
								REACTOME_NEGATIVE_REGULATION_OF_NOTCH4_SIGNALING					1.409			WP_LUNG_FIBROSIS			1.421		6.589
								REACTOME_LIGAND_RECEPTOR_INTERACTIONS				1.593				WP_GABA_RECEPTOR_SIGNALING					2.753
								REACTOME_SYNTHESIS_OF_BILE_ACIDS_AND_BILE_SALTS_VIA_24_HYDROXYCHOLESTEROL					1.873			WP_SEROTONIN_RECEPTOR_467_AND_NR3C_SIGNALING			2.074
								REACTOME_G0_AND_EARLY_G1					1.584			WP_IL6_SIGNALING_PATHWAY					6.926
								REACTOME_DNA_REPLICATION_PRE_INITIATION					1.43			WP_SYNTHESIS_AND_DEGRADATION_OF_KETONE_BODIES					2.109
								REACTOME_REGULATION_OF_RUNX3_EXPRESSION_AND_ACTIVITY					1.633			WP_SARSCOV2_INNATE_IMMUNITY_EVASION_AND_CELLSPECIFIC_IMMUNE_RESPONSE					5.257
								REACTOME_VEGFR2_MEDIATED_CELL_PROLIFERATION			1.937					WP_SELECTIVE_EXPRESSION_OF_CHEMOKINE_RECEPTORS_DURING_TCELL_POLARIZATION					1.465
								REACTOME_TRANSCRIPTIONAL_REGULATION_BY_THE_AP_2_TFAP2_FAMILY_OF_TRANSCRIPTION_FACTORS			2.392	1.728	1.325			WP_REGULATION_OF_TOLLLIKE_RECEPTOR_SIGNALING_PATHWAY			1.631		7.41
								REACTOME_GLUCONEOGENESIS					2.471			WP_TGIF_DISRUPTION_OF_SHH_SIGNALING				2.51
								REACTOME_ORGANIC_CATION_TRANSPORT					1.434			WP_GLYCEROPHOSPHOLIPID_BIOSYNTHETIC_PATHWAY					1.371
								REACTOME_ERYTHROPOIETIN_ACTIVATES_PHOSPHOINOSITIDE_3_KINASE_PI3K					2.279
								REACTOME_SIGNALING_BY_TGF_BETA_RECEPTOR_COMPLEX_IN_CANCER				1.593	1.859
								REACTOME_G1_S_DNA_DAMAGE_CHECKPOINTS					1.369
								REACTOME_CELLULAR_RESPONSE_TO_HEAT_STRESS	1.475				3.447
								REACTOME_INTERLEUKIN_20_FAMILY_SIGNALING					3.792
								REACTOME_DEFECTIVE_B4GALT1_CAUSES_B4GALT1_CDG_CDG_2D					1.859
								REACTOME_SIGNALING_BY_RETINOIC_ACID			1.64		3.632
								REACTOME_SPHINGOLIPID_DE_NOVO_BIOSYNTHESIS					3.34
								REACTOME_PERK_REGULATES_GENE_EXPRESSION					2.739
								REACTOME_PHENYLALANINE_AND_TYROSINE_METABOLISM					1.85
								REACTOME_E2F_ENABLED_INHIBITION_OF_PRE_REPLICATION_COMPLEX_FORMATION				1.505
								REACTOME_SIGNAL_TRANSDUCTION_BY_L1					2.343
								REACTOME_HOMOLOGOUS_DNA_PAIRING_AND_STRAND_EXCHANGE					3.787
								REACTOME_CYTOCHROME_P450_ARRANGED_BY_SUBSTRATE_TYPE					3.052
								REACTOME_CYTOPROTECTION_BY_HMOX1			1.99		1.965
								REACTOME_SYNTHESIS_OF_PA			1.361		2.301
								REACTOME_DEFECTIVE_CHST3_CAUSES_SEDCJD			1.64
								REACTOME_TOXICITY_OF_BOTULINUM_TOXIN_TYPE_D_BOTD					1.989
								REACTOME_IRS_ACTIVATION			3.384		1.989
								REACTOME_TNF_SIGNALING			1.6
								REACTOME_STAT5_ACTIVATION_DOWNSTREAM_OF_FLT3_ITD_MUTANTS					2.858
								REACTOME_EGFR_TRANSACTIVATION_BY_GASTRIN				2.387
								REACTOME_ORGANIC_CATION_ANION_ZWITTERION_TRANSPORT					2.279
								REACTOME_SYNTHESIS_OF_SUBSTRATES_IN_N_GLYCAN_BIOSYTHESIS			1.702		4.262
								REACTOME_CARGO_RECOGNITION_FOR_CLATHRIN_MEDIATED_ENDOCYTOSIS				2.261	6.266
								REACTOME_HSP90_CHAPERONE_CYCLE_FOR_STEROID_HORMONE_RECEPTORS_SHR	1.59			1.307
								REACTOME_ASPARTATE_AND_ASPARAGINE_METABOLISM			1.322		3.372
								REACTOME_NOREPINEPHRINE_NEUROTRANSMITTER_RELEASE_CYCLE					2.93
								REACTOME_ERYTHROPOIETIN_ACTIVATES_STAT5					1.401
								REACTOME_ASSEMBLY_OF_ACTIVE_LPL_AND_LIPC_LIPASE_COMPLEXES				1.751	2.131
								REACTOME_NEGATIVE_REGULATION_OF_FGFR4_SIGNALING				1.339	2.391
								REACTOME_SHC_MEDIATED_CASCADE_FGFR4				2.395
								REACTOME_NTRK2_ACTIVATES_RAC1	1.958			1.871	3.144
								REACTOME_LOSS_OF_FUNCTION_OF_SMAD2_3_IN_CANCER				1.677	2.15
								REACTOME_INFECTION_WITH_MYCOBACTERIUM_TUBERCULOSIS					1.584
								REACTOME_RETROGRADE_NEUROTROPHIN_SIGNALLING					1.347
								REACTOME_PROTEIN_REPAIR			1.929
								REACTOME_TRANSCRIPTIONAL_ACTIVATION_OF_MITOCHONDRIAL_BIOGENESIS			1.598		2.621
								REACTOME_REGULATION_OF_COMMISSURAL_AXON_PATHFINDING_BY_SLIT_AND_ROBO			3.12	2.29	6.538
								REACTOME_DEFECTIVE_CHSY1_CAUSES_TPBS			2.525
								REACTOME_SYNTHESIS_OF_BILE_ACIDS_AND_BILE_SALTS_VIA_27_HYDROXYCHOLESTEROL					2.279
								REACTOME_CELLULAR_SENESCENCE					1.637
								REACTOME_RAB_GERANYLGERANYLATION					3.147
								REACTOME_RAF_ACTIVATION					2.471
								REACTOME_SHC1_EVENTS_IN_EGFR_SIGNALING				2.008
								REACTOME_MITOTIC_PROMETAPHASE			1.953		2.331
								REACTOME_ACTIVATION_OF_GENE_EXPRESSION_BY_SREBF_SREBP					2.004
								REACTOME_ANTIGEN_PROCESSING_CROSS_PRESENTATION			1.514		1.967
								REACTOME_GLUTATHIONE_SYNTHESIS_AND_RECYCLING					1.657
								REACTOME_REGULATION_OF_TP53_ACTIVITY_THROUGH_ACETYLATION					2.073
								REACTOME_BASIGIN_INTERACTIONS					1.39
								REACTOME_NEUROTOXICITY_OF_CLOSTRIDIUM_TOXINS					2.073
								REACTOME_TP53_REGULATES_TRANSCRIPTION_OF_GENES_INVOLVED_IN_CYTOCHROME_C_RELEASE					3.136
								REACTOME_PTK6_REGULATES_RTKS_AND_THEIR_EFFECTORS_AKT1_AND_DOK1	1.638
								REACTOME_LYSINE_CATABOLISM					1.657
								REACTOME_DNA_REPAIR					2.15
								REACTOME_PROLONGED_ERK_ACTIVATION_EVENTS			1.729		3.217
								REACTOME_ABACAVIR_TRANSPORT_AND_METABOLISM					1.434
								REACTOME_ACETYLCHOLINE_NEUROTRANSMITTER_RELEASE_CYCLE					3.151
								REACTOME_MATURATION_OF_PROTEIN_3A			2.341		1.634
								REACTOME_ESTROGEN_DEPENDENT_NUCLEAR_EVENTS_DOWNSTREAM_OF_ESR_MEMBRANE_SIGNALING					2.949
								REACTOME_PI3K_EVENTS_IN_ERBB2_SIGNALING				2.648	4.269
								REACTOME_LOSS_OF_FUNCTION_OF_MECP2_IN_RETT_SYNDROME			1.813		2.068
								REACTOME_DEFECTS_IN_VITAMIN_AND_COFACTOR_METABOLISM				1.643	1.71
								REACTOME_TOLL_LIKE_RECEPTOR_CASCADES			1.601		5.012
								REACTOME_ACYL_CHAIN_REMODELLING_OF_PS					3.349
								REACTOME_CONSTITUTIVE_SIGNALING_BY_OVEREXPRESSED_ERBB2				2.222
								REACTOME_HSF1_ACTIVATION					1.576
								REACTOME_TGF_BETA_RECEPTOR_SIGNALING_IN_EMT_EPITHELIAL_TO_MESENCHYMAL_TRANSITION	2.048		2.217	1.891
								REACTOME_HIV_INFECTION					3.863
								REACTOME_ACTIVATION_OF_THE_MRNA_UPON_BINDING_OF_THE_CAP_BINDING_COMPLEX_AND_EIFS_AND_SUBSEQUENT_BINDING_TO_43S					1.862
								REACTOME_RESOLUTION_OF_SISTER_CHROMATID_COHESION					1.867
								REACTOME_TGF_BETA_RECEPTOR_SIGNALING_ACTIVATES_SMADS					2.266
								REACTOME_SUPPRESSION_OF_APOPTOSIS					2.15
								REACTOME_O_LINKED_GLYCOSYLATION_OF_MUCINS			2.134		7.171
								REACTOME_FATTY_ACIDS					1.709
								REACTOME_SEROTONIN_NEUROTRANSMITTER_RELEASE_CYCLE					2.93
								REACTOME_TELOMERE_EXTENSION_BY_TELOMERASE					1.604
								REACTOME_POU5F1_OCT4_SOX2_NANOG_ACTIVATE_GENES_RELATED_TO_PROLIFERATION					1.495
								REACTOME_ACTIVATION_OF_MATRIX_METALLOPROTEINASES					4.252
								REACTOME_DNA_DAMAGE_REVERSAL			1.64
								REACTOME_SPHINGOLIPID_METABOLISM					5.87
								REACTOME_RECEPTOR_TYPE_TYROSINE_PROTEIN_PHOSPHATASES				1.71	3.848
								REACTOME_PHASE_4_RESTING_MEMBRANE_POTENTIAL					1.643
								REACTOME_MET_ACTIVATES_RAS_SIGNALING				2.222
								REACTOME_TRIGLYCERIDE_BIOSYNTHESIS					2.504
								REACTOME_DEFECTIVE_CHST14_CAUSES_EDS_MUSCULOCONTRACTURAL_TYPE			1.64
								REACTOME_NONSENSE_MEDIATED_DECAY_NMD					2.941
								REACTOME_RHO_GTPASES_ACTIVATE_KTN1	1.54
								REACTOME_GENE_AND_PROTEIN_EXPRESSION_BY_JAK_STAT_SIGNALING_AFTER_INTERLEUKIN_12_STIMULATION					1.657
								REACTOME_GLYCOLYSIS			2.616		1.647
								REACTOME_OTHER_INTERLEUKIN_SIGNALING					1.917
								REACTOME_FGFR3B_LIGAND_BINDING_AND_ACTIVATION			1.771		2.15
								REACTOME_NEGATIVE_REGULATION_OF_MET_ACTIVITY					3.585
								REACTOME_THE_CANONICAL_RETINOID_CYCLE_IN_RODS_TWILIGHT_VISION					2.051
								REACTOME_HIV_LIFE_CYCLE					1.321
								REACTOME_APC_C_MEDIATED_DEGRADATION_OF_CELL_CYCLE_PROTEINS					1.735
								REACTOME_DNA_REPLICATION					1.39
								REACTOME_EGFR_DOWNREGULATION					3.411
								REACTOME_SHC1_EVENTS_IN_ERBB2_SIGNALING			1.729	3.087	2.742
								REACTOME_REGULATION_OF_RUNX2_EXPRESSION_AND_ACTIVITY					2.775
								REACTOME_TP53_REGULATES_TRANSCRIPTION_OF_SEVERAL_ADDITIONAL_CELL_DEATH_GENES_WHOSE_SPECIFIC_ROLES_IN_P53_DEPENDENT_APOPTOSIS_REMAIN_UNCERTAIN	1.394		1.729		2.504
								REACTOME_NOTCH4_INTRACELLULAR_DOMAIN_REGULATES_TRANSCRIPTION			1.864		1.985
								REACTOME_DERMATAN_SULFATE_BIOSYNTHESIS			1.322
								REACTOME_RNA_POLYMERASE_III_TRANSCRIPTION					2.504
								REACTOME_M_PHASE					3.012
								REACTOME_ROLE_OF_SECOND_MESSENGERS_IN_NETRIN_1_SIGNALING	1.59				2.073
								REACTOME_RESPONSE_OF_EIF2AK1_HRI_TO_HEME_DEFICIENCY					2.279
								REACTOME_SARS_COV_1_GENOME_REPLICATION_AND_TRANSCRIPTION					1.652
								REACTOME_SEMA4D_IN_SEMAPHORIN_SIGNALING	1.77		1.607	2.222	5.012
								REACTOME_SEROTONIN_AND_MELATONIN_BIOSYNTHESIS					1.989
								REACTOME_KETONE_BODY_METABOLISM					1.434
								REACTOME_G_BETA_GAMMA_SIGNALLING_THROUGH_PI3KGAMMA	1.723				1.795
								REACTOME_RHO_GTPASES_ACTIVATE_CIT	1.934				1.643
								REACTOME_MITOTIC_SPINDLE_CHECKPOINT					2.171
								REACTOME_RUNX1_REGULATES_TRANSCRIPTION_OF_GENES_INVOLVED_IN_DIFFERENTIATION_OF_MYELOID_CELLS					2.15
								REACTOME_RRNA_PROCESSING					2.875
								REACTOME_SIGNALING_BY_RNF43_MUTANTS					2.691
								REACTOME_INACTIVATION_OF_CDC42_AND_RAC1					1.859
								REACTOME_PLASMA_LIPOPROTEIN_REMODELING				1.909	2.266
								REACTOME_G_PROTEIN_BETA_GAMMA_SIGNALLING	2.133				1.48
								REACTOME_TNFR2_NON_CANONICAL_NF_KB_PATHWAY					2.823
								REACTOME_SIGNALING_BY_HIPPO					3.136
								REACTOME_GLUCOCORTICOID_BIOSYNTHESIS					1.434
								REACTOME_ANCHORING_OF_THE_BASAL_BODY_TO_THE_PLASMA_MEMBRANE					1.732
								REACTOME_REGULATION_OF_GENE_EXPRESSION_IN_EARLY_PANCREATIC_PRECURSOR_CELLS				2.476
								REACTOME_FGFR2_LIGAND_BINDING_AND_ACTIVATION				1.71
								REACTOME_ARMS_MEDIATED_ACTIVATION					3.136
								REACTOME_NS1_MEDIATED_EFFECTS_ON_HOST_PATHWAYS					1.419
								REACTOME_DISEASES_OF_CARBOHYDRATE_METABOLISM					1.309
								REACTOME_INTERACTIONS_OF_REV_WITH_HOST_CELLULAR_PROTEINS					1.403
								REACTOME_RESPONSE_OF_EIF2AK4_GCN2_TO_AMINO_ACID_DEFICIENCY					5.266
								REACTOME_GAMMA_CARBOXYLATION_HYPUSINE_FORMATION_AND_ARYLSULFATASE_ACTIVATION					2.39
								REACTOME_ERBB2_REGULATES_CELL_MOTILITY	1.346			1.947	2.949
								REACTOME_BIOSYNTHESIS_OF_SPECIALIZED_PRORESOLVING_MEDIATORS_SPMS					2.131
								REACTOME_SIGNALING_BY_FLT3_FUSION_PROTEINS					2.131
								REACTOME_DEREGULATED_CDK5_TRIGGERS_MULTIPLE_NEURODEGENERATIVE_PATHWAYS_IN_ALZHEIMER_S_DISEASE_MODELS			1.729		2.184
								REACTOME_RAF_INDEPENDENT_MAPK1_3_ACTIVATION					2.051
								REACTOME_TRIGLYCERIDE_METABOLISM					2.017
								REACTOME_DOWNSTREAM_SIGNALING_OF_ACTIVATED_FGFR4				2.094	1.584
								REACTOME_INTERFERON_ALPHA_BETA_SIGNALING					2.441
								REACTOME_SIGNALING_BY_ERBB2_ECD_MUTANTS				2.648
								REACTOME_FGFR2_ALTERNATIVE_SPLICING					1.584
								REACTOME_TRNA_PROCESSING_IN_THE_NUCLEUS					1.373
								REACTOME_BLOOD_GROUP_SYSTEMS_BIOSYNTHESIS			1.792		2.931
								REACTOME_DEGRADATION_OF_GLI1_BY_THE_PROTEASOME					1.311
								REACTOME_NUCLEAR_IMPORT_OF_REV_PROTEIN					1.309
								REACTOME_PI_3K_CASCADE_FGFR4				1.71	2.526
								REACTOME_GRB7_EVENTS_IN_ERBB2_SIGNALING				1.871
								REACTOME_CREB3_FACTORS_ACTIVATE_GENES					1.634
								REACTOME_NA_CL_DEPENDENT_NEUROTRANSMITTER_TRANSPORTERS			1.357		4.134
								REACTOME_INTERLEUKIN_6_FAMILY_SIGNALING					1.917
								REACTOME_SYNTHESIS_OF_BILE_ACIDS_AND_BILE_SALTS_VIA_7ALPHA_HYDROXYCHOLESTEROL					1.917
								REACTOME_ZBP1_DAI_MEDIATED_INDUCTION_OF_TYPE_I_IFNS					1.401
								REACTOME_MET_RECEPTOR_RECYCLING				1.436	2.073
								REACTOME_N_GLYCAN_ANTENNAE_ELONGATION					2.279
								REACTOME_GAP_JUNCTION_ASSEMBLY				1.728
								REACTOME_TRANSCRIPTION_COUPLED_NUCLEOTIDE_EXCISION_REPAIR_TC_NER					1.564
								REACTOME_RUNX2_REGULATES_OSTEOBLAST_DIFFERENTIATION					4.269
								REACTOME_SUMOYLATION_OF_UBIQUITINYLATION_PROTEINS					1.579
								REACTOME_TRANSCRIPTION_OF_E2F_TARGETS_UNDER_NEGATIVE_CONTROL_BY_P107_RBL1_AND_P130_RBL2_IN_COMPLEX_WITH_HDAC1					1.572
								REACTOME_REGULATION_OF_TP53_ACTIVITY_THROUGH_PHOSPHORYLATION					2.277
								REACTOME_RUNX3_REGULATES_YAP1_MEDIATED_TRANSCRIPTION					2.691
								REACTOME_TETRAHYDROBIOPTERIN_BH4_SYNTHESIS_RECYCLING_SALVAGE_AND_REGULATION	1.59
								REACTOME_P75NTR_REGULATES_AXONOGENESIS					2.073
								REACTOME_PD_1_SIGNALING			1.901	2.058	2.83
								REACTOME_ANTIVIRAL_MECHANISM_BY_IFN_STIMULATED_GENES					2.699
								REACTOME_INTERLEUKIN_15_SIGNALING					2.504
								REACTOME_GLI_PROTEINS_BIND_PROMOTERS_OF_HH_RESPONSIVE_GENES_TO_PROMOTE_TRANSCRIPTION			1.771	2.6	3.136
								REACTOME_ROS_AND_RNS_PRODUCTION_IN_PHAGOCYTES	2.026				2.672
								REACTOME_NICOTINAMIDE_SALVAGING					1.643
								REACTOME_ACYL_CHAIN_REMODELLING_OF_PE					1.39
								REACTOME_FRS_MEDIATED_FGFR2_SIGNALING				2.851	1.39
								REACTOME_ALPHA_LINOLENIC_OMEGA3_AND_LINOLEIC_OMEGA6_ACID_METABOLISM	1.443
								REACTOME_COBALAMIN_CBL_VITAMIN_B12_TRANSPORT_AND_METABOLISM			2.44	1.677	1.847
								REACTOME_APC_C_CDH1_MEDIATED_DEGRADATION_OF_CDC20_AND_OTHER_APC_C_CDH1_TARGETED_PROTEINS_IN_LATE_MITOSIS_EARLY_G1					1.786
								REACTOME_SYNTHESIS_OF_PROSTAGLANDINS_PG_AND_THROMBOXANES_TX					1.709
								REACTOME_FRS_MEDIATED_FGFR4_SIGNALING				2.303
								REACTOME_PTK6_EXPRESSION			2.134
								REACTOME_PHASE_I_FUNCTIONALIZATION_OF_COMPOUNDS					4.092
								REACTOME_MISMATCH_REPAIR					1.709
								REACTOME_MET_ACTIVATES_RAP1_AND_RAC1			2.027	1.383	2.543
								REACTOME_NOD1_2_SIGNALING_PATHWAY					2.225
								REACTOME_ACTIVATED_NTRK2_SIGNALS_THROUGH_FRS2_AND_FRS3				2.222	1.85
								REACTOME_DISINHIBITION_OF_SNARE_FORMATION					1.989
								REACTOME_REGULATION_OF_MECP2_EXPRESSION_AND_ACTIVITY					2.739
								REACTOME_REGULATION_OF_LIPID_METABOLISM_BY_PPARALPHA			2.859		5.357
								REACTOME_NR1H3_NR1H2_REGULATE_GENE_EXPRESSION_LINKED_TO_CHOLESTEROL_TRANSPORT_AND_EFFLUX			1.44		1.741
								REACTOME_MET_ACTIVATES_PTPN11				1.871	1.989
								REACTOME_WNT_LIGAND_BIOGENESIS_AND_TRAFFICKING			2.022	2.148	3.156
								REACTOME_CONSTITUTIVE_SIGNALING_BY_AKT1_E17K_IN_CANCER	1.687				1.678
								REACTOME_PI_3K_CASCADE_FGFR2			1.661	2.261	2.561
								REACTOME_CONSTITUTIVE_SIGNALING_BY_EGFRVIII				1.947
								REACTOME_DOWNSTREAM_SIGNALING_EVENTS_OF_B_CELL_RECEPTOR_BCR					3.116
								REACTOME_TP53_REGULATES_METABOLIC_GENES					1.795
								REACTOME_REGULATION_BY_C_FLIP					1.85
								REACTOME_CREB1_PHOSPHORYLATION_THROUGH_THE_ACTIVATION_OF_ADENYLATE_CYCLASE			1.921
								REACTOME_RECRUITMENT_OF_MITOTIC_CENTROSOME_PROTEINS_AND_COMPLEXES			1.855
								REACTOME_INTERLEUKIN_10_SIGNALING					4.228
								REACTOME_REGULATION_OF_TP53_EXPRESSION_AND_DEGRADATION					2.116
								REACTOME_SODIUM_COUPLED_SULPHATE_DI_AND_TRI_CARBOXYLATE_TRANSPORTERS					1.989
								REACTOME_RUNX1_REGULATES_EXPRESSION_OF_COMPONENTS_OF_TIGHT_JUNCTIONS					1.989
								REACTOME_REGULATION_OF_LOCALIZATION_OF_FOXO_TRANSCRIPTION_FACTORS	1.489				2.279
								REACTOME_NEGATIVE_REGULATION_OF_TCF_DEPENDENT_SIGNALING_BY_WNT_LIGAND_ANTAGONISTS			1.64		1.709
								REACTOME_NR1H2_NR1H3_REGULATE_GENE_EXPRESSION_TO_CONTROL_BILE_ACID_HOMEOSTASIS					1.634
								REACTOME_G2_M_CHECKPOINTS					1.339
								REACTOME_METABOLISM_OF_NITRIC_OXIDE_NOS3_ACTIVATION_AND_REGULATION	2.092				1.709
								REACTOME_KERATAN_SULFATE_DEGRADATION					2.748
								REACTOME_SIGNALING_BY_PDGFRA_TRANSMEMBRANE_JUXTAMEMBRANE_AND_KINASE_DOMAIN_MUTANTS				1.339
								REACTOME_TRANSCRIPTIONAL_REGULATION_BY_RUNX1					5.245
								REACTOME_RECYCLING_OF_BILE_ACIDS_AND_SALTS					1.572
								REACTOME_TERMINATION_OF_O_GLYCAN_BIOSYNTHESIS					5.333
								REACTOME_SELENOAMINO_ACID_METABOLISM					4.416
								REACTOME_ACTIVATION_OF_RAC1					2.068
								REACTOME_SHC1_EVENTS_IN_ERBB4_SIGNALING					1.347
								REACTOME_DOWNREGULATION_OF_TGF_BETA_RECEPTOR_SIGNALING					2.614
								REACTOME_DARPP_32_EVENTS			4.512		1.491
								REACTOME_TP53_REGULATES_TRANSCRIPTION_OF_DEATH_RECEPTORS_AND_LIGANDS					3.034
								REACTOME_INTERFERON_GAMMA_SIGNALING			3.071	3.521	9.159
								REACTOME_RUNX1_REGULATES_TRANSCRIPTION_OF_GENES_INVOLVED_IN_BCR_SIGNALING	1.85
								REACTOME_PEROXISOMAL_LIPID_METABOLISM					1.39
								REACTOME_SEMA4D_MEDIATED_INHIBITION_OF_CELL_ATTACHMENT_AND_MIGRATION				1.593	2.691
								REACTOME_SYNTHESIS_OF_BILE_ACIDS_AND_BILE_SALTS					3.454
								REACTOME_MECP2_REGULATES_NEURONAL_RECEPTORS_AND_CHANNELS			2.775		3.633
								REACTOME_RAP1_SIGNALLING					2.089
								REACTOME_LDL_CLEARANCE			1.357
								REACTOME_FORMATION_OF_RNA_POL_II_ELONGATION_COMPLEX	1.59
								REACTOME_REGULATION_OF_TNFR1_SIGNALING			1.531
								REACTOME_MTORC1_MEDIATED_SIGNALLING	1.77
								REACTOME_REGULATION_OF_HSF1_MEDIATED_HEAT_SHOCK_RESPONSE					2.383
								REACTOME_FATTY_ACYL_COA_BIOSYNTHESIS					2.116
								REACTOME_PEPTIDE_LIGAND_BINDING_RECEPTORS					5.846
								REACTOME_FRS_MEDIATED_FGFR3_SIGNALING				2.395	1.516
								REACTOME_TRANS_GOLGI_NETWORK_VESICLE_BUDDING					2.196
								REACTOME_ZINC_TRANSPORTERS					1.433
								REACTOME_POST_CHAPERONIN_TUBULIN_FOLDING_PATHWAY				1.595
								REACTOME_PTK6_REGULATES_RHO_GTPASES_RAS_GTPASE_AND_MAP_KINASES			1.729		1.873
								REACTOME_ANTIGEN_PRESENTATION_FOLDING_ASSEMBLY_AND_PEPTIDE_LOADING_OF_CLASS_I_MHC					1.795
								REACTOME_INOSITOL_PHOSPHATE_METABOLISM			2.341		2.169
								REACTOME_YAP1_AND_WWTR1_TAZ_STIMULATED_GENE_EXPRESSION					1.709
								REACTOME_SIGNALING_BY_ACTIVIN			2.595		1.495
								REACTOME_EXTENSION_OF_TELOMERES					1.614
								REACTOME_METABOLISM_OF_FAT_SOLUBLE_VITAMINS					2.963
								REACTOME_REGULATION_OF_EXPRESSION_OF_SLITS_AND_ROBOS	1.551		1.784		7.16
								REACTOME_ENOS_ACTIVATION	1.54
								REACTOME_TFAP2_AP_2_FAMILY_REGULATES_TRANSCRIPTION_OF_GROWTH_FACTORS_AND_THEIR_RECEPTORS			1.64	1.947
								REACTOME_DEFECTIVE_GALNT3_CAUSES_FAMILIAL_HYPERPHOSPHATEMIC_TUMORAL_CALCINOSIS_HFTC					3.418
								REACTOME_THE_ROLE_OF_NEF_IN_HIV_1_REPLICATION_AND_DISEASE_PATHOGENESIS			1.901	1.417	2.83
								REACTOME_SHC_RELATED_EVENTS_TRIGGERED_BY_IGF1R				2.387
								REACTOME_AKT_PHOSPHORYLATES_TARGETS_IN_THE_NUCLEUS	1.59				2.073
								REACTOME_NUCLEOTIDE_SALVAGE			1.661		1.604
								REACTOME_ATTACHMENT_OF_GPI_ANCHOR_TO_UPAR				1.677	1.401
								REACTOME_EICOSANOIDS				1.339	3.034
								REACTOME_SIGNALING_BY_FLT3_ITD_AND_TKD_MUTANTS					2.089
								REACTOME_NEF_MEDIATED_CD4_DOWN_REGULATION			1.514
								REACTOME_VISUAL_PHOTOTRANSDUCTION					8.518
								REACTOME_TRANSCRIPTION_OF_E2F_TARGETS_UNDER_NEGATIVE_CONTROL_BY_DREAM_COMPLEX					1.643
								REACTOME_BICARBONATE_TRANSPORTERS					2.073
								REACTOME_GABA_SYNTHESIS_RELEASE_REUPTAKE_AND_DEGRADATION			1.937		3.364
								REACTOME_CREB1_PHOSPHORYLATION_THROUGH_NMDA_RECEPTOR_MEDIATED_ACTIVATION_OF_RAS_SIGNALING			1.389	2.667	4.68
								REACTOME_CLASS_C_3_METABOTROPIC_GLUTAMATE_PHEROMONE_RECEPTORS			1.361		1.918
								REACTOME_GASTRIN_CREB_SIGNALLING_PATHWAY_VIA_PKC_AND_MAPK			1.417	2.5
								REACTOME_DEGRADATION_OF_AXIN					1.347
								REACTOME_FLT3_SIGNALING_IN_DISEASE					2.83
								REACTOME_METABOLISM_OF_PORPHYRINS					1.584
								REACTOME_ACTIVATION_OF_THE_TFAP2_AP_2_FAMILY_OF_TRANSCRIPTION_FACTORS				1.339
								REACTOME_REGULATION_OF_IFNG_SIGNALING					1.873
								REACTOME_INFLUENZA_INFECTION					4.512
								REACTOME_REGULATION_OF_RAS_BY_GAPS					2.519
								REACTOME_TOLL_LIKE_RECEPTOR_TLR1_TLR2_CASCADE					1.657
								REACTOME_COPII_MEDIATED_VESICLE_TRANSPORT					3.641
								REACTOME_HDR_THROUGH_SINGLE_STRAND_ANNEALING_SSA					4.092
								REACTOME_METABOLISM_OF_STEROIDS			1.672		5.756
								REACTOME_HEME_SIGNALING			2.886		3.411
								REACTOME_DOPAMINE_NEUROTRANSMITTER_RELEASE_CYCLE					2.561
								REACTOME_BIOLOGICAL_OXIDATIONS			2.111		4.666
								REACTOME_REGULATION_OF_PTEN_STABILITY_AND_ACTIVITY					1.832
								REACTOME_HUR_ELAVL1_BINDS_AND_STABILIZES_MRNA			1.64
								REACTOME_PROSTACYCLIN_SIGNALLING_THROUGH_PROSTACYCLIN_RECEPTOR				1.751
								REACTOME_DEFECTIVE_ST3GAL3_CAUSES_MCT12_AND_EIEE15					1.859
								REACTOME_RUNX3_REGULATES_P14_ARF					1.434
								REACTOME_ASYMMETRIC_LOCALIZATION_OF_PCP_PROTEINS					1.604
								REACTOME_REDUCTION_OF_CYTOSOLIC_CA_LEVELS					1.657
								REACTOME_RAS_ACTIVATION_UPON_CA2_INFLUX_THROUGH_NMDA_RECEPTOR				2.395	5.506
								REACTOME_SIGNALING_BY_ROBO_RECEPTORS	2.162		2.799		12.201
								REACTOME_CASPASE_ACTIVATION_VIA_EXTRINSIC_APOPTOTIC_SIGNALLING_PATHWAY					3.156
								REACTOME_SIGNALING_BY_FGFR4_IN_DISEASE				1.383
								REACTOME_CREB1_PHOSPHORYLATION_THROUGH_THE_ACTIVATION_OF_CAMKII_CAMKK_CAMKIV_CASCASDE	1.696
								REACTOME_PHYSIOLOGICAL_FACTORS				1.339
								REACTOME_ACTIVATED_NTRK2_SIGNALS_THROUGH_CDK5					1.652
								REACTOME_CELLULAR_RESPONSE_TO_STARVATION	1.662				5.932
								REACTOME_ASSEMBLY_OF_THE_ORC_COMPLEX_AT_THE_ORIGIN_OF_REPLICATION				1.751
								REACTOME_BILE_ACID_AND_BILE_SALT_METABOLISM					4.715
								REACTOME_INTERLEUKIN_21_SIGNALING					2.858
								REACTOME_INFLAMMASOMES					2.343
								REACTOME_HIGHLY_CALCIUM_PERMEABLE_NICOTINIC_ACETYLCHOLINE_RECEPTORS					2.338
								REACTOME_PYRIMIDINE_CATABOLISM				1.339	1.657
								REACTOME_DEUBIQUITINATION					2.15
								REACTOME_VXPX_CARGO_TARGETING_TO_CILIUM					1.847
								REACTOME_FGFR2C_LIGAND_BINDING_AND_ACTIVATION			1.813	2.078
								REACTOME_ARACHIDONIC_ACID_METABOLISM					4.805
								REACTOME_NEGATIVE_REGULATION_OF_NMDA_RECEPTOR_MEDIATED_NEURONAL_TRANSMISSION			1.792	2.373	7.099
								REACTOME_IRS_MEDIATED_SIGNALLING			3.461	2.01	3.411
								REACTOME_TRAIL_SIGNALING					1.859
								REACTOME_PHASE_1_INACTIVATION_OF_FAST_NA_CHANNELS				1.677
								REACTOME_INTRINSIC_PATHWAY_FOR_APOPTOSIS					4.905
								REACTOME_NEGATIVE_REGULATION_OF_FGFR2_SIGNALING				1.85	2.471
								REACTOME_DDX58_IFIH1_MEDIATED_INDUCTION_OF_INTERFERON_ALPHA_BETA					1.884
								REACTOME_TERMINATION_OF_TRANSLESION_DNA_SYNTHESIS					1.48
								REACTOME_MISCELLANEOUS_TRANSPORT_AND_BINDING_EVENTS			1.491		2.614
								REACTOME_THE_ACTIVATION_OF_ARYLSULFATASES					1.495
								REACTOME_HIGHLY_CALCIUM_PERMEABLE_POSTSYNAPTIC_NICOTINIC_ACETYLCHOLINE_RECEPTORS					1.85
								REACTOME_NEGATIVE_REGULATION_OF_MAPK_PATHWAY					1.585
								REACTOME_REGULATION_OF_MRNA_STABILITY_BY_PROTEINS_THAT_BIND_AU_RICH_ELEMENTS			1.357
								REACTOME_HIV_ELONGATION_ARREST_AND_RECOVERY	1.529
								REACTOME_CATION_COUPLED_CHLORIDE_COTRANSPORTERS					2.15
								REACTOME_PEROXISOMAL_PROTEIN_IMPORT					2.262
								REACTOME_VITAMIN_C_ASCORBATE_METABOLISM			1.64
								REACTOME_GROWTH_HORMONE_RECEPTOR_SIGNALING					2.4
								REACTOME_SIGNALING_BY_FGFR3_FUSIONS_IN_CANCER				1.436	1.434
								REACTOME_PRE_NOTCH_PROCESSING_IN_GOLGI			2.022		2.299
								REACTOME_INTERLEUKIN_35_SIGNALLING	1.489			1.339	1.657
								REACTOME_SIALIC_ACID_METABOLISM			2.751		8.073
								REACTOME_COPI_MEDIATED_ANTEROGRADE_TRANSPORT			1.313	1.474	1.709
								REACTOME_REGULATION_OF_CHOLESTEROL_BIOSYNTHESIS_BY_SREBP_SREBF			1.598		2.259
								REACTOME_METABOLISM_OF_NUCLEOTIDES			2.433		3.724
								REACTOME_REGULATION_OF_FOXO_TRANSCRIPTIONAL_ACTIVITY_BY_ACETYLATION			1.411
								REACTOME_ATF4_ACTIVATES_GENES_IN_RESPONSE_TO_ENDOPLASMIC_RETICULUM_STRESS					1.989
								REACTOME_TRANSPORT_OF_MATURE_TRANSCRIPT_TO_CYTOPLASM					1.71
								REACTOME_SIGNALING_BY_EGFR			1.778	1.436	4.128
								REACTOME_HOST_INTERACTIONS_OF_HIV_FACTORS			1.54		3.669
								REACTOME_CROSS_PRESENTATION_OF_SOLUBLE_EXOGENOUS_ANTIGENS_ENDOSOMES					1.677
								REACTOME_TNFS_BIND_THEIR_PHYSIOLOGICAL_RECEPTORS					2.184
								REACTOME_PTEN_REGULATION					3.694
								REACTOME_MAPK6_MAPK4_SIGNALING					2.503
								REACTOME_PURINERGIC_SIGNALING_IN_LEISHMANIASIS_INFECTION					1.678
								REACTOME_CHEMOKINE_RECEPTORS_BIND_CHEMOKINES					3.986
								REACTOME_SULFUR_AMINO_ACID_METABOLISM					1.48
								REACTOME_HDR_THROUGH_HOMOLOGOUS_RECOMBINATION_HRR					2.954
								REACTOME_NEUROTRANSMITTER_RELEASE_CYCLE			1.337		5.615
								REACTOME_NEGATIVE_REGULATORS_OF_DDX58_IFIH1_SIGNALING					2.941
								REACTOME_ENDOGENOUS_STEROLS			1.389		1.48
								REACTOME_APOPTOTIC_CLEAVAGE_OF_CELL_ADHESION_PROTEINS					2.543
								REACTOME_SIGNALING_BY_NOTCH2					1.747
								REACTOME_TYPE_I_HEMIDESMOSOME_ASSEMBLY			2.027
								REACTOME_FLT3_SIGNALING_THROUGH_SRC_FAMILY_KINASES			1.929		2.55
								REACTOME_COHESIN_LOADING_ONTO_CHROMATIN					1.434
								REACTOME_UPTAKE_AND_FUNCTION_OF_ANTHRAX_TOXINS			1.322		1.85
								REACTOME_ACTIVATION_OF_BAD_AND_TRANSLOCATION_TO_MITOCHONDRIA					2.279
								REACTOME_MITOTIC_G2_G2_M_PHASES			1.31		3.126
								REACTOME_STAT5_ACTIVATION					3.136
								REACTOME_TP53_REGULATES_TRANSCRIPTION_OF_CELL_DEATH_GENES			2.027		5.128
								REACTOME_PI_3K_CASCADE_FGFR3			1.417	1.788	2.93
								REACTOME_SIGNALING_BY_NOTCH4					2.699
								REACTOME_SIGNAL_REGULATORY_PROTEIN_FAMILY_INTERACTIONS					1.572
								REACTOME_RUNX3_REGULATES_NOTCH_SIGNALING					1.873
								REACTOME_HEDGEHOG_LIGAND_BIOGENESIS					1.546
								REACTOME_DNA_DOUBLE_STRAND_BREAK_REPAIR					1.545
								REACTOME_MET_ACTIVATES_PI3K_AKT_SIGNALING				1.751	1.652
								REACTOME_ACTIVATION_OF_RAC1_DOWNSTREAM_OF_NMDARS					2.15
								REACTOME_SIGNALING_BY_NODAL			1.864		2.526
								REACTOME_VITAMIN_B5_PANTOTHENATE_METABOLISM					1.433
								REACTOME_UPTAKE_AND_FUNCTION_OF_DIPHTHERIA_TOXIN			1.929
								REACTOME_FGFR1C_LIGAND_BINDING_AND_ACTIVATION				1.339
								REACTOME_THE_NLRP3_INFLAMMASOME					2.714
								REACTOME_MYD88_INDEPENDENT_TLR4_CASCADE					3.122
								REACTOME_ROBO_RECEPTORS_BIND_AKAP5			2.341	1.505
								REACTOME_TYROSINE_CATABOLISM					1.989
								REACTOME_INTERLEUKIN_2_SIGNALING					1.657
								REACTOME_ERYTHROPOIETIN_ACTIVATES_RAS				2.008
								REACTOME_TRAF3_DEPENDENT_IRF_ACTIVATION_PATHWAY					1.873
								REACTOME_ACTIVATION_OF_IRF3_IRF7_MEDIATED_BY_TBK1_IKK_EPSILON					2.504
								REACTOME_ERBB2_ACTIVATES_PTK6_SIGNALING				2.078	2.748
								REACTOME_UBIQUINOL_BIOSYNTHESIS			1.64
								REACTOME_NRCAM_INTERACTIONS					2.15
								REACTOME_ACYL_CHAIN_REMODELLING_OF_PC					1.989
								REACTOME_SHC_MEDIATED_CASCADE_FGFR1				2.373
								REACTOME_NUCLEOTIDE_EXCISION_REPAIR					1.558
								REACTOME_AMINO_ACIDS_REGULATE_MTORC1	1.629				1.347
								REACTOME_TICAM1_DEPENDENT_ACTIVATION_OF_IRF3_IRF7					1.657
								REACTOME_IMMUNOREGULATORY_INTERACTIONS_BETWEEN_A_LYMPHOID_AND_A_NON_LYMPHOID_CELL					2.255
								REACTOME_LECTIN_PATHWAY_OF_COMPLEMENT_ACTIVATION				1.593
								REACTOME_RUNX2_REGULATES_GENES_INVOLVED_IN_CELL_MIGRATION					1.859
								REACTOME_FIBRONECTIN_MATRIX_FORMATION					1.652
								REACTOME_AKT_PHOSPHORYLATES_TARGETS_IN_THE_CYTOSOL					1.347
								REACTOME_REGULATION_OF_HMOX1_EXPRESSION_AND_ACTIVITY					1.546
								REACTOME_RHOBTB2_GTPASE_CYCLE					2.561
								REACTOME_ABC_TRANSPORTER_DISORDERS			1.637		1.616
								REACTOME_ACTIVATED_NTRK2_SIGNALS_THROUGH_FYN	1.777			1.677	4.464
								REACTOME_ACTIVATION_OF_BH3_ONLY_PROTEINS					4.903
								REACTOME_METABOLISM_OF_POLYAMINES					2.259
								REACTOME_SIGNALING_BY_EGFR_IN_CANCER				1.518
								REACTOME_NEGATIVE_REGULATION_OF_FGFR1_SIGNALING					2.596
								REACTOME_MITOTIC_TELOPHASE_CYTOKINESIS					1.495
								REACTOME_RUNX1_AND_FOXP3_CONTROL_THE_DEVELOPMENT_OF_REGULATORY_T_LYMPHOCYTES_TREGS					1.434
								REACTOME_NEGATIVE_REGULATION_OF_FGFR3_SIGNALING				1.387	2.676
								REACTOME_PLASMA_LIPOPROTEIN_ASSEMBLY_REMODELING_AND_CLEARANCE			2.2	1.991	2.601
								REACTOME_DIGESTION_AND_ABSORPTION					1.873
								REACTOME_CASPASE_ACTIVATION_VIA_DEATH_RECEPTORS_IN_THE_PRESENCE_OF_LIGAND					2.089
								REACTOME_TRNA_PROCESSING					1.307
								REACTOME_CALCITONIN_LIKE_LIGAND_RECEPTORS					1.434
								REACTOME_SYNTHESIS_OF_IP3_AND_IP4_IN_THE_CYTOSOL			2.022		1.678
								REACTOME_TELOMERE_C_STRAND_LAGGING_STRAND_SYNTHESIS					1.309
								REACTOME_GLYCOSPHINGOLIPID_METABOLISM					2.895
								REACTOME_RUNX1_INTERACTS_WITH_CO_FACTORS_WHOSE_PRECISE_EFFECT_ON_RUNX1_TARGETS_IS_NOT_KNOWN					2.116
								REACTOME_METABOLISM_OF_COFACTORS			1.937
								REACTOME_KERATINIZATION			1.491		8.498
								REACTOME_RHO_GTPASES_ACTIVATE_NADPH_OXIDASES	1.77		2.867		1.917
								REACTOME_METABOLISM_OF_INGESTED_SEMET_SEC_MESEC_INTO_H2SE			1.64
								REACTOME_EUKARYOTIC_TRANSLATION_INITIATION					3.563
								REACTOME_SERINE_BIOSYNTHESIS					1.634
								REACTOME_RHO_GTPASES_ACTIVATE_ROCKS	1.934				1.643
								REACTOME_TRANSPORT_OF_VITAMINS_NUCLEOSIDES_AND_RELATED_MOLECULES					2.179
								REACTOME_PCP_CE_PATHWAY	1.578				3.926
								REACTOME_INSULIN_RECEPTOR_RECYCLING					3.156
								REACTOME_METHIONINE_SALVAGE_PATHWAY					2.55
								REACTOME_TRANSCRIPTIONAL_REGULATION_OF_TESTIS_DIFFERENTIATION					2.748
								REACTOME_SUMOYLATION_OF_TRANSCRIPTION_COFACTORS					2.279
								REACTOME_MITOCHONDRIAL_FATTY_ACID_BETA_OXIDATION					2.116
								REACTOME_PHOSPHOLIPASE_C_MEDIATED_CASCADE_FGFR2			1.417	1.788
								REACTOME_NEGATIVE_REGULATION_OF_FLT3					2.279
								REACTOME_INTERCONVERSION_OF_NUCLEOTIDE_DI_AND_TRIPHOSPHATES			1.338		2.184
								REACTOME_REGULATION_OF_GENE_EXPRESSION_IN_BETA_CELLS					2.343
								REACTOME_SOS_MEDIATED_SIGNALLING				1.677
								REACTOME_HORMONE_LIGAND_BINDING_RECEPTORS					1.657
								REACTOME_P75NTR_NEGATIVELY_REGULATES_CELL_CYCLE_VIA_SC1	1.85
								REACTOME_HYDROLYSIS_OF_LPC					3.221
								REACTOME_CALCINEURIN_ACTIVATES_NFAT			1.514		2.338
								REACTOME_CYTOSOLIC_SENSORS_OF_PATHOGEN_ASSOCIATED_DNA					1.657
								REACTOME_CHK1_CHK2_CDS1_MEDIATED_INACTIVATION_OF_CYCLIN_B_CDK1_COMPLEX					1.495
								REACTOME_SEPARATION_OF_SISTER_CHROMATIDS					2.899
								REACTOME_SYNTHESIS_OF_LEUKOTRIENES_LT_AND_EOXINS_EX					2.931
								REACTOME_KERATAN_SULFATE_BIOSYNTHESIS			1.389		5.43
								REACTOME_POST_TRANSLATIONAL_MODIFICATION_SYNTHESIS_OF_GPI_ANCHORED_PROTEINS			2.168	2.01	4.489
								REACTOME_CARGO_TRAFFICKING_TO_THE_PERICILIARY_MEMBRANE					1.917
								REACTOME_TRAFFICKING_OF_GLUR2_CONTAINING_AMPA_RECEPTORS			1.49		1.433
								REACTOME_ANTIMICROBIAL_PEPTIDES			1.736		2.514
								REACTOME_RNA_POLYMERASE_III_TRANSCRIPTION_TERMINATION					2.051
								REACTOME_ACTIVATED_NTRK2_SIGNALS_THROUGH_PI3K				1.677	3.136
								REACTOME_RECRUITMENT_OF_NUMA_TO_MITOTIC_CENTROSOMES	1.54		1.792
								REACTOME_CD28_DEPENDENT_VAV1_PATHWAY			1.921	1.339	2.279
								REACTOME_MUSCARINIC_ACETYLCHOLINE_RECEPTORS				1.871
								REACTOME_GLUTAMATE_NEUROTRANSMITTER_RELEASE_CYCLE					4.269
								REACTOME_RETROGRADE_TRANSPORT_AT_THE_TRANS_GOLGI_NETWORK					3.763
								REACTOME_SRP_DEPENDENT_COTRANSLATIONAL_PROTEIN_TARGETING_TO_MEMBRANE					3.147
								REACTOME_INTERLEUKIN_1_SIGNALING					3.722
								REACTOME_DETOXIFICATION_OF_REACTIVE_OXYGEN_SPECIES					1.741
								REACTOME_IRON_UPTAKE_AND_TRANSPORT					3.096
								REACTOME_BIOSYNTHESIS_OF_EPA_DERIVED_SPMS					1.652
								REACTOME_SYNTHESIS_SECRETION_AND_DEACYLATION_OF_GHRELIN					1.643
								REACTOME_SIGNALING_BY_LEPTIN			1.322		2.543
								REACTOME_STRIATED_MUSCLE_CONTRACTION					4.269
								REACTOME_CHL1_INTERACTIONS					1.634
								REACTOME_ACTIVATION_OF_PUMA_AND_TRANSLOCATION_TO_MITOCHONDRIA			1.514		3.221
								REACTOME_KERATAN_SULFATE_KERATIN_METABOLISM					6.875
								REACTOME_GAB1_SIGNALOSOME					1.919
								REACTOME_ACYL_CHAIN_REMODELLING_OF_PG					1.772
								REACTOME_CARGO_CONCENTRATION_IN_THE_ER					3.636
								REACTOME_INTERLEUKIN_6_SIGNALING				1.383	2.543
								REACTOME_ACTIVATION_OF_THE_PHOTOTRANSDUCTION_CASCADE					2.543
								REACTOME_SIGNALING_BY_CYTOSOLIC_FGFR1_FUSION_MUTANTS					2.93
								REACTOME_INSULIN_PROCESSING			2.577		2.988
								REACTOME_DOWNSTREAM_SIGNALING_OF_ACTIVATED_FGFR3				2.19	1.795
								REACTOME_ABACAVIR_TRANSMEMBRANE_TRANSPORT					1.989
								REACTOME_G1_S_SPECIFIC_TRANSCRIPTION					1.765
								REACTOME_SIGNALING_BY_FGFR_IN_DISEASE			1.702	1.681	3.361
								REACTOME_GOLGI_ASSOCIATED_VESICLE_BIOGENESIS					1.851
								REACTOME_SPRY_REGULATION_OF_FGF_SIGNALING					1.572
								REACTOME_RIPK1_MEDIATED_REGULATED_NECROSIS					1.39
								REACTOME_N_GLYCAN_ANTENNAE_ELONGATION_IN_THE_MEDIAL_TRANS_GOLGI					2.116
								REACTOME_ACTIVATION_OF_TRKA_RECEPTORS				1.751	1.652
								REACTOME_ACTIVATED_NTRK3_SIGNALS_THROUGH_RAS				1.593
								REACTOME_SYNTHESIS_OF_5_EICOSATETRAENOIC_ACIDS					1.634
								REACTOME_NICOTINATE_METABOLISM					1.576
								REACTOME_TIE2_SIGNALING					1.308
								REACTOME_FRS_MEDIATED_FGFR1_SIGNALING				2.261	1.604
								REACTOME_CELLULAR_HEXOSE_TRANSPORT			1.792		4.333
								REACTOME_RESOLUTION_OF_D_LOOP_STRUCTURES_THROUGH_SYNTHESIS_DEPENDENT_STRAND_ANNEALING_SDSA			1.491		2.116
								REACTOME_INLB_MEDIATED_ENTRY_OF_LISTERIA_MONOCYTOGENES_INTO_HOST_CELL					1.709
								REACTOME_AMINO_ACID_TRANSPORT_ACROSS_THE_PLASMA_MEMBRANE			1.638		4.252
								REACTOME_ESTROGEN_STIMULATED_SIGNALING_THROUGH_PRKCZ				1.751
								REACTOME_PTK6_REGULATES_CELL_CYCLE			1.929
								REACTOME_PLATELET_SENSITIZATION_BY_LDL					1.433
								REACTOME_MISCELLANEOUS_SUBSTRATES					3.034
								REACTOME_GRB2_EVENTS_IN_ERBB2_SIGNALING				2.648	2.089
								REACTOME_REGULATION_OF_GENE_EXPRESSION_BY_HYPOXIA_INDUCIBLE_FACTOR			1.322
								REACTOME_SIGNALING_BY_FGFR2_IN_DISEASE				2.175	1.585
								REACTOME_FORMATION_OF_THE_CORNIFIED_ENVELOPE			1.59		12.599
								REACTOME_CELL_CYCLE_CHECKPOINTS					2.899
								REACTOME_RESOLUTION_OF_D_LOOP_STRUCTURES					2.471
								REACTOME_INTERFERON_SIGNALING			3.193	2.077	9.159
								REACTOME_SENSORY_PERCEPTION					7.063
								REACTOME_PYROPTOSIS					1.584
								REACTOME_NOSTRIN_MEDIATED_ENOS_TRAFFICKING					1.989
								REACTOME_NGF_INDEPENDANT_TRKA_ACTIVATION				1.871
								REACTOME_PYRUVATE_METABOLISM_AND_CITRIC_ACID_TCA_CYCLE					1.347
								REACTOME_EUKARYOTIC_TRANSLATION_ELONGATION					4.117
								REACTOME_NOTCH3_ACTIVATION_AND_TRANSMISSION_OF_SIGNAL_TO_THE_NUCLEUS					1.795
								REACTOME_DEFECTIVE_C1GALT1C1_CAUSES_TN_POLYAGGLUTINATION_SYNDROME_TNPS					3.151
								REACTOME_G_PROTEIN_ACTIVATION					1.917
								REACTOME_REGULATION_OF_BETA_CELL_DEVELOPMENT					4.333
								REACTOME_RND3_GTPASE_CYCLE					3.266
								REACTOME_PROTEIN_LOCALIZATION			1.678		1.476
								REACTOME_DISEASES_OF_MITOTIC_CELL_CYCLE					1.657
								REACTOME_ACTIVATED_NOTCH1_TRANSMITS_SIGNAL_TO_THE_NUCLEUS			1.729		1.956
								REACTOME_ARYL_HYDROCARBON_RECEPTOR_SIGNALLING			1.64
								REACTOME_TOLL_LIKE_RECEPTOR_9_TLR9_CASCADE					2.428
								REACTOME_BETA_OXIDATION_OF_PRISTANOYL_COA	1.638
								REACTOME_CAMK_IV_MEDIATED_PHOSPHORYLATION_OF_CREB	1.59			1.436	1.434
								REACTOME_MAPK3_ERK1_ACTIVATION				1.436
								REACTOME_GENERATION_OF_SECOND_MESSENGER_MOLECULES			1.808	1.709	1.918
								REACTOME_NEUROFASCIN_INTERACTIONS			1.771	1.677	2.15
								REACTOME_ACYL_CHAIN_REMODELLING_OF_PI					1.919
								REACTOME_LEUKOTRIENE_RECEPTORS				1.871
								REACTOME_ROLE_OF_ABL_IN_ROBO_SLIT_SIGNALING					2.691
								REACTOME_NUCLEOTIDE_BINDING_DOMAIN_LEUCINE_RICH_REPEAT_CONTAINING_RECEPTOR_NLR_SIGNALING_PATHWAYS					3.769
								REACTOME_COOPERATION_OF_PDCL_PHLP1_AND_TRIC_CCT_IN_G_PROTEIN_BETA_FOLDING					1.657
								REACTOME_MITOCHONDRIAL_TRNA_AMINOACYLATION					1.401
								REACTOME_SHC_MEDIATED_CASCADE_FGFR3				2.5
								REACTOME_BMAL1_CLOCK_NPAS2_ACTIVATES_CIRCADIAN_GENE_EXPRESSION			1.434		1.989
								REACTOME_ABERRANT_REGULATION_OF_MITOTIC_G1_S_TRANSITION_IN_CANCER_DUE_TO_RB1_DEFECTS					1.919
								REACTOME_ACTIVATED_NTRK2_SIGNALS_THROUGH_RAS				2.387
								REACTOME_ACETYLCHOLINE_REGULATES_INSULIN_SECRETION			1.411		2.073
								REACTOME_SEROTONIN_RECEPTORS				2.159	2.279
								REACTOME_SIGNALING_BY_NTRK2_TRKB				2.19	4.034
								REACTOME_BIOSYNTHESIS_OF_THE_N_GLYCAN_PRECURSOR_DOLICHOL_LIPID_LINKED_OLIGOSACCHARIDE_LLO_AND_TRANSFER_TO_A_NASCENT_PROTEIN			1.601		3.384
								REACTOME_RHOV_GTPASE_CYCLE					4.883
								REACTOME_GLYCEROPHOSPHOLIPID_CATABOLISM			1.771		1.401
								REACTOME_CDC6_ASSOCIATION_WITH_THE_ORC_ORIGIN_COMPLEX				1.383
								REACTOME_MAPK1_ERK2_ACTIVATION				1.505	2.338
								REACTOME_CREATINE_METABOLISM				1.383
								REACTOME_HSF1_DEPENDENT_TRANSACTIVATION	2.63				2.423
								REACTOME_DOWNREGULATION_OF_ERBB2_ERBB3_SIGNALING	1.443				2.068
								REACTOME_ERYTHROCYTES_TAKE_UP_OXYGEN_AND_RELEASE_CARBON_DIOXIDE			1.514
								REACTOME_SUMOYLATION_OF_DNA_DAMAGE_RESPONSE_AND_REPAIR_PROTEINS					2.45
								REACTOME_AURKA_ACTIVATION_BY_TPX2	1.364		1.778
								REACTOME_GLYOXYLATE_METABOLISM_AND_GLYCINE_DEGRADATION					1.576
								REACTOME_RHO_GTPASES_ACTIVATE_PAKS	1.849		2.44		1.401
								REACTOME_TNFR1_INDUCED_PROAPOPTOTIC_SIGNALING			1.813
								REACTOME_PI_3K_CASCADE_FGFR1				1.677	2.931
								REACTOME_SIGNALING_BY_FGFR1_IN_DISEASE			1.404	1.728	2.873
								REACTOME_DISSOLUTION_OF_FIBRIN_CLOT					1.495
								REACTOME_PROCESSIVE_SYNTHESIS_ON_THE_C_STRAND_OF_THE_TELOMERE					1.643
								REACTOME_RUNX2_REGULATES_CHONDROCYTE_MATURATION				1.871
								REACTOME_DECTIN_2_FAMILY					4.469
								REACTOME_INTERLEUKIN_4_AND_INTERLEUKIN_13_SIGNALING	1.346		2.777		7.36
								REACTOME_REGULATION_OF_GENE_EXPRESSION_IN_LATE_STAGE_BRANCHING_MORPHOGENESIS_PANCREATIC_BUD_PRECURSOR_CELLS					1.572
								REACTOME_TRANSFERRIN_ENDOCYTOSIS_AND_RECYCLING					4.034
								REACTOME_ESR_MEDIATED_SIGNALING			2.129		2.765
								REACTOME_RHOU_GTPASE_CYCLE					2.941
								REACTOME_GLUCOSE_METABOLISM			2.667		3.188
								REACTOME_AFLATOXIN_ACTIVATION_AND_DETOXIFICATION				1.751

## Sheet: Supplementary Table 3
Supplementary Table 3. Epigenetic changes in genes targeted by immune-related transcription factors (TF) in humans and guinea pig (Cavia Porcellus) with TB.
GeneSet	-log10(pValue) Cavia_lung.ALL_genes	-log10(pValue) Cavia_Spleen.ALL_genes	-log10(pValue) CD14_TB.ALL_genes	-log10(pValue) CD4_TB.ALL_genes	-log10(pValue) CD8_TB.ALL_genes		Overlapping gene count CD4_TB.ALL_genes	Overlapping gene count CD8_TB.ALL_genes	Overlapping gene count CD14_TB.ALL_genes	Overlapping gene count Cavia_Spleen.ALL_genes	Overlapping gene count Cavia_lung.ALL_genes
ZNF92_TARGET_GENES	16.176	61.89	28.911	16.715	79.093		84	555	189	247	68
AACTTT_UNKNOWN	21.179	60.845	50.009	17.505	100		102	874	275	290	89
CAGCTG_AP4_Q5	6.895	53.563	46.85	13.461	100		80	637	233	241	50
HMGB1_TARGET_GENES	9.853	53.481	41.566	12.662	100		78	652	222	240	57
TGGAAA_NFAT_Q4_01	15.699	49.515	45.604	13.617	100		93	804	266	269	79
RYTTCCTG_ETS2_B	10.132	43.976	22.722	4.877	83.997		45	474	147	185	48
GGGTGGRR_PAX4_03	6.763	43.135	26.826	11.678	85.762		69	533	173	202	45
NFKBIA_TARGET_GENES	6.353	40.053	35.591	7.843	72.357		60	508	192	197	44
ZFP91_TARGET_GENES	6.456	36.907	15.649	7.965	63.772		64	522	155	202	47
FOXP2_TARGET_GENES	9.855	35.238	25.204	5.7	77.734		70	679	219	239	66
ZSCAN30_TARGET_GENES	7.753	34.872	27.787	4.843	68.537		62	613	212	224	57
TGANTCA_AP1_C	7.933	34.778	20.094	6.177	78.265		50	471	143	171	44
TCF7_TARGET_GENES	7.484	33.801	16.573	7.01	65.993		76	664	198	240	61
SUPT16H_TARGET_GENES	8.529	33.563	21.239	3.915	48.919		63	607	209	236	63
ZSCAN4_TARGET_GENES	6.153	32.028	21.382	7.107	59.399		49	401	136	155	37
KDM7A_TARGET_GENES	5.209	31.942	21.497	2.074	64.056		51	623	202	224	51
RYBP_TARGET_GENES	9.28	30.896	28.531	9.111	50.444		79	591	222	223	63
TGACCTY_ERR1_Q2	5.39	29.441	22.743	5.584	69.421		46	433	143	154	36
CBFA2T2_TARGET_GENES	2.762	29.167	15.409	4.754	57.052		60	569	173	206	39
ZNF592_TARGET_GENES	10.628	29.024	14.739	2.055	43.421		52	578	185	221	67
RTAAACA_FREAC2_01	13.675	28.602	21.845	9.444	100		52	454	130	141	50
ZNF768_TARGET_GENES	4.501	28.436	19.021	5.046	60.165		52	489	157	176	39
TAATTA_CHX10_01	7.287	27.861	24.985	10.848	81.75		51	385	126	129	35
TTANTCA_UNKNOWN	10.485	26.752	16.871	3.156	70.619		35	408	121	140	45
ZNF740_TARGET_GENES	6.427	26.752	12.693	2.321	37.398		40	422	136	169	44
CTTTGA_LEF1_Q2	8.592	25.778	27.438	14.99	100		74	547	169	162	48
GCANCTGNY_MYOD_Q6	8.356	25.662	28.748	9.914	77.953		53	412	144	135	40
ZNF436_TARGET_GENES	5.424	25.231	6.89	4.93	24.443		27	187	57	93	23
TGTTTGY_HNF3_Q6	13.941	25.154	19.471	9.682	60.67		46	327	108	117	45
SALL4_TARGET_GENES	5.218	25.052	5.692	1.452	45.155		47	571	144	207	51
TGACAGNY_MEIS1_01	9.446	24.455	12.354	6.445	73.886		42	380	100	125	40
ZNF184_TARGET_GENES	5.124	24.449	9.371	4.235	36.59		53	465	138	179	44
FOXN3_TARGET_GENES	4.489	24.259	21.899	3.706	41.246		51	480	177	179	42
CAGGTA_AREB6_01	10.658	23.605	16.829	7.414	48.36		43	319	107	119	41
NAB2_TARGET_GENES	7.434	23.524	17.594	1.635	56.747		41	523	166	178	51
CTGCAGY_UNKNOWN	8.824	23.14	21.482	10.077	54.21		48	324	115	116	37
TGCCAAR_NF1_Q6	7.484	23.016	21.845	3.851	56.881		31	314	111	111	33
GREB1_TARGET_GENES	10.788	22.994	16.542	5.454	47.635		42	355	118	130	45
HES2_TARGET_GENES	3.218	21.97	16.205	3.939	60.165		50	508	155	167	36
MAFG_TARGET_GENES	6.115	21.245	16.201	1.425	64.056		48	636	190	201	55
IRF9_TARGET_GENES	6.027	21.126	16.088	5.186	62.433		66	623	187	198	54
IGLV5_37_TARGET_GENES	3.674	21.105	18.094	5.186	49.829		32	275	95	99	22
YTATTTTNR_MEF2_02	6.622	20.977	17.072	8.273	43.357		42	285	100	106	31
RNGTGGGC_UNKNOWN	5.487	20.898	13.253	7.27	53.476		42	324	97	112	30
CTTTAAR_UNKNOWN	11.573	20.418	26.171	6.637	71.305		47	417	144	129	48
SKIL_TARGET_GENES	7.08	20.247	18.801	1.848	52.608		52	618	202	202	59
ZNF282_TARGET_GENES	7.898	19.85	12.948	4.406	34.671		42	354	118	133	42
SIX1_TARGET_GENES	2.821	19.753	6.952	2.989	36.658		18	175	47	71	14
ID1_TARGET_GENES	11.13	19.101	8.826		23.834			371	120	148	54
CACGTG_MYC_Q2	8.362	19.02	8.848	7.409	49.631		51	390	105	131	43
LHX9_TARGET_GENES	7.771	18.898	10.79	3.587	58.45		52	540	148	170	53
ZNF423_TARGET_GENES	6.536	18.787	16.89	5.265	37.932		45	364	129	131	39
HAND1_TARGET_GENES	3.869	18.786	9.378	2.281	18.851		19	168	62	80	19
TFEB_TARGET_GENES	7.709	18.657	18.574	5.019	51.571		53	479	159	156	49
BACH2_TARGET_GENES	4.671	18.643	15.733		60.401			652	196	201	52
ZNF664_TARGET_GENES	2.98	18.564	11.136	3.292	37.493		36	343	107	124	27
TATAAA_TATA_01	11.969	18.43	19.52	7.165	48.559		58	454	156	150	57
HMG20B_TARGET_GENES	6.239	18.125	18.733	4.037	59.089		63	630	200	194	56
GCM2_TARGET_GENES	7.529	18.083	19.619	3.744	71.039		63	675	207	198	61
ZBTB24_TARGET_GENES	5.772	17.7	8.663	1.349	34.586		41	482	142	169	48
E2F5_TARGET_GENES	3.422	17.412	15.254		26.436			381	141	144	34
AP4_Q5	2.151	17.356	11.317	5.984	16.758		21	108	47	56	10
RP58_01		17.335	15.337	5.7	24.926		18	105	47	49
TGGNNNNNNKCCAR_UNKNOWN	2.695	17.332	11.062	3.059	34.415		20	189	62	73	15
WGTTNNNNNAAA_UNKNOWN	5.772	17.238	12.192	2.286	36.667		21	227	75	84	25
TGCTGAY_UNKNOWN	4.947	17.052	13.816	4.763	46.491		28	243	78	83	23
NUP153_TARGET_GENES	2.771	16.712	3.866	1.846	22.231		45	447	121	169	38
CBX5_TARGET_GENES	5.145	16.632	10.434	4.842	26.763		38	286	96	110	31
ZNF410_TARGET_GENES	2.723	16.62	7.429	3.244	20.868		26	209	68	89	19
WTTGKCTG_UNKNOWN	6.199	16.309	7.113	3.575	29.62		24	203	59	79	25
PAX3_TARGET_GENES	5.113	16.229	26.213	3.179	71.473		56	633	212	180	50
LMTK3_TARGET_GENES	2.596	16.001	12.918	2.573	17.175		23	191	80	85	18
IK2_01	5.115	15.974	6.447	3.935	26.75		17	127	37	54	16
ZNF391_TARGET_GENES	1.363	15.837	7.573		28.629			312	93	115	20
CC2D1A_TARGET_GENES	2.756	15.598	7.956		24.486			368	115	137	31
DACH1_TARGET_GENES	2.974	15.584	8.585	2.052	19.054		31	290	99	117	27
HEN1_02	2.977	15.487	8.753	3.802	14.863		14	84	35	45	10
MYOCD_TARGET_GENES	1.492	15.41	16.091	2.435	25.132		22	207	85	82	14
ZNF449_TARGET_GENES	5.124	15.402	16.806	3.235	43.023		45	447	151	144	41
BRCA2_TARGET_GENES	1.836	15.34	5.741		28.837			422	117	149	30
INSM2_TARGET_GENES	2.657	15.235	5.277	1.342	26.444		24	277	76	104	23
RGAGGAARY_PU1_Q6	3.562	14.972	11.935	6.445	39.901		31	222	71	76	19
ZSCAN5DP_TARGET_GENES	2.974	14.96	6.967		24.771			396	119	144	34
PHB2_TARGET_GENES		14.957	2.583	1.62	8.177		9	69	21	44
SMAD3_Q6	8.362	14.95	9.182	7.313	15.451		22	97	40	49	20
CATTGTYY_SOX9_B1	5.774	14.9	8.021		26.205			154	49	62	20
RBM34_TARGET_GENES	3.566	14.822	10.813	2.212	19.148		33	302	110	119	30
YCATTAA_UNKNOWN	6.536	14.673	17.286	4.894	54.194		29	262	87	80	27
CREL_01	5.373	14.536	4.167		22.613			115	30	50	16
SP1_Q6_01	2.849	14.525	4.841	1.817	7.998		11	81	31	49	11
ZNF30_TARGET_GENES	3.962	14.331	8.133	3.498	28.136		51	448	136	155	41
AP4_Q6	2.186	14.215	10.658	3.386	15.831		14	93	41	46	9
AEBP2_TARGET_GENES	3.597	14.207	4.72		14.635			284	87	117	30
ZSCAN29_TARGET_GENES	4.409	14.165	10.9		38.435			562	171	179	49
MZF1_TARGET_GENES	5.385	14.15	6.762	2.055	59.365		42	514	124	148	44
GGGYGTGNY_UNKNOWN	2.028	14.134	10.961	3.016	36.565		27	263	83	89	18
PCGF2_TARGET_GENES	1.813	14.134	8.522	4.259	39.156		37	324	92	106	21
HEN1_01	3.517	14.122	6.243	5.454	16.463		17	87	30	43	11
BACH2_01	2.144	14.121	6.447		12.998			100	37	51	10
TAZ_TARGET_GENES	3.084	14.097	7.876	2.289	20.562		19	172	58	71	17
ZNF589_TARGET_GENES	4.793	14.074	12.051	3.298	20.166		28	223	86	89	26
AP1_Q2_01	2.565	14.066	6.412	3.506	17.95		16	111	37	51	11
E12_Q6	10.002	14.036	11.688	7.308	28.255		23	127	47	50	23
ZFP3_TARGET_GENES	3.022	13.966	8.919	3.616	10.432		19	114	50	59	14
ZNF660_TARGET_GENES		13.883	5.578	1.556	15.308		24	232	74	97
HEB_Q6	2.178	13.776	11.473	5.027	19.148		19	112	47	50	10
KMT2D_TARGET_GENES	3.867	13.717	10.321	3.587	46.702		32	314	90	97	26
ASH1L_TARGET_GENES	6.115	13.641	2.681		16.96			384	102	146	46
BACH1_01	2.233	13.549	5.963	2.02	13.274		12	98	35	49	10
ZNF596_TARGET_GENES	4.691	13.502	11.513	5.326	34.282		33	250	82	85	25
ZNF843_TARGET_GENES	2.642	13.498	5.583	4.955	30.69		39	302	81	104	24
BDP1_TARGET_GENES	4.759	13.455	11.871	3.755	27.852		36	301	104	106	31
ZNF528_TARGET_GENES	1.518	13.415	8.105		21.061			251	83	96	18
WGGAATGY_TEF1_Q6		13.394	8.166	2.16	28.578		16	164	51	61
ZNF2_TARGET_GENES	4.238	13.346	10.532	3.493	38.308		42	395	120	126	35
MYOGENIN_Q6	5.952	13.202	6.111	1.702	23.422		11	117	35	48	17
AML_Q6	3.562	13.18	7.028	3.159	20.184		15	114	38	49	13
ZNF7_TARGET_GENES	2.287	13.142	9.905	3.332	23.591		34	285	97	104	23
UBP1_TARGET_GENES	5.982	13.079	7.066		36.27			561	156	177	55
ZNF766_TARGET_GENES	3.84	13.068	13.098	1.483	33.359		33	384	129	126	34
AP2GAMMA_01	3.785	13.049	5.108	1.431	16.54		10	102	32	47	13
ZNF563_TARGET_GENES	1.672	13.012	3.309	2.723	15.537		25	199	55	83	16
AREB6_04	6.075	12.988	8.164	2.953	22.165		14	113	39	47	17
SFMBT1_TARGET_GENES	6.62	12.96	10.821	2.859	37.656		51	507	155	159	52
ZNF10_TARGET_GENES	2.741	12.939	7.771	2.065	19.865		27	254	84	97	23
ZNF513_TARGET_GENES	6.454	12.901	10.279	1.881	45.503		25	305	88	93	32
TGACATY_UNKNOWN	8.159	12.813	20.232	7.107	58.537		38	302	103	85	33
MTF1_Q4	2.299	12.805	7.559	2.484	15.995		13	102	38	47	10
PCGF1_TARGET_GENES	4.521	12.783	9.222	5.147	26.769		29	204	67	74	22
VDR_Q6	2.118	12.78	5.11	2.634	17.189		14	110	34	49	10
AP1_C		12.78	3.3	2.634	18.658		14	113	29	49
JDP2_TARGET_GENES	3.592	12.716	4.062		32.038			541	138	174	46
RGAANNTTC_HSF1_01	7.084	12.652	12.42	3.527	37.493		22	201	67	66	25
THAP1_TARGET_GENES	3.917	12.607	3.783		18.028			504	142	180	49
ETS2_B	3.405	12.482	4.574	2.989	24.217		15	125	33	49	13
SMTTTTGT_UNKNOWN	6.239	12.458	9.533	3.739	33.03		21	178	56	61	22
PAX7_TARGET_GENES	2.171	12.439	15.861	2.512	27.188		26	248	97	87	19
MIER1_TARGET_GENES	1.384	12.439	11.801	2.272	16.535		16	135	58	58	10
AP2ALPHA_01	3.917	12.429	5.425	2.654	16.302		13	99	32	45	13
ZNF134_TARGET_GENES	1.706	12.428	9.897	3.344	21.398		33	269	94	99	20
MYCMAX_B	3.511	12.383	3.373		16.626			108	29	48	13
ZNF224_TARGET_GENES	6.394	12.351	6.813	1.603	32.891		30	344	96	112	38
ZNF84_TARGET_GENES	3.607	12.341	10.005		35.305			577	175	180	48
CCCNNGGGAR_OLF1_01	1.365	12.258	14.965	5.43	28.495		22	146	59	53	9
SUMO1_TARGET_GENES	4.348	12.166	6.258		19.746			278	86	103	30
POU6F1_01	3.457	12.011	15.174	2.693	30.167		13	122	50	44	12
CIITA_TARGET_GENES	3.458	11.982	8	1.416	24.819		33	362	113	124	33
ZNF22_TARGET_GENES	5.509	11.897	10.123	1.34	20.946		32	343	119	122	39
FOXJ2_02	4.502	11.823	9.649	3.107	23.9		14	113	41	44	14
TGAYRTCA_ATF3_Q6	6.294	11.783	7.68	3.29	26.001		24	203	63	72	26
SRF_C	4.412	11.783	6.067	3.55	16.275		14	91	31	41	13
DBP_Q6	5.832	11.686	13.416	5.597	25.234		20	122	50	46	17
ZBTB12_TARGET_GENES	3.022	11.665	5.931	1.438	22.251		35	372	110	129	33
TGATTTRY_GFI1_01	5.271	11.654	14.446	5.995	34.76		22	147	55	49	17
RFX1_02	6.615	11.644	5.978	4.72	21.801		19	122	37	48	19
POU2AF1_TARGET_GENES	2.2	11.522	6.576		23.423			289	87	101	23
CUX1_TARGET_GENES	1.698	11.522	8.295	2.482	13.431		24	191	72	79	16
PAX4_01		11.521		1.619	18.785		11	111		46
CART1_01	4.157	11.505	5.952	3.758	22.289		15	106	32	42	13
IK3_01	2.147	11.505	5.518	2.423	13.807		12	90	31	42	9
MYOD_Q6	3.332	11.474	5.211	3.878	25.783		16	118	32	44	12
MEF2_01	3.85	11.455	4.707	3.849	14.469		12	68	22	33	10
ZNF213_TARGET_GENES	4.029	11.435	6.516		9.087			165	63	75	22
HOXC6_TARGET_GENES	2.729	11.423	2.708		19.154			338	87	121	30
PXR_Q2	4.777	11.421	6.946	2.055	18.417		12	108	37	45	15
SF1_Q6	1.847	11.421	4.843	1.364	13.186		10	97	32	45	9
ZIM3_TARGET_GENES	3.692	11.391	9.646		37.362			389	116	119	33
NFKAPPAB65_01	3.953	11.378	2.225		16.583			99	23	43	13
AP2_Q6_01	2.16	11.372	2.191		21.454			117	25	46	10
PRDM4_TARGET_GENES	2.902	11.341	9.427		20.24			165	60	63	16
OCT1_Q6	3.032	11.321	6.483	3.95	23.489		17	121	37	46	12
MYCMAX_02	1.748	11.321	5.65	5.459	24.599		20	123	35	46	9
NKX2_5_TARGET_GENES	5.226	11.294	11.321	1.888	38.932		36	408	126	123	39
HMGIY_Q6	2.791	11.261	8.164	1.424	28.737		10	124	39	44	11
COMP1_01	1.509	11.22	1.912	4.026	10.413		11	52	13	29	5
HBZ_TARGET_GENES	2.993	11.209	11.535		32.944			279	92	89	23
PAX_Q6	2.673	11.209	9.111	2.791	19.369		14	111	42	45	11
LMO2COM_02		11.209	8.095	3.527	18.716		15	104	38	43
SRF_Q5_01		11.182	7.029	4.343	13.854		16	89	34	41
GGATTA_PITX2_Q2	5.297	11.072	13.74	4.57	58.352		29	277	82	74	25
CEBPDELTA_Q6	3.357	11.036	11.066	3.91	19.315		16	106	44	43	12
CDPCR3HD_01	6.381	10.984	11.584	4.624	20.2		17	105	44	42	17
IRF7_01	3.21	10.984	4.909	1.71	20.274		11	111	32	44	12
SMAD_Q6	1.478	10.984	4.517	4.224	21.354		17	113	31	44	8
STAT5A_01	2.268	10.929	9.358		21.192			113	42	44	10
ER_Q6_02	1.857	10.929	5.69	3.298	20.124		15	111	34	44	9
IK1_01	2.062	10.787	6.117	4.791	18.81		19	115	37	46	10
STAT6_01	4.029	10.771	5.65	2.678	23.489		14	121	35	45	14
STAT5A_04	4.432	10.66	4.366	2.64	14.874		12	88	27	39	13
AP1_Q4_01		10.647	3.608	2.791	13.601		14	99	29	44
FXR1_TARGET_GENES	1.807	10.642	4.601		11.01			264	85	105	23
E47_01	6.032	10.585	7.6	7.01	18.123		22	106	38	43	17
OCT1_05	2.769	10.585	5.418	6.407	28.341		21	124	33	43	11
HP1SITEFACTOR_Q6	5.209	10.583	6.613	3.229	16.431		14	97	34	41	15
P300_01	3.229	10.532	4.195	2.484	12.333		13	94	30	43	12
OCT1_03	5.19	10.526	10.026	2.325	29.019		12	119	41	41	15
KDM5D_TARGET_GENES	2.795	10.508	20.897	4.666	47.997		58	529	184	148	38
ISL1_TARGET_GENES	4.193	10.501	13.834		33.585			287	100	89	27
ERR1_Q2	4.665	10.497	3.192	1.973	18.425		12	110	28	44	15
MYCMAX_01	3.218	10.485	1.913	2.086	14.454		12	99	23	43	12
FOXH1_TARGET_GENES	2.463	10.467	12.06	2.648	45.122		32	345	105	98	24
GATAAGR_GATA_C	2.302	10.467	6.762	7.066	27.987		24	137	40	47	11
NKX2_3_TARGET_GENES	1.662	10.467	3.625		17.523			179	49	68	14
PHF2_TARGET_GENES	3.972	10.461	12.354		33.838			454	148	138	40
SRF_Q6	3.846	10.428	8.391	5.453	19.696		19	107	39	42	13
MEIS1_01	1.549	10.372	5.211		17.975			104	32	42	8
YATGNWAAT_OCT_C	3.34	10.35	12.681	5.625	35.906		24	171	59	53	15
MGGAAGTG_GABP_B	4.841	10.312	5.418	1.654	28.396		24	266	72	86	28
SRF_Q4	3.077	10.312	6.818	2.408	17.688		12	98	34	40	11
AP1_Q4	1.386	10.297	6.097	3.131	16.415		15	107	36	44	8
HMBOX1_TARGET_GENES	3.076	10.295	7.858		33.391			380	110	116	31
BPTF_TARGET_GENES		10.233	7.933		31.17			277	82	87
E2A_Q2	5.436	10.155	5.489	4.311	18.928		17	107	33	42	16
ZBTB18_TARGET_GENES	2.616	10.146	12.567	2.951	23.739		31	271	100	91	23
KLF7_TARGET_GENES	3.65	10.106	5.995	1.938	20.349		29	280	85	97	28
E47_02	1.509	10.104	11.22	4.822	14.368		18	98	45	42	8
AAANWWTGC_UNKNOWN	4.784	10.069	12.627	2.055	20.794		10	93	41	36	13
AP4_01		10.069	10.614	5.102	13.926		19	100	45	43
STAT5B_01	3.749	10.056	6.265		16.132			102	35	42	13
ZIC3_01	1.892	10.056	7.138	3.786	17.619		16	105	37	42	9
COREBINDINGFACTOR_Q6	2.984	10.048	7.185	3.059	20.7		15	117	39	44	12
ZNF579_TARGET_GENES	1.914	10.039	8.339		21.52			218	73	76	17
ZNF146_TARGET_GENES		10.023	3.39		18.675			354	96	122
HNF1_Q6	3.737	10.009	6.227	4.259	20.054		17	110	35	42	13
PAX4_03	2.759	10.009	6.663	2.095	13.213		12	96	36	42	11
TEF1_Q6		9.922	5.593	3.794	15.545		15	93	31	39
FOXO1_01	4.968	9.884	7.436		24.766			116	37	41	15
HSF2_01	1.857	9.849	6.548	3.729	22.281		16	115	36	42	9
ADA2_TARGET_GENES	5.333	9.726	2.878		12.464			234	66	90	31
E2F2_TARGET_GENES	2.236	9.706	5.69		24.847			423	121	135	33
UBN1_TARGET_GENES	3.846	9.694	7.04	1.645	44.791		47	556	147	155	45
ZFHX3_TARGET_GENES	5.388	9.652	4.076		20.24			487	136	160	52
EBNA1BP2_TARGET_GENES	4.685	9.629	9.538	3.401	18.453		19	139	53	52	18
ATF3_Q6	3.773	9.621	4.29	2.52	15.433		13	100	30	41	13
STAT5A_03	3.5	9.621	5.987	2.654	23.155		14	121	36	43	13
TGACCTTG_SF1_Q6	2.33	9.621	7.682	1.424	12.242		10	93	38	41	10
TAAYNRNNTCC_UNKNOWN	3.38	9.593	8.581	3.322	15.724		12	78	32	33	10
OLF1_01	1.725	9.574	6.378	2.251	21.903		13	119	37	43	9
TGIF_01	3.255	9.572	7.18		24.277			117	37	41	12
GTGGGTGK_UNKNOWN	3.21	9.551	4.841	3.188	23.834		16	129	35	45	13
HSF1_01	4.521	9.529	6.341	3.483	25.051		16	125	37	43	15
MAZR_01	1.762	9.529	6.613	3.401	11.214		14	83	33	38	8
NGFIC_01	4.859	9.525	4.614	4.805	17.116		18	104	31	41	15
TAL1BETAITF2_01	2.652	9.501	10.563	1.635	26.245		11	124	45	42	11
CEBP_01	2.977	9.483	8.059	2.62	17.54		14	111	41	43	12
FEV_TARGET_GENES	1.836	9.466	3.307		26.824			470	119	146	34
GCTNWTTGK_UNKNOWN	1.465	9.462	7.185	3.416	22.369		17	130	42	46	9
HNF4_DR1_Q3	3.094	9.457	4.62	3.188	15.047		15	103	32	42	12
CACBINDINGPROTEIN_Q6	2.873	9.457	5.318	3.499	21.651		15	110	32	40	11
MEF2_02	2.527	9.441	8.462	1.945	18.357		11	101	38	39	10
ETS1_B	4.089	9.409	5.378	2.325	17.792		13	109	34	42	14
SOX5_01	3.566	9.409	9.93	3.59	32.135		16	134	44	42	13
ZF5_01	4.597	9.39	3.287	1.935	22.05		11	108	26	39	14
TFIII_Q6	2.387	9.368	6.883	5.829	11.921		18	80	32	36	9
OCT1_B	2.178	9.363	6.168	2.715	28.107		14	128	36	42	10
PBX1_02	5.613	9.361	7.135	3.144	13.202		10	61	25	28	12
CEBP_Q2	2.974	9.34	3.99	2.306	20.755		12	106	28	39	11
AP2_Q6		9.336	4.109	1.702	22.281		11	115	30	41
RSRFC4_01	2.839	9.312	11.503	3.45	17.975		15	104	45	40	11
SP3_Q3		9.312	3.312	1.459	8.634		10	83	27	40
TCF1P_Q6	4.596	9.273	6.097		15.011			104	36	42	15
HNF4ALPHA_Q6	1.386	9.273	5.684	2.692	15.011		14	104	35	42	8
AP1FJ_Q2		9.273	6.097	4.987	15.011		19	104	36	42
ZNF610_TARGET_GENES	1.583	9.238	5.776	1.467	26.726		26	292	82	92	20
ZNF561_TARGET_GENES	2.48	9.233	8.248	3.866	33.039		35	302	89	90	23
TCANNTGAY_SREBP1_01	2.022	9.227	7.907	2.297	24.492		19	181	58	60	14
LFA1_Q6	4.369	9.216	6.859	2.153	16.678		12	102	36	40	14
GLI4_TARGET_GENES	2.255	9.197	3.785		8.917			221	71	89	22
PAX4_02	5.109	9.194	11.408	3.575	27.343		15	118	44	39	15
USF_C	3.369	9.172	4.857	2.154	15.688		13	109	34	43	13
ZBTB7B_TARGET_GENES	2.124	9.168	4.944		29.585			542	146	163	40
CHAF1B_TARGET_GENES	5.333	9.144	4.157		15.034			274	81	98	34
AREB6_01	2.565	9.136	8.179	2.654	16.973		14	109	41	42	11
ZNF322_TARGET_GENES	4.947	9.135	9.025		31.766			317	97	95	32
ZNF350_TARGET_GENES	2.751	9.135	4.833	1.798	23.104		41	414	116	132	35
CP2_02	4.338	9.124	4.29	2.128	13.124		12	95	30	40	14
TTCYNRGAA_STAT5B_01	2.329	9.113	9.035		26.077			146	49	48	12
YTAATTAA_LHX3_01	2.096	9.11	8.128	2.09	21.369		10	93	33	34	8
PITX2_Q2	9.28	9.109	7.68	4.097	31.678		17	132	39	41	22
CIZ_01	2.32	9.077	7.64	2.117	19.303		12	108	38	40	10
GFI1_01	3.117	9.062	12.246	3.635	20.26		16	113	48	41	12
AP1_Q2	1.429	9.062	5.077	3.635	16.246		16	105	33	41	8
FOX_Q2	10.84	9.056	9.669	1.459	21.061		9	99	38	36	22
TAL1BETAE47_01	3.749	9.032	6.703	2.493	20.75		13	111	36	40	13
AP2_Q3	1.892	9.032	5.418	4.805	22.962		18	115	33	40	9
GCCATNTTG_YY1_Q6	1.963	9.023	2.607		18.97			157	38	56	13
CDC5_01	5.221	9.02	8.065	5.584	23.369		20	119	40	41	16
CREB3L4_TARGET_GENES		9.02	3.773		20.652			393	107	128
TFIIA_Q6	1.883	8.986	8.993		14.115			98	41	40	9
NKX62_Q2	4.449	8.956	9.494	5.479	26.36		19	118	41	39	14
GRE_C	1.879	8.948	2.742	2.648	12.555		9	59	16	27	6
ARID5B_TARGET_GENES	2.403	8.946	5.324		12.06			252	83	94	24
MYOD_Q6_01	2.751	8.94	4.94	7.502	16.349		23	103	32	40	11
PU1_Q6	2.08	8.936	7.024	5.7	14.807		19	94	35	38	9
AFP1_Q6	5.774	8.929	9.93	4.548	24.15		18	121	44	41	17
ZNF175_TARGET_GENES	2.332	8.926	8.854		21.31			263	89	87	22
SP1_Q4_01	3.198	8.845	3.395	3.298	5.513		15	76	28	40	12
AP1_Q6		8.845	6.548	2.442	11.16		13	92	36	40
OCT_C	3.551	8.835	9.326	3.565	24.374		16	122	43	41	13
NFAT_Q6	4.953	8.815	8.826		16.463			101	40	39	15
ELF1_Q6	1.549	8.815	5.211	1.459	16.463		10	101	32	39	8
GTGACGY_E4F1_Q6	4.557	8.805	8.515	5.154	20.568		33	220	75	74	25
WRNIP1_TARGET_GENES	3.196	8.745	4.105		20.225			297	82	98	28
PRKDC_TARGET_GENES	2.729	8.745	4.16	2.213	15.537		29	252	74	89	24
HOXA4_Q2	2.584	8.745	6.483	1.924	24.599		12	123	37	41	11
ZNF318_TARGET_GENES	2.239	8.722	3.643		14.953			161	46	60	15
AHRR_TARGET_GENES	5.235	8.72	7.212		26.803			406	121	124	42
NFRKB_TARGET_GENES	2.028	8.716	7.006		28.906			519	151	155	38
ZNF597_TARGET_GENES	5.85	8.701	9.251		27.871			291	93	89	33
MORC2_TARGET_GENES	3.563	8.667	5.632	1.822	29.528		52	546	151	162	47
RCGCANGCGY_NRF1_Q6	2.08	8.638			11.807			254		94	23
WTGAAAT_UNKNOWN	4.581	8.636	14.319	2.605	38.776		24	251	86	70	24
KLF14_TARGET_GENES		8.625	2.267		4.221			70	24	39
NR0B1_TARGET_GENES		8.561	3.395	1.616	13.762		10	91	26	37
USF_Q6_01	2.898	8.541	3.104	3.091	12.857		14	92	26	38	11
AP1_Q6_01	1.414	8.471	7.101		16.944			107	38	40	8
HNF1_01	2.873	8.441	7.524	2.212	14.922		12	97	37	38	11
RRAGTTGT_UNKNOWN	1.874	8.432	6.187	2.086	26.105		12	121	35	39	9
AP4_Q6_01	1.486	8.432	10.512	3.753	16.84		16	104	44	39	8
ZNF407_TARGET_GENES	1.336	8.428	5.631		23.152			524	152	162	36
PGM3_TARGET_GENES	3.562	8.382	1.474		5.719			79	22	40	13
EGR1_01	3.562	8.382	5.747	2.715	18.145		14	110	35	40	13
NF1_Q6	2.607	8.336	8.826		17.025			108	42	40	11
RSRFC4_Q2	2.756	8.306	10.001	3.059	18.111		13	95	39	35	10
FOXO1_02	4.953	8.3	10.404	3.878	34.324		16	131	43	38	15
SP1_Q6	2.72	8.294	2.415	3.29	8.736		15	86	25	39	11
TTCYRGAA_UNKNOWN	2.756	8.247	3.694	2.64	19.75		16	133	35	46	13
BRN2_01		8.214	10.359	3.587	23.856		15	112	42	37
HAND1E47_01		8.207	5.244	2.948	18.538		15	115	35	41
BARX2_TARGET_GENES	6.225	8.196	3.785		19.981			457	126	145	52
HDAC4_TARGET_GENES	4.061	8.19	8.581		21.825			226	76	73	24
YAATNRNNNYNATT_UNKNOWN		8.19	8.501	2.64	13.709		8	53	24	23
ZNF618_TARGET_GENES	2.138	8.187	11.321	3.545	31.919		49	440	142	127	32
ZNF197_TARGET_GENES	1.63	8.177	6.977		19.831			214	69	71	16
AREB6_03	2.233	8.16	9.161	3.244	21.637		15	115	42	39	10
GLI1_TARGET_GENES	3.464	8.137	4.301		17.844			199	57	68	21
ICSBP_Q6		8.117	5.077		17.398			104	32	38
PAX2_02	4.691	8.071	14.028	5.597	34.129		20	136	51	39	15
POU3F2_02	2.663	8.071	8.106	4.61	23.533		18	119	40	39	11
COUP_01	2.216	8.071	7.18	1.645	12.61		11	97	38	39	10
PAX6_TARGET_GENES		8.041	6.015		22.078			248	74	79
CDC5L_TARGET_GENES	1.316	8.034	3.21	3.111	6.904		17	98	33	45	9
FOXD3_01	11.219	8.011	12.749	4.295	26.411		15	104	42	33	22
GATA3_01	1.583	7.984	6.212	2.219	22.966		12	112	34	37	8
NFAT_Q4_01	5.791	7.983	5.816	2.336	26.066		13	124	35	39	17
T3R_Q6	2.759	7.983	2.811	6.99	12.333		22	94	26	38	11
RACCACAR_AML_Q6	3.084	7.944	4.592	2.325	19.812		13	113	32	39	12
CREB_01	2.63	7.944	1.728	1.962	9.865		12	91	23	39	11
MAZ_Q6	2.084	7.944	3.852	2.987	18.192		12	88	24	32	8
GATA6_01	1.407	7.944	8.439	8.477	23.588		25	120	41	39	8
TTF1_Q6		7.944	7.065	6.069	19.298		21	112	38	39
ZSCAN31_TARGET_GENES	5.39	7.904		1.515	15.595		27	264		90	33
HIF1_Q3	2.08	7.904	2.329		18.884			102	23	36	9
P53_DECAMER_Q2	3.21	7.899	9.399	3.744	13.422		16	97	42	38	12
S8_01	2.86	7.899	11.066	2.199	27.408		12	120	44	37	11
GR_Q6_01	4.443	7.867	3.176	5.775	19.958		21	117	29	40	15
NFKB_Q6_01	4.597	7.859	2.018	2.315	20.361		12	105	22	36	14
RORA1_01	3.846	7.855	6.981	1.817	22.438		11	112	36	37	13
OCT1_01	2.596	7.816	5.684	6.57	30.865		22	133	35	39	11
ATF4_Q2		7.81	4.082	3.716	12.748		16	96	30	38
SUPT20H_TARGET_GENES	3.378	7.785	1.711		8.474			308	85	114	34
CEBP_Q2_01	3.524	7.774	8.734	6.552	25.164		22	124	42	39	13
GTTRYCATRR_UNKNOWN	2.796	7.768	4.036	3.292	13.221		12	74	23	30	9
MEF2_Q6_01		7.766	9.297	3.862	17.324		16	103	41	37
TATA_C	3.357	7.7	6.851		17.436			113	39	40	13
ZIC2_01	2.339	7.674	6.382	3.404	16.54		15	102	35	37	10
ETS_Q4	2.339	7.674	5.944		14.618			98	34	37	10
STAT3_02	2.147	7.671		3.849	10.599		12	61		27	7
CCANNAGRKGGC_UNKNOWN	2.009	7.659	4.516	1.815	13.011		7	57	19	24	6
CREBP1CJUN_01	2.673	7.638	2.05	2.009	10.252		12	91	24	38	11
DR1_Q3	2.224	7.638	4.718	1.653	14.503		11	101	32	38	10
AMEF2_Q6	6.427	7.594	8.106	1.645	14.839		11	102	40	38	18
COUP_DR1_Q6	3.763	7.59	5.452		13.005			95	33	37	13
LHX3_01	3.048	7.59	9.7	3.717	28.562		15	117	40	35	11
NERF_Q2	1.896	7.59	2.248	4.294	14.834		17	99	24	37	9
P53_02	2.769	7.544	5.828	3.358	12.888		15	95	34	37	11
SOX10_TARGET_GENES	1.892	7.52	8.416	2.325	18.671		14	120	44	41	10
TP73_TARGET_GENES	1.658	7.517	6.398		24.166			280	83	85	20
PAX4_04	4.269	7.504	7.6	3.416	17.702		14	96	35	34	13
NFKB_C	7.027	7.469	3.85	1.619	22.465		11	118	30	38	19
STAT4_01		7.469	5.778		26.471			125	35	38
STTTCRNTTT_IRF_Q6		7.462	5.183	2.52	15.554		11	83	27	31
HNF4_01_B	1.486	7.46	7.061	4.24	16.84		17	104	37	37	8
FOXO4_01	5.585	7.457	11.674	3.499	32.237		15	127	45	36	16
PTF1BETA_Q6	3.369	7.457	12.834	1.837	19.473		11	106	47	36	12
NKX61_01	1.664	7.457	4.473	7.502	27.934		22	117	29	35	8
TCF11_01	3.709	7.419	9.924	2.877	19.749		14	110	43	37	13
SREBP1_Q6	3.856	7.413	7.956	2.199	24.358		12	115	38	36	13
MEF2C_TARGET_GENES	3.205	7.412	6.853	2.212	24.231		27	261	79	79	24
TGCGCANK_UNKNOWN	2.185	7.369	1.837		14.525			174	42	61	16
LYF1_01	1.755	7.348	5.276	5.479	18.363		20	111	34	38	9
AP1_01		7.348	3.769		11.128			95	30	38
CREBP1_Q2	5.328	7.335	3.038	5.186	14.081		19	99	27	37	16
HNF1_C	2.839	7.327	5.633	4.917	15.966		18	100	33	36	11
SOX9_B1	4.584	7.323	9.383	2.306	21.878		12	108	40	35	14
ZSCAN21_TARGET_GENES	2.184	7.315	4.304		15.942			166	49	57	15
TGANNYRGCA_TCF11MAFG_01		7.295	7.73	3.057	19.801		16	124	43	41
ELF2_TARGET_GENES	4.241	7.291	2.428		10.361			362	103	126	41
GATA1_05	2.898	7.288	8.216	12.217	24.826		31	127	42	39	12
SP1_Q2_01	3.818	7.287	4.774	5.411	10.474		19	88	31	36	13
HNF6_Q6	4.569	7.282	12.102	5.112	32.456		18	125	45	35	14
GATTGGY_NFY_Q6_01	7.149	7.281	8.414	3.298	42.992		41	405	112	105	43
EWSR1_TARGET_GENES	4.596	7.244	1.835		20.533			262	60	82	29
ZNF512B_TARGET_GENES	4.947	7.241	11.082	2.579	12.863		12	85	41	33	14
MZF1_01	1.624	7.241	6.412	6.174	21.532		20	108	34	35	8
NOTCH3_TARGET_GENES	1.367	7.241	6.859	3.802	21.372		42	332	103	102	23
ZNF507_TARGET_GENES	1.64	7.231			12.045			189		68	16
NCOA4_TARGET_GENES	2.673	7.224	3.451		15.417			242	68	81	23
MEF2D_TARGET_GENES	2.516	7.207	8.967		15.891			202	75	68	19
YATTNATC_UNKNOWN	4.075	7.196	12.953	8.483	27.77		30	161	61	47	17
FREAC2_01	5.85	7.177	6.361	5.611	35.733		20	138	36	37	17
ARP1_01	1.899	7.16			14.087			73		28	7
NF1_Q6_01	2.118	7.154	10.564		16.709			109	46	38	10
OCT1_04	5.071	7.11	14.296	2.245	25.084		12	115	49	35	15
VDR_Q3	2.574	7.106	4.17		14.857			93	28	34	10
FOXJ2_TARGET_GENES	1.673	7.101	3.48		13.636			180	52	63	15
AACYNNNNTTCCS_UNKNOWN	1.74	7.092	2.454		3.649			33	13	21	5
IRF1_01	4.301	7.081	5.007	1.741	10.363		11	89	32	36	14
SMAD4_Q6	3.396	7.07	3.104	2.232	17.68		12	102	26	35	12
LBP1_Q6	1.383	7.062	6.699	1.725	18.942		10	98	33	33	7
NKX25_02	3.579	7.058	7.558	5.066	25.466		19	123	39	37	13
OCT_Q6	3.094	7.058	5.413	4.037	21.015		17	115	34	37	12
ZNF490_TARGET_GENES	2.663	7.044	6.629	3.298	11.951		18	117	44	44	13
ZBED5_TARGET_GENES	3.497	7.017	6.436		17.873			289	92	92	29
ZNF711_TARGET_GENES	4.685	7.008	3.736		26.919			486	126	140	47
YNGTTNNNATT_UNKNOWN	4.149	6.991	8.553	5.479	30.866		24	165	51	46	17
TGACGTCA_ATF3_Q6	2.539	6.978	2.056	1.956	8.819		11	80	22	34	10
NRF2_Q4	2.741	6.959	8.414	3.744	11.266		16	92	40	36	11
ADNP_TARGET_GENES		6.957	3.726		5.648			36	15	20
ZNF16_TARGET_GENES	3.551	6.956	2.021		5.988			32	10	18	7
MZF1_02	2.08	6.936	6.573	5.7	21.085		19	106	34	34	9
AREB6_02	5.337	6.922	5.69	5.203	18.562		19	108	34	36	16
AP2REP_01	3.243	6.922	5.134	1.421	13.895		8	77	26	29	10
ZNF512_TARGET_GENES	1.617	6.922	7.188		15.433			149	53	51	12
AML1_Q6	2.16	6.903	8.312	3.55	26.519		16	126	41	37	10
AML1_01	2.16	6.903	8.312	3.55	26.519		16	126	41	37	10
ZNF257_TARGET_GENES	2.157	6.903	2.807		11.639			166	47	60	16
CREB_Q2_01	2.646	6.89	1.953	1.34	10.555		9	82	21	33	10
CCCNNNNNNAAGWT_UNKNOWN		6.881			3.049			32		21
HFH4_01	7.933	6.846	10.146		21.937			98	38	31	18
HNF4_01	2.574	6.823	7.307		10.927			95	39	37	11
GATA2_01	2.239	6.808	1.913		10.345			48	12	21	6
AAAYWAACM_HFH4_01	5.886	6.805	8.234	3.683	32.766		16	133	40	36	17
CHX10_01	4.175	6.805	12.21	4.833	19.626		17	101	44	33	13
TEF_Q6	2.239	6.805	11.321	5.154	19.671		19	111	46	36	10
SRY_01		6.805	12.21	5.35	20.75		18	103	44	33
LHX2_TARGET_GENES	3.654	6.778	7.376		29.439			368	108	103	33
GGGNNTTTCC_NFKB_Q6_01	2.915	6.772	1.84		8.083			52	14	24	8
HFH3_01	4.772	6.765	7.918	4.431	18.818		15	90	33	30	13
FOXO4_02	1.821	6.765	8.189	3.244	34.573		15	136	40	36	9
CEBP_C	5.15	6.759	6.883	3.225	22.784		13	100	32	31	14
ELK1_01	5.084	6.754	3.321	4.406	9.957		18	93	29	37	16
OCT1_Q5_01	2.554	6.754	6.799	3.909	21.903		17	119	38	37	11
EFC_Q6	2.127	6.754	7.221	3.909	14.523		17	104	39	37	10
NFE2_01		6.754	5.547	1.554	12.348		11	99	35	37
HFH8_01	6.405	6.715	8.334	6.445	21.373		19	98	35	31	16
ISRE_01	3.773	6.709	6.779		23.875			116	36	35	13
ZNF558_TARGET_GENES		6.696	4.064	3.392	9.547		17	101	34	40
LMO2COM_01	4.137	6.693	9.06	5.102	13.926		19	100	42	36	14
NFY_Q6_01	2.216	6.693	3.581		10.942			93	29	36	10
TST1_01	1.804	6.693	7.636	4.61	18.209		18	109	39	36	9
STAT1_03	2.779	6.671	5.042		12.13			93	32	35	11
MAX_01	3.105	6.653	2.291	1.984	15.173		12	103	25	36	12
SETX_TARGET_GENES	4.389	6.638	4.32		18.286			497	143	152	50
LEF1_Q6	3.094	6.614	7.558	5.564	23.197		20	119	39	36	12
CEBPB_01	2.197	6.614	5.816	5.066	22.086		19	117	35	36	10
ZSCAN5C_TARGET_GENES	2.159	6.602	4.749	1.858	9.25		8	58	22	25	7
TOP2B_TARGET_GENES	2.782	6.574	4.376		13.895			186	57	63	19
NMYC_01	1.328	6.565	4.984	2.199	21.138		13	119	34	37	8
MYB_Q6	4.269	6.552	3.447		13.992			98	28	35	14
CREB_Q2	3.562	6.537	3.476	1.952	12.165		12	97	29	36	13
TAL1ALPHAE47_01	4.802	6.512	10.998	3.311	22.444		15	115	45	35	15
ATF_B	3.105	6.495	2.099	3.019	8.497		12	68	19	29	10
DR3_Q4	2.135	6.491	3.736	1.83	8.521		8	57	20	25	7
HNF4_Q6	3.045	6.462	5.684	1.934	13.223		12	100	35	36	12
CACCCBINDINGFACTOR_Q6	1.386	6.462	7.851	3.965	17.378		17	109	40	36	8
ARNT_01		6.462	1.924	2.297	13.661		13	101	24	36
SCGGAAGY_ELK1_02	4.52	6.459	2.911		13.099			323	91	106	37
YYCATTCAWW_UNKNOWN	2.582	6.451	4.737	2.52	18.944		11	89	26	29	9
ATF1_Q6	2.982	6.433	4.807	3.196	18.729		14	102	30	33	11
CREB_Q4	3.524	6.425	2.172	1.581	9.117		11	90	25	36	13
ER_Q6	1.652	6.419	4.12	5.212	13.476		20	104	32	37	9
CDP_02	4.782	6.414	4.984	3.634	12.261		10	53	19	21	10
GATA1_02	3.832	6.414	7.867	3.016	23.998		14	115	38	34	13
RLF_TARGET_GENES		6.408	2.979	1.899	7.041		14	101	33	42
ZNF394_TARGET_GENES		6.391	4.267	1.883	6.316		15	107	40	45
E2F1_Q3_01	4.947	6.375	2.043		17.324			103	23	34	15
ZNF584_TARGET_GENES		6.368	2.291		7.704			64	19	28
CRX_Q4	3.5	6.353	13.437	6.504	28.987		22	131	51	36	13
FOXO3_01	4.369	6.336	5.14	1.786	29.139		11	124	32	34	14
NFE2L1_TARGET_GENES	2.306	6.327	4.902		35.4			549	142	146	40
CREB_Q4_01	2.267	6.326		2.173	7.872		11	73		31	9
STAT1_02	1.821	6.325	3.634		6.77			81	29	35	9
TCF11MAFG_01		6.32	5.529	3.706	16.596		14	89	29	30
MEF2_03	2.478	6.318	8.764		14.756			95	39	33	10
DLX2_TARGET_GENES	2.424	6.315	3.355		19.107			117	30	37	11
DIDO1_TARGET_GENES	1.945	6.299	2.579		11.224			394	112	130	34
EVI1_04	2.028	6.278	8.716	5.074	21.37		18	108	39	33	9
AAAYRNCTG_UNKNOWN	3.246	6.252	7.368	4.624	27.771		22	159	48	44	15
F10_TARGET_GENES	1.708	6.245	2.955		15.183			106	28	36	9
CEBPZ_TARGET_GENES	7.368	6.22	3.065		17.42			402	109	123	51
DR4_Q2	4.123	6.213	9.516	1.314	13.807		10	100	43	35	14
RREB1_01	2.852	6.189	6.326	1.879	16.132		10	89	31	30	10
NFKAPPAB_01	3.243	6.185	4.614	2.107	25.264		12	119	31	34	12
CREB_Q3		6.185	8.077	2.107	9.583		12	87	39	34
SYATTGTG_UNKNOWN	5.255	6.178	4.17		14.373			92	28	32	15
TCF4_Q5	3.396	6.16	9.597	6.069	25.504		20	116	41	33	12
RORA2_01	4.348	6.128	3.066	1.729	9.986		8	62	19	25	11
WWTAAGGC_UNKNOWN		6.106	4.796		7.53			54	22	24
PR_Q2	3.562	6.102	5.747	9.126	17.653		26	109	35	35	13
CHAF1A_TARGET_GENES		6.102	2.605		7.21			40	13	19
GATA_Q6	2.464	6.05	3.994	4.311	17.402		15	89	25	29	9
FAC1_01	2.67	6.035	7.07	6.59	12.11		20	85	34	31	10
TBP_01	3.343	6.002	7.436	2.587	5.676		13	74	37	33	12
RAAGNYNNCTTY_UNKNOWN	2.147	6.001	6.769	2.297	9.605		9	59	26	24	7
CCAWYNNGAAR_UNKNOWN	1.647	6.001			6.464			52		24	6
OCT1_02	3.302	5.977	5.657	2.212	23.9		11	104	30	30	11
HIF1_Q5	2.839	5.965	4.036		24.584			116	29	33	11
NKX3A_01	2.058	5.937	6.042	2.306	17.015		12	99	33	32	9
IRF2_01	2.424	5.917	1.63		8.257			51	13	22	7
FOXE1_TARGET_GENES	1.316	5.891	3.892		17.966			226	63	69	16
AP3_Q6	6.115	5.889	5.561	5.902	23.649		20	115	33	33	17
HMGB2_TARGET_GENES	2.23	5.889	2.487		13.65			134	35	45	13
ALPHACP1_01	2.233	5.886	4.364	1.34	9.96		10	90	31	34	10
GR_Q6	1.362	5.886	6.378		23.545			122	37	35	8
GTCNYYATGR_UNKNOWN		5.86	1.517		5.299			42	12	21
ZBTB44_TARGET_GENES	1.37	5.853	3.734	2.086	19.33		14	128	34	39	9
MAF_Q6		5.85	5.108	1.653	17.356		11	107	33	34
LCORL_TARGET_GENES	1.846	5.82	4.169		17.926			159	45	49	13
GCCNNNWTAAR_UNKNOWN	4.436	5.795	7.082	2.714	12.107		10	65	27	24	11
ARGGGTTAA_UNKNOWN		5.742	6.032	1.782	10.875		7	54	22	21
ATF_01	2.642	5.74	3.527	3.603	10.737		16	93	29	34	11
MIF1_01		5.729	1.905		9.482			69	18	27
STAT5A_02	1.706	5.717	5.963	1.918	15.393		8	68	24	23	6
ER_Q6_01	2.944	5.71	5.774	3.833	18.109		17	113	36	35	12
IRF_Q6	1.996	5.71	8.571		18.716			104	39	32	9
TITF1_Q3		5.71	7.606	3.958	12.857		16	92	37	32
TTAYRTAA_E4BP4_01	3.084	5.707	6.635	3.59	21.387		16	116	37	34	12
ATXN7L3_TARGET_GENES	4.969	5.676	3.847	1.499	13.385		11	103	31	35	16
HHEX_TARGET_GENES	3.895	5.655	4.913	1.811	25.402		31	322	88	89	31
HNF3ALPHA_Q6	5.695	5.631	10.359	5.186	16.891		17	91	39	29	15
ZNF654_TARGET_GENES	2.686	5.613	11.644	6.062	23.023		34	216	80	61	19
PHF21A_TARGET_GENES	1.652	5.572	4.485		12.629			102	33	35	9
PBX1_01	4.777	5.56	5.657	3.716	24.38		16	119	34	33	15
OCT1_07	5.353	5.543	6.766	3.933	23.86		13	89	28	25	13
SMN1_SMN2_TARGET_GENES	1.472	5.538	8.824	2.656	33.483		32	317	95	81	20
AR_Q2	2.474	5.518	3.284	2.705	8.174		9	50	17	21	7
SOX3_TARGET_GENES	4.913	5.483	7.307	2.314	31.805		21	216	62	55	23
IRF1_Q6	2.233	5.455	8.663	3.67	19.521		16	111	41	33	10
RFX1_01		5.455	5.139	2.391	6.77		13	81	33	33
PEA3_Q6		5.455	4.747	1.34	15.087		10	102	32	33
PIT1_Q6	5.136	5.454	8.321	3.168	21.704		14	108	38	31	15
SP1_01	2.047	5.454	3.587	3.601	14.408		15	94	27	31	9
USF_Q6	3.62	5.422	4.718	1.331	11.456		10	94	32	33	13
PPAR_DR1_Q2	1.436	5.422	4.718	1.653	13.601		11	99	32	33	8
MYCMAX_03	1.436	5.422	1.794	2.009	9.866		12	90	23	33	8
KAT2A_TARGET_GENES		5.413	1.75		14.335			310	78	96
GATA4_Q3	2.791	5.382	3.914	4.311	21.064		17	111	29	32	11
FOXD2_TARGET_GENES	4.123	5.364	10.252		16.502			340	124	102	36
USF_02	2.968	5.363		3.03	12.031		15	99		34	12
ZNF165_TARGET_GENES	1.489	5.357			5.069			31		16	4
CEBPB_02	1.796	5.354	8.524	1.314	25.059		10	122	41	33	9
ZNF524_TARGET_GENES		5.327	2.008	1.506	7.84		13	106	30	40
ZF5_B	1.598	5.31	2.48	1.515	18.347		10	103	24	31	8
NFXL1_TARGET_GENES	2.887	5.298	10.634	2.325	32.036		16	165	55	41	14
EGR_Q6		5.297	3.201	3.416	19.599		16	116	29	34
GATA_C	1.779	5.287	7.515	3.174	19.812		15	113	39	33	9
HSF_Q6	1.902	5.251	2.992	2.708	11.67		12	80	23	28	8
MEIS1AHOXA9_01	2.564	5.233	6.093	2.822	21.065		9	69	22	20	7
OSF2_Q6		5.218	7.432	3.145	17.025		15	108	39	33
IPF1_Q4	3.21	5.209	4.139	2.877	20.813		14	112	30	32	12
ZNF577_TARGET_GENES		5.176	3.411	2.876	10.912		22	155	47	52
HNF3B_01	4.269	5.166	6.656	4.933	20.463		17	101	33	29	13
SPZ1_01	2.539	5.165	5.72		19.591			103	32	30	10
ZNF274_TARGET_GENES	2.161	5.143	4.443	1.915	21.509		33	324	90	91	26
CP2_01	1.465	5.142	4.843	2.055	16.919		12	105	32	32	8
STAT6_02	1.465	5.142	4.843	1.692	22.121		11	115	32	32	8
ZNF549_TARGET_GENES	2.245	5.137	7.172	2.555	22.465		23	206	65	57	17
MCM3_TARGET_GENES		5.125			3.501			53		26
HDGF_TARGET_GENES	2.574	5.122	1.413		4.891			77	22	33	11
LXR_DR4_Q3		5.119	2.311		8.943			42	12	17
HOXB6_TARGET_GENES	1.449	5.113	1.966		11.039			182	48	60	15
NFY_01		5.111	3.014		9.391			88	27	32
MAML1_TARGET_GENES		5.084	5.136		12.152			108	37	36
SNIP1_TARGET_GENES	1.868	5.071	2.638		8.05			199	60	69	19
H1_6_TARGET_GENES		5.068	4.697	1.931	12.083		19	160	52	52
YY1_02		5.034	2.024		6.396			77	23	31
ZNF33A_TARGET_GENES		5.034	3.263		8.453			83	27	31
ZNF362_TARGET_GENES	2.686	5.026	6.678		18.645			204	66	59	19
ZSCAN2_TARGET_GENES	1.759	5.023	2.348		13.291			251	67	78	21
NKX22_01	1.642	5.007	6.606	1.319	15.554		8	83	30	26	7
RAG1_TARGET_GENES	2.938	5.006	1.828		15.427			290	72	87	28
ZNF623_TARGET_GENES		4.998								17
PBXIP1_TARGET_GENES	3.459	4.996	8.515	7.547	9.771		24	93	42	33	13
RYCACNNRNNRNCAG_UNKNOWN	2.849	4.996		1.583	5.111		5	30		15	6
TEL2_Q6	1.624	4.996	2.872		7.274			77	25	30	8
DNMT1_TARGET_GENES	1.752	4.988	3.447		7.507			63	22	25	7
EVI1_02	3.466	4.961	3.307	1.562	10.148		7	57	18	21	9
ZIC1_01	2.206	4.95	6.711	3.199	16.115		15	105	37	32	10
ACCTGTTG_UNKNOWN	2.503	4.915	6.135	8.001	15.27		19	73	26	23	8
BARHL1_TARGET_GENES		4.899			16.911			318		93
FREAC3_01	3.218	4.834	5.756	1.72	29.847		11	127	34	31	12
CCAWWNAAGG_SRF_Q4	1.378	4.826		1.373	6.976		5	37		16	4
TGTYNNNNNRGCARM_UNKNOWN		4.826	2.503	1.373	5.953		5	35	12	16
NFKB_Q6	3.709	4.802	6.585		23.587			117	36	31	13
ETF_Q6	1.496	4.794	3.105	3.995	15.803		11	61	16	19	5
GGAMTNNNNNTCCY_UNKNOWN		4.794	1.539		4.997			41	12	19
HMEF2_Q6	4.691	4.77	7.161	1.945	8.598		8	55	26	21	11
HLF_01		4.77	6.982	2.866	20.658		14	112	37	31
GATA1_04	2.399	4.757	7.479	4.955	20.941		18	109	37	30	10
HOXA2_TARGET_GENES	3.215	4.753	9.316		39.501			495	144	120	39
CREB_02	1.465	4.74	4.082	1.364	10.256		10	90	30	31	8
ZNF260_TARGET_GENES	1.306	4.74	1.54	1.848	7.332		18	137	37	49	12
EVI1_06		4.723			4.413			13		8
PPARA_01		4.713			4.091			17		10
NCOA2_TARGET_GENES		4.7	1.931		14.109			167	41	51
AGCYRWTTC_UNKNOWN		4.695	3.482	3.392	8.361		10	49	17	19
BANP_TARGET_GENES		4.695			10.616			205		66
PRDM5_TARGET_GENES		4.695	3.032	1.349	6.47		6	45	16	19
CDC73_TARGET_GENES		4.678	2.526		7.898			143	43	50
CTAWWWATA_RSRFC4_Q2	1.768	4.674	9.377	7.192	23.489		27	148	52	39	11
RTTTNNNYTGGM_UNKNOWN	3.127	4.646	7.465	3.19	18.039		11	76	28	22	9
ZNF140_TARGET_GENES	2.799	4.628	2.119	1.447	10.558		18	163	44	53	18
YNTTTNNNANGCARM_UNKNOWN	1.621	4.628	5.723	1.659	7.364		5	33	16	14	4
TTGCWCAAY_CEBPB_02		4.617			6.599			29		13
STAT_Q6	3.127	4.616	7.68		17.356			107	39	31	12
YY1_01	2.799	4.598	6.818		21.223			111	36	30	11
GR_01		4.595	5.195	3.749	19.913		14	94	28	26
RBM15_TARGET_GENES		4.594			4.481			46		21
ZC3H11A_TARGET_GENES	4.895	4.584	2.976		9.467			166	50	55	24
POU1F1_Q6	3.457	4.584	5.537	2.693	19.874		13	105	32	29	12
BARX1_TARGET_GENES		4.58	2.854		12.081			323	92	99
GTF2A2_TARGET_GENES	1.756	4.575	1.48		4.888			131	38	50	14
MYB_Q3	3.773	4.569	4.29	2.128	17.907		12	105	30	30	13
ZNF8_TARGET_GENES	1.451	4.526	5.406		18.238			301	91	85	22
CEBP_Q3	1.892	4.504	4.227	5.805	16.132		20	102	30	30	9
GCGNNANTTCC_UNKNOWN		4.501			1.743			32		19
CTGRYYYNATT_UNKNOWN	3.631	4.496	3.146		5.388			30	12	14	7
WYAAANNRNNNGCG_UNKNOWN		4.473	4.932		6.836			30	14	13
MYOD_01	4.075	4.465	4.944	4.529	18.646		18	111	33	31	14
ZNF223_TARGET_GENES	2.512	4.434	3.802	2.113	15.625		14	119	34	35	12
FOXG1_TARGET_GENES	1.423	4.42			10.094			167		54	14
CDP_01	3.763	4.418	5.36	2.866	12.99		8	49	18	16	8
SREBP_Q3	2.741	4.412	5.723	2.877	14.33		14	99	34	30	11
SRY_02	2.729	4.381	6.982	3.298	28.179		15	125	37	30	11
CATRRAGC_UNKNOWN	1.752	4.365	4.139	1.535	12.555		7	62	20	20	6
GAANYNYGACNY_UNKNOWN		4.365	2.057	3.416	4.179		8	28	10	14
GATA1_01	3.357	4.361	4.479	3.485	21.485		15	110	30	29	12
EGR2_01	3.551	4.343	3.305	1.62	16.237		9	86	23	25	11
FOXM1_01		4.329	7.911	2.188	18.121		12	104	38	29
E4BP4_01	1.376	4.327	4.471	3.416	18.239		14	97	28	27	7
EVI1_03	1.892	4.321	1.851		8.259			30	8	12	4
TEAD2_TARGET_GENES	3.127	4.32	1.777		22.217			416	98	112	37
ATF6_TARGET_GENES	3.729	4.319	3.482		17.588			302	83	85	31
MMEF2_Q6	3.5	4.319	10.146	3.506	21.001		16	117	45	31	13
HOXB4_TARGET_GENES		4.309	5.75		17.887			328	101	92
E2F1_Q4		4.301		1.459	7.91		10	81		29
FREAC7_01	2.476	4.275	7.707	4.909	10.051		16	74	33	25	9
CDX2_Q5	4.725	4.263	8.663	3.67	19.521		16	111	41	30	15
FREAC4_01	2.608	4.258	2.033	3.744	18.443		12	76	16	21	8
SNAI1_TARGET_GENES		4.257	4.491		10.916			152	50	48
HFH1_01	4.931	4.241	6.419	3.849	21.937		16	112	35	29	15
YY1_Q6		4.241	1.765		9.973			87	22	29
YTAAYNGCT_UNKNOWN	3.738	4.218	6.447	4.293	14.578		13	70	26	21	10
TAXCREB_02		4.181			1.391			9		8
SRF_01		4.177		1.556	2.642		4	18		11
TSHZ1_TARGET_GENES	2.108	4.165	1.522		10.225			72	17	24	8
TCCATTKW_UNKNOWN	2.028	4.157	5.079	1.535	20.814		10	107	31	28	9
MEIS1BHOXA9_01	3.332	4.155	11.321	2.359	18.38		9	73	33	20	9
WCAANNNYCAG_UNKNOWN		4.152			8.547			84		29
USF2_Q6		4.152	5.042	2.117	15.304		12	100	32	29
HNF3_Q6	6.127	4.131	7.6	3.003	15.554		12	83	32	24	15
OCT1_06	1.779	4.119	12.08		18.785			111	48	30	9
MYB_Q5_01	5.177	4.09	7.028		17.161			108	38	30	16
FXR_IR1_Q6	2.135	4.088	8.522	1.47	9.174		6	48	25	17	6
LXR_Q3		4.064	1.882	2.031	7.545		6	36	10	14
TBX3_TARGET_GENES		4.038			7.819			105		36
GCM_Q2	2.423	4.036	3.42	2.219	24.131		12	114	27	28	10
ACTAYRNNNCCCR_UNKNOWN		4.03			10.525			140		44
ZNF331_TARGET_GENES	1.768	4.007	3.122		13.461			125	35	37	11
AUTS2_TARGET_GENES		3.982	4.565	1.932	12.763		17	144	46	43
TNCATNTCCYR_UNKNOWN	2.292	3.969	2.106		3.777			42	15	19	7
HES4_TARGET_GENES	1.643	3.966			15.095			186		53	15
TET1_TARGET_GENES	1.744	3.957	1.903		15.413			247	61	70	20
ZNF547_TARGET_GENES		3.954	3.736	1.411	7.622		7	55	20	20
CGTSACG_PAX3_B		3.954	3.736	1.83	4.161		8	46	20	20
PR_01		3.954	3.736	3.825	15.477		12	70	20	20
WHN_B	3.171	3.949	4.811	2.836	9.771		14	89	32	29	12
CTCNANGTGNY_UNKNOWN	2.45	3.917			8.209			41		15	6
NKX25_01	1.407	3.912	5.208	3.794	12.917		11	59	21	18	5
ZNF329_TARGET_GENES	4.545	3.9	3.083		9.885			166	50	52	23
YTCCCRNNAGGY_UNKNOWN		3.888			3.968			27		13
YKACATTT_UNKNOWN	3.771	3.877	10.893	1.742	22.241		12	124	48	31	14
CYTAGCAAY_UNKNOWN		3.877	3.231		11.726			64	19	20
CHOP_01	2.964	3.834	2.267	1.916	21.143		11	107	23	27	11
ZMYM2_TARGET_GENES	2.424	3.827	4.095	2.14	6.863		8	48	19	18	7
PTPRA_TARGET_GENES		3.827			4.438			42		18
E4F1_Q6		3.825	3.561	3.253	12.191		16	103	31	31
DBP_TARGET_GENES	2.965	3.813			13.164			234		68	24
CMYB_01	1.892	3.748	4.614	1.407	11.595		10	92	31	28	9
TOX4_TARGET_GENES		3.747			1.6			45		23
TAF9B_TARGET_GENES		3.746	1.539		6.123			146	41	50
TTCNRGNNNNTTC_HSF_Q6	3.127	3.724	3.098		6.957			55	19	20	9
NKX2_2_TARGET_GENES	3.737	3.722	4.378		28.987			400	104	98	36
E2F_Q2		3.7	4.315	1.835	14.203		9	77	24	22
LEF1_Q2	2.129	3.689	6.777	4.778	19.688		17	102	34	26	9
PAX5_01		3.688	3.066	2.171	15.395		9	72	19	20
AR_Q6	3.198	3.638	2.74	2.866	15.128		14	101	26	28	12
GTTGNYNNRGNAAC_UNKNOWN	1.598	3.623	2.526	1.485	8.791		6	47	14	16	5
TGASTMAGC_NFE2_01		3.617	3.785	1.652	7.3		9	66	24	23
CREBP1_01	1.31	3.599	5.093	2.212	15.909		10	81	26	22	6
NR1H4_TARGET_GENES	3.002	3.586	1.7		12.245			109	26	32	13
MYAATNNNNNNNGGC_UNKNOWN	2.729	3.579	1.72		5.749			41	12	16	7
RYTGCNNRGNAAC_MIF1_01		3.578	2.427		3.928			31	12	14
GLI3_TARGET_GENES	1.745	3.573			10.954			205		61	18
ZNF560_TARGET_GENES	2.092	3.572	4.083	1.581			4		11	10	4
DYRK1A_TARGET_GENES	3.021	3.557	1.442		14.993			227	53	63	23
TAAWWATAG_RSRFC4_Q2		3.554	5.09	1.938	14.383		9	75	25	21
PAX6_01		3.527	4.378		8.573			44	17	15
NFY_C	3.818	3.524	2.955		10.474			88	26	27	13
GUCY1B1_TARGET_GENES	1.748	3.489			7.666			179		57	17
EVI1_05	1.824	3.487	6.466	1.916	14.61		9	76	28	21	7
CREB3_TARGET_GENES		3.48	7.198	1.71	12.207		15	131	50	38
FOXJ2_01	4.947	3.472	8.397	3.091	15.809		12	82	33	22	13
TAXCREB_01		3.389	1.386	1.96	6.486		8	50	13	18
TATA_01	1.493	3.362	2.498	2.095	7.321		12	81	25	27	8
CBX7_TARGET_GENES	1.545	3.356	17.877	2.654	31.965		33	323	123	74	21
CDPCR1_01	2.424	3.355	6.757		9.771			54	24	17	7
RYTAAWNNNTGAY_UNKNOWN	1.785	3.349	5.778		9.918			34	15	11	4
RYAAAKNNNNNNTTGW_UNKNOWN	1.433	3.339	1.784	2.535	7.055		7	36	10	13	4
NCOA6_TARGET_GENES		3.333	6.113	2.484	8.844		16	109	43	34
RYTGCNWTGGNR_UNKNOWN	1.509	3.326	4.102	1.389	9.863		6	51	18	16	5
RFX7_TARGET_GENES	1.884	3.319			9.765			146		44	14
STAT_01		3.313	5.312		18.707			108	33	27
RGTTAMWNATT_HNF1_01	1.586	3.309			4.891			29		12	4
ZNF85_TARGET_GENES		3.309		1.428	6.217		12	94		32
AHR_01		3.231			3.246			23		11
ZNF250_TARGET_GENES		3.23			4.026			123		44
DLX6_TARGET_GENES	2.236	3.223	1.394		6.637			155	42	50	17
PPARA_02	2.934	3.204		2.076	7.741		8	51		17	8
SETD7_TARGET_GENES		3.198			9.137			251		75
NFY_Q6	1.444	3.186	2.068	1.659	13.718		11	99	24	27	8
AR_01		3.155	6.711		11.577			66	27	19
HMGA1_TARGET_GENES		3.144	7.563	1.378	24.732		33	364	112	89
EN1_01	1.598	3.137	4.984	2.484	12.261		8	53	19	15	5
ZNF239_TARGET_GENES		3.105			2.829			15		8
GNCF_01	1.518	3.1		4.781	6.369		10	33		12	4
SETD1A_TARGET_GENES	2.219	3.097			11.952			357		101	32
TERF2_TARGET_GENES		3.097	3.792		8.296			53	19	17
TERF1_TARGET_GENES		3.083	7.322		11.094			101	41	29
DLX4_TARGET_GENES	1.986	3.07	1.59		6.42			209	59	66	21
MYOGNF1_01		3.056	1.315		4.527			21	6	9
DNMT3A_TARGET_GENES	1.394	3.031			7.708			159		49	14
POU3F2_01		3.03	5.515	1.627	14.857		6	54	19	14
ARNT_02	2.759	3.023	1.68	2.484	11.067		13	91	22	26	11
NCX_01	2.796	3.022	6.375	9.682	24.77		22	93	28	20	9
PAX3_B	1.892	3.012	3.876		9.907			43	15	13	5
GGARNTKYCCA_UNKNOWN		3.005	2.854		6.597			34	12	12
HOXA1_TARGET_GENES	1.51	2.996	1.879		9.769			275	75	80	23
YGCANTGCR_UNKNOWN		2.984			9.029			52		16
GATA1_03	1.574	2.932	5.737	3.499	18.417		15	104	33	25	8
YWATTWNNRGCT_UNKNOWN	2.978	2.91	3.307		10.151			37	12	11	6
ZNF23_TARGET_GENES		2.891			3.166			9		5
EVI1_01		2.891								5
SAFB2_TARGET_GENES	2.226	2.882	2.573		7.041			202	62	62	21
AHR_Q5	4.891	2.875	6.279	1.385	8.634		9	76	32	23	14
ACTWSNACTNY_UNKNOWN		2.87	1.885		5.562			39	12	14
PAX8_B		2.87	4.169	2.592	6.956		8	42	17	14
EGR3_01	2.039	2.866			7.215			36		12	5
ZBTB5_TARGET_GENES		2.848	1.698		2.163			46	17	20
USF_01		2.835		1.653	10.252		11	91		26
ZNF816_TARGET_GENES	1.527	2.787	6.419	2.499	11.043		19	140	52	39	12
GGCNRNWCTTYS_UNKNOWN		2.776			3.632			29		12
ZNF784_TARGET_GENES	1.892	2.772			4.375			102		35	12
PAX5_02		2.764								5
AACWWCAANK_UNKNOWN		2.763	2.992		9.878			59	18	17
IRF5_TARGET_GENES	1.59	2.761			10.402			223		63	19
CCTNTMAGA_UNKNOWN	1.337	2.742	2.574		11.698			59	16	16	5
YGCGYRCGC_UNKNOWN	2.473	2.728	4.731	2.076	9.757		14	105	37	30	12
ZID_01	1.77	2.723	4.562	1.61	16.676		11	107	32	26	9
SATB1_TARGET_GENES	3.917	2.711	6.967	1.871	38.677		53	585	160	131	49
MYC_Q2		2.711	4.49	2.157	11.666		10	74	25	20
XBP1_01		2.711	1.816		6.611			49	14	16
CEBPA_01	1.493	2.7	7.099	3.343	23.924		15	117	37	25	8
RNCTGNYNRNCTGNY_UNKNOWN	1.389	2.693	2.543		3.439			29	12	12	4
MSX1_TARGET_GENES		2.67	2.829		7.022			67	22	21
TCCCRNNRTGC_UNKNOWN		2.661	1.872		4.891			64	20	22
PAX8_TARGET_GENES		2.651			2.641			27		12
CEBPGAMMA_Q6	2.268	2.633	9.877	1.702	25.733		11	121	43	25	10
FXR_Q3		2.575	5.939		11.096			52	21	14
E2F_03		2.54	1.799		8.268			82	22	24
ZNF746_TARGET_GENES		2.54	2.899		2.686			25	12	11
ZNF680_TARGET_GENES	2.332	2.492	4.051	2.274	13.528		23	189	57	49	18
CRGAARNNNNCGA_UNKNOWN		2.441			1.425			14		8
LMNB2_TARGET_GENES		2.435			2.352			14		7
ZNF236_TARGET_GENES		2.421			4.57			62		21
HDAC8_TARGET_GENES		2.398	1.89		4.532			43	14	15
GCGSCMNTTT_UNKNOWN		2.386	1.392		4.803			28	8	10
E2F_Q3		2.376			8.344			77		22
TTTNNANAGCYR_UNKNOWN		2.368	1.536		2.835			38	13	15
SREBP1_01	2.302	2.338	2.18	1.916	5.527		9	56	18	18	8
TBX1_TARGET_GENES	1.68	2.331	2.17		9.25			69	19	19	7
MCM2_TARGET_GENES		2.327			3.705			23		9
SMARCA1_TARGET_GENES		2.278	1.792						14	15
KAT5_TARGET_GENES	1.306	2.276	2.162		8.346			230	66	65	19
NRF1_Q6	2.239	2.264			8.558			86		24	10
YBX1_TARGET_GENES		2.259	1.703		2.759			24	9	10
HEY2_TARGET_GENES		2.259	3.146		4.891			29	12	10
NPAT_TARGET_GENES	1.349	2.257								25	8
OVOL3_TARGET_GENES		2.229			8.691			144		40
GGCNNMSMYNTTG_UNKNOWN	1.57	2.219			8.02			35		10	4
CETS1P54_01	2.216	2.205	2.31		5.696			78	25	24	10
SIX4_TARGET_GENES	1.561	2.191	2.688		2.792			16	8	7	3
CTGYNNCTYTAA_UNKNOWN	1.944	2.184	6.467	3.68	8.649		9	40	19	11	5
SREBP1_02		2.184	3.496		5.953			35	14	11
NPM1_TARGET_GENES		2.183			4.108			92		30
BCL6B_TARGET_GENES	2.917	2.145	7.28		12.851			71	29	17	9
GTTNYYNNGGTNA_UNKNOWN	2.535	2.112	2.898		6.174			36	13	11	6
AHRARNT_01	1.718	2.112	3.558	2.399	8.946		9	56	19	15	6
YRCCAKNNGNCGC_UNKNOWN	1.73	2.105	1.994		7.259			31	9	9	4
GATGKMRGCG_UNKNOWN		2.105		2.399	6.079		6	29		9
ZNF37A_TARGET_GENES	3.702	2.102	5.32		6.058			53	24	16	10
RACTNNRTTTNC_UNKNOWN	1.377	2.074								14	5
ZNF669_TARGET_GENES	1.367	2.046								14	5
GTF2E2_TARGET_GENES		2.046			1.909			91		33
ATGGYGGA_UNKNOWN	2.855	2.036			7.594			43		12	7
ZA_UNIPROT_Q9UM89_UNREVIEWED_TARGET_GENES		1.992			3.274			21		8
ZNF677_TARGET_GENES		1.991		1.619	2.835		7	38		14
E2F1_Q3		1.986			8.819			83		22
FOXC1_TARGET_GENES	2.197	1.98	1.884		2.768			17	7	7	4
HOX13_01	1.47	1.98	2.437	3.129	6.824		6	24	8	7	3
ACAWYAAAG_UNKNOWN		1.975	2.248	1.548	5.02		6	38	13	12
KCCGNSWTTT_UNKNOWN		1.945			7.176			43		12
PR_02		1.939	2.955	2.046	9.414		8	55	17	14
MEF2_04		1.935			1.492			9		5
GGGNRMNNYCAT_UNKNOWN		1.922			6.671			35		10
SRPK1_TARGET_GENES	1.59	1.917	1.331		4.81			92	26	28	10
HTF_01		1.909	4.497	1.682	5.304		5	29	14	9
ZSCAN18_TARGET_GENES		1.884								7
HOXB7_TARGET_GENES		1.867			1.824			10		5
GKCGCNNNNNNNTGAYG_UNKNOWN		1.867	2.256						9	8
MCAATNNNNNGCG_UNKNOWN		1.856	2.626		4.464			31	12	10
ZNF777_TARGET_GENES	1.41	1.838			1.678			15		7	3
RUVBL2_TARGET_GENES		1.831								6
ELF5_TARGET_GENES		1.811			5.237			116		34
NRF2_01	1.741	1.792	2.154		6.345			82	25	23	9
CCAWNWWNNNGGC_UNKNOWN		1.791		1.389	1.799		5	24		10
PAX8_01	1.635	1.779			4.332			18		6	3
MCRS1_TARGET_GENES		1.779								6
RRCCGTTA_UNKNOWN		1.76			3.346			29		10
PSIP1_TARGET_GENES		1.75			2.269			20		8
HSF2_TARGET_GENES		1.735			7.119			78		21
RNTCANNRNNYNATTW_UNKNOWN		1.712	3.135		8.296			32	11	8
EPC1_TARGET_GENES		1.697		1.414	4.464		9	63		19
SRSF9_TARGET_GENES	3.353	1.685	2.531		31.085			311	69	62	27
ALKBH3_TARGET_GENES		1.684			3.092			104		33
ZMYND11_TARGET_GENES		1.668								7
NFMUE1_Q6		1.668	1.782	1.45	7.824		10	81	22	21
ATCMNTCCGY_UNKNOWN		1.668			2.435			18		7
ZNF704_TARGET_GENES		1.641								8
CDX1_TARGET_GENES		1.635			1.923			14		6
CCGNMNNTNACG_UNKNOWN		1.635			3.049			26		9
ID2_TARGET_GENES	3.002	1.626	2.856		13.734			292	81	71	29
SS18_SSX1_FUSION_UNIPROT_Q8IZH1_UNREVIEWED_TARGET_GENES	1.86	1.612	3.773		4.435			33	15	10	5
PRDM12_TARGET_GENES		1.585		1.817	2.884		8	42		14
PCGF6_TARGET_GENES		1.573	1.486						8	8
SNACANNNYSYAGA_UNKNOWN	3.763	1.555			2.439			28		10	8
PAX3_01		1.542								4
SKP2_TARGET_GENES		1.54	2.348	2.314	2.124		6	21	10	8
STAT1_01		1.54			2.471			22		8
E2F1_Q6_01		1.531			10.392			86		20
WCTCNATGGY_UNKNOWN		1.514			2.054			24		9
NME2_TARGET_GENES		1.509	2.305		2.048			21	10	8
ZNF34_TARGET_GENES		1.509								8
ZNF548_TARGET_GENES		1.506			2.027			15		6
NRSF_01		1.504	4.657		11.888			48	17	10
MED25_TARGET_GENES		1.502	2.526	3.06	3.854		9	36	14	11
CDH4_TARGET_GENES		1.487			1.988			24		9
ATF6_01		1.483	2.05	2.194	11.916		8	57	14	12
RORA_TARGET_GENES	1.451	1.48			3.721			70		21	8
ZNF586_TARGET_GENES	1.77	1.477	1.404						5	5	3
ZNF486_TARGET_GENES		1.474			9.695			97		23
NR1I2_TARGET_GENES		1.473			7.543			102		26
ZNF169_TARGET_GENES	1.47	1.469			1.575			14		6	3
ZBED4_TARGET_GENES		1.464	1.63		5.788			56	16	15
SIRT3_TARGET_GENES	1.87	1.449			3.49			22		7	4
E2F1DP1RB_01		1.448		1.979	9.015		11	80		19
PPARG_01	1.451	1.43	2.381		3.604			19	8	6	3
PPARGC1A_TARGET_GENES		1.43								10
SNRNP70_TARGET_GENES	1.379	1.426	2.001		14.463			278	71	65	21
ZNF292_TARGET_GENES		1.426	1.358	1.71			3		4	4
HOXA3_01		1.426								3
ZNF781_TARGET_GENES		1.419		1.936	5.137		10	62		17
ZSCAN23_TARGET_GENES	1.962	1.409		1.389			5			9	5
ZNF830_TARGET_GENES		1.408		2.541	1.833		14	65		22
SRCAP_TARGET_GENES	2.334	1.401	4.925		22.217			189	53	37	16
NEUROD2_TARGET_GENES		1.397								2
ZNF530_TARGET_GENES		1.397	1.341						2	2
MSX1_01	2.289	1.394	9.679	2.325	11.829		10	71	34	15	8
ATOH8_TARGET_GENES		1.391	3.133		4.922			18	8	5
ZNF157_TARGET_GENES		1.387			1.753			18		7
CAGNWMCNNNGAC_UNKNOWN	1.944	1.386	4.614		6.456			36	16	9	5
PRMT5_TARGET_GENES	1.725	1.386	1.63	1.627	3.208		6	32	11	10	5
KDM1B_TARGET_GENES		1.386			1.726			27		10
E2F_Q4_01		1.376			8.535			80		19
ZNF582_TARGET_GENES		1.368								8
IRX2_TARGET_GENES		1.358			1.787			40		14
SIPA1_TARGET_GENES		1.358			3.073			42		13
CAVIN1_TARGET_GENES	1.355	1.335	2.427		1.384			23	12	9	4
HOXA10_TARGET_GENES	1.374	1.33			3.176			70		21	8
COBLL1_TARGET_GENES		1.32	2.893		2.42			40	18	13
KTGGYRSGAA_UNKNOWN	3.551	1.312			4.51			29		8	7
NR1D1_TARGET_GENES		1.306			1.998			32		11
GABP_B	3.607		1.534		9.391			89	22		13
HMX1_01	2.281		2.621		4.221			19	8		4
ZNF488_TARGET_GENES	2.248				1.397			13			4
CAGNYGKNAAA_UNKNOWN	2.137		2.444		6.914			34	11		5
PTTG1_TARGET_GENES	2.097										5
WDHD1_TARGET_GENES	1.969		1.571		2.728			53	18		8
CASP8AP2_TARGET_GENES	1.95				2.547			81			11
ARNT2_TARGET_GENES	1.809		1.932		10.801			189	50		17
PER1_TARGET_GENES	1.803										3
CIC_TARGET_GENES	1.803				4.591			106			12
TBPL1_TARGET_GENES	1.694		2.275		2.706			40	16		6
HOXD11_TARGET_GENES	1.647				1.773			37			6
CSHL1_TARGET_GENES	1.583		2.436		6.532			76	24		8
ZNF202_TARGET_GENES	1.461		3.273	3.236	2.785		8	26	13		4
HSD17B8_TARGET_GENES	1.361		1.912		6.122			166	49		15
YTTCCNNNGGAMR_UNKNOWN	1.357				1.455			15			3
ZNF595_TARGET_GENES	1.355		1.599		4.767			33	10		4
ZNF707_TARGET_GENES	1.339										3
THRA_TARGET_GENES					1.556			28
WIZ_TARGET_GENES					1.387			7
ZNF501_TARGET_GENES			1.447						3
E2F_Q3_01					7.98			78
ZZZ3_TARGET_GENES					1.487			30
SOX11_TARGET_GENES					1.397			13
SGCGSSAAA_E2F1DP2_01					7.429			60
CCAATNNSNNNGCG_UNKNOWN			1.334		3.372			22	7
HOXA7_TARGET_GENES					4.228			38
NUP214_TARGET_GENES			3.611						5
TCOF1_TARGET_GENES			1.364						3
ZNF555_TARGET_GENES					1.433			20
E2F1DP2_01					10.509			85
YAATNANRNNNCAG_UNKNOWN			5.884	2.951	6.546		7	31	16
ZBTB1_TARGET_GENES			1.312		2.868			34	11
AAGWWRNYGGC_UNKNOWN			1.781	2.245	5.395		8	43	13
HOXC13_TARGET_GENES					4.06			39
KMCATNNWGGA_UNKNOWN			3.078		8.275			42	14
ZNF697_TARGET_GENES					2.045			26
ZNF622_TARGET_GENES					1.878			20
ZNF585B_TARGET_GENES			1.605		5.091			44	13
SMCHD1_TARGET_GENES					1.345			19
ZNF433_TARGET_GENES				1.797			5
ADCYAP1_TARGET_GENES					1.464			5
E2F_Q6					10.311			84
FOXD3_TARGET_GENES					3.269			15
MTHFD1_TARGET_GENES				2.457			3
TMTCGCGANR_UNKNOWN					4.161			50
GGCNKCCATNK_UNKNOWN				1.349	9.93		6	52
DPPA3_TARGET_GENES					1.387			4
E2F_02					10.509			85
ZNF41_TARGET_GENES				1.693	8.119		6	42
CDPCR3_01				1.419	3.737		4	22
RAX2_TARGET_GENES					1.345			19
MPHOSPH8_TARGET_GENES			1.756						3
ZFP28_TARGET_GENES			2.434		4.709			42	15
ACAWNRNSRCGG_UNKNOWN					6.421			29
ALX4_TARGET_GENES					2.149			12
E2F1_Q4_01					8.252			77
E2F4DP2_01					10.509			85
ZNF510_TARGET_GENES			1.601	2.552	1.636		5	13	6
TRIP13_TARGET_GENES				2.252			7
LMX1B_TARGET_GENES					1.498			10
AHRARNT_02					1.406			6
STAT3_01					3.197			11
NUFIP1_TARGET_GENES			1.352		1.844			15	6
METTL14_TARGET_GENES			3.098	2.658	8.248		10	58	19
PPARA_TARGET_GENES			1.994						9
E2F1_Q6					9.11			81
TTANWNANTGGM_UNKNOWN					3.681			24
SETBP1_TARGET_GENES					1.988			46
E2F_Q6_01				1.525	6.769		10	76
ATF5_TARGET_GENES			1.854		13.558			148	36
ZNF708_TARGET_GENES					3.014			30
NEUROG3_TARGET_GENES			1.358						4
HOXD1_TARGET_GENES					4.51			29
DMRT1_TARGET_GENES					7.371			117
TAANNYSGCG_UNKNOWN			2.321	1.488	4.484		5	30	11
E2F1DP1_01					10.509			85
NKX6_1_TARGET_GENES				2.117	3.032		4	14
CHAMP1_TARGET_GENES			1.483		6.147			66	18
ELK1_02			1.931		5.719			76	23
NR5A1_TARGET_GENES			2.435		1.896			8	5
CGGAARNGGCNG_UNKNOWN					1.485			16
CTR9_TARGET_GENES					3.141			23
MYBL1_TARGET_GENES					2.647			52
AR_02					2.572			15
MXD1_TARGET_GENES					3.44			46
SRPK2_TARGET_GENES			1.511		4.161			29	9
ZNF626_TARGET_GENES					1.302			5
MED16_TARGET_GENES					1.497			14
YGACNNYACAR_UNKNOWN					3.462			32
METHYLCYTOSINE_DIOXYGENASE_TET_UNIPROT_A0A023HHK9_UNREVIEWED_TARGET_GENES					3.699			51
CEBPE_TARGET_GENES					5.861			19
TFCP2_TARGET_GENES					3.438			26
SEF1_C					1.91			4
ARID3B_TARGET_GENES					2.571			33
SOX15_TARGET_GENES			1.493						2
TASOR_TARGET_GENES					2.644			71
PITX1_TARGET_GENES					2.237			80
E2F_Q4				1.563	10.927		10	86
YBX3_TARGET_GENES					1.626			16
YGTCCTTGR_UNKNOWN			3.527		5.163			36	15
ZNF354B_TARGET_GENES			1.828		2.455			52	19
MNX1_TARGET_GENES					3.677			5
ZNF791_TARGET_GENES				2.399			6
ZNF426_TARGET_GENES					2.016			25
GGCKCATGS_UNKNOWN					7.497			32
PAX2_01			1.811		5.541			26	8
AR_03					3.612			22
ZNF581_TARGET_GENES					4.637			88
FOXF2_TARGET_GENES			1.493						2
YRTCANNRCGC_UNKNOWN			3.135		4.768			26	11
EMX1_TARGET_GENES			3.595		5.72			69	26
PAF1_TARGET_GENES			1.603	1.563	2.17		5	23	9
E2F4DP1_01				1.525	9.695		10	84
ZNF101_TARGET_GENES					1.998			56
ASXL2_TARGET_GENES					3.917			13
PSMB5_TARGET_GENES			1.374						24
ZNF445_TARGET_GENES					1.387			4
FOXO4_TARGET_GENES			2.772		8.224			94	29
SYNCRIP_TARGET_GENES					1.616			8
E2F_01			1.914		4.715			27	9
GGAANCGGAANY_UNKNOWN					1.793			29
ZNF133_TARGET_GENES				1.758	6.254		8	53
RUVBL1_TARGET_GENES					1.645			43

## Sheet: Excel2LaTeX
RangeAddress	Options	CellWidth	Indent	FileName
472	7	4	0	S8 - Cibersort Odds Ratios.tex
